# Supplementary material for: An efficient, green synthesis of novel regioselective and stereoselective indan-1,3-dione grafted spirooxindolopyrrolizidine linked 1,2,3-triazoles via a one-pot five-component condensation using PEG-400
Source: Royal Society of Chemistry journal article supplement (doi:10.1039/c5ra03505h), 2015-01-01

**An efficient, green synthesis of novel regioselective and stereoselective indan-1,3-diones grafted spirooxindolopyrrolizidines linked 1,2,3-triazoles *via* one-pot five-component using PEG-400.**

**Rajeswari M, Jayant Sindhu, Harjinder Singh and Jitender M. Khurana \***

Department of Chemistry, University of Delhi, New Delhi -110 007, India.

Fax: +91 11 27666605; Tel: +91 11 27667725; Email: [jmkhurana@chemistry.du.ac.in](mailto:jmkhurana@chemistry.du.ac.in)

**Table of contents**

**Spectral data.....Page 2-13**

**Copies of <sup>1</sup>H and <sup>13</sup>C NMR spectra of compounds.....Page 14-51**

## Spectral data

### 1-*N*-methyl-spiro[2.3']-1'-*N*-((1-(4-fluorophenyl)-1*H*-1,2,3-triazol-4-yl)methyl)oxindole-spiro[3.2'']-indan-1,3-dione- (4-chlorophenyl)-pyrrolidine (6a)

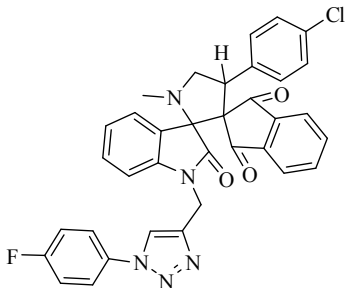

Pale Yellow solid; Yield = 85%; M.p: 202-205 °C ; IR (KBr)  $\nu/\text{cm}^{-1}$  = 2946, 1717, 1515, 1453, 1357, 1233, 1049, 847;  $^1\text{H}$  NMR (400MHz,  $\text{DMSO-}d_6$ )  $\delta_{\text{H}}$  : 8.64 (s, 1H, Ar-H), 7.92-7.89 (m, 2H, Ar-H), 7.68-7.64 (m, 3H, Ar-H), 7.51-7.49 (m, 1H, Ar-H), 7.44-7.40 (m, 2H, Ar-H), 7.10-7.07 (m, 2H, Ar-H), 7.04-7.02 (m, 1H, Ar-H), 6.92-6.89 (m, 4H, Ar-H), 6.75-6.71 (m, 1H, Ar-H), 5.05-5.01 (m, 1H, C-H), 4.97-4.91 (m, 2H, N- $\text{CH}_2$ ), 4.01-3.97 (m, 1H, C-H), 3.61-3.56 (m, 1H, C-H), 2.08 (s, 3H, N- $\text{CH}_3$ );  $^{13}\text{C}$  NMR (100 MHz,  $\text{DMSO-}d_6$ )  $\delta_{\text{C}}$ : 197.3, 196.5, 173.4, 162.9, 161.1, 160.4, 143.0, 142.7, 142.0, 140.7, 136.9, 136.3, 133.1, 132.1, 130.4, 130.1, 124.9, 122.7, 122.7, 122.5, 122.4, 122.2, 121.9, 116.8, 115.2, 115.0, 109.6, 76.8, 69.6, 55.8, 45.2, 34.6, 34.5; LCMS (ESI)  $m/z$  calcd for  $\text{C}_{35}\text{H}_{25}\text{FCIN}_5\text{O}_3$  : 618.1705 [ $\text{M}^+$ ]; found: 619.1709 [ $\text{M}^+ + \text{H}$ ].

### 1-*N*-methyl-spiro[2.3']-1'-*N*-((1-(4-methylphenyl)-1*H*-1,2,3-triazol-4-yl)methyl)oxindole-spiro[3.2'']-indan-1,3-dione- (4-chlorophenyl)-pyrrolidine (6b).

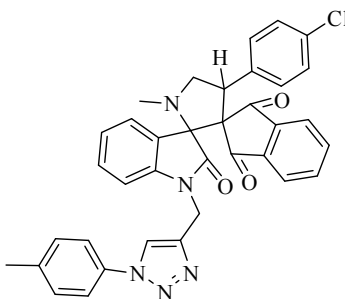

Pale Yellow solid; Yield: 80%; M.p: 196-197°C; IR (KBr)  $\nu/\text{cm}^{-1}$  = 2928, 1717, 1611, 1515, 1463, 1217, 767;  $^1\text{H}$  NMR (400 MHz,  $\text{DMSO-}d_6$ )  $\delta_{\text{H}}$  : 8.58 (s, 1H, Ar-H), 7.74-7.72 (m, 2H, Ar-H), 7.69-7.64 (m, 3H, Ar-H), 7.50-7.48 (m, 1H, Ar-H), 7.37 (d, 2H,  $J$  = 8.54 Hz, Ar-H), 7.19-7.02 (m, 5H, Ar-H), 6.90 (d, 2H,  $J$  = 8.54 Hz, Ar-H), 6.74-6.71 (m, 1H, Ar-H), 5.04-5.00 (m, 1H, C-H), 4.96-4.89 (m, 2H, N- $\text{CH}_2$ ), 4.02-3.98 (m, 1H, C-H), 3.62-3.57 (m, 1H, C-H), 2.34 (s, 3H, Ar- $\text{CH}_3$ ), 2.09 (s, 3H, N- $\text{CH}_3$ );  $^{13}\text{C}$  NMR

(100 MHz, DMSO)  $\delta_C$  : 197.2, 196.2, 173.3, 142.7, 142.7, 142.0, 140.7, 138.4, 136.9, 136.3, 135.1, 134.3, 131.8, 130.3, 130.2, 130.1, 128.3, 124.8, 122.7, 122.6, 122.5, 122.1, 121.4, 119.9, 109.6, 76.8, 69.4, 55.6, 45.0, 34.6, 34.5; LCMS (ESI)  $m/z$  calcd for  $C_{36}H_{28}ClN_5O_3$ : 614.1953 [ $M^+$ ]; found: 614.1947 [ $M^+ + H$ ].

**1-*N*-methyl-spiro[2.3']-1'-*N*-((1-(4-fluorophenyl)-1*H*-1,2,3-triazol-4-yl)methyl)oxindole-spiro[3.2'']-indan-1,3-dione- (4-bromophenyl)-pyrrolidine (6c).**

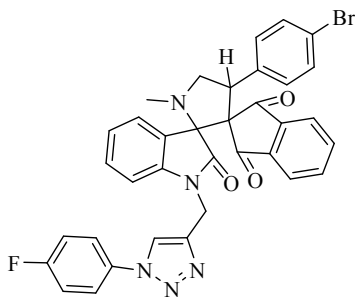

Pale Yellow Solid; Yield: 83%; M.p: 195-199 °C; IR (KBr)  $\nu/cm^{-1}$  = 2932, 1715, 1522, 1492, 1224, 1047, 845;  $^1H$  NMR (400 MHz, DMSO- $d_6$ )  $\delta_H$  : 8.63 (s, 1H, Ar-H), 7.92-7.89 (m, 2H, Ar-H), 7.70-7.64 (m, 3H, Ar-H), 7.51-7.49 (m, 1H, Ar-H), 7.45-7.41 (m, 2H, Ar-H), 7.29-7.27 (m, 2H, Ar-H), 7.06-7.04 (m, 1H, Ar-H), 7.02-6.99 (m, 2H, Ar-H), 6.92-6.89 (m, 2H, Ar-H), 6.75-6.71 (m, 1H, Ar-H), 5.02- 4.97 (m, 1H, C-H), 4.95-4.90 (m, 2H, N-CH<sub>2</sub>), 4.01-3.97 (m, 1H, C-H), 3.62-3.57 (m, 1H, C-H), 2.46 (s, 3H, N-CH<sub>3</sub>);  $^{13}C$  NMR (100 MHz, DMSO- $d_6$ )  $\delta_C$ : 197.3, 196.3, 173.3, 162.2, 161.6, 159.8, 142.9, 142.7, 141.1, 140.7, 136.3, 136.3, 133.0, 133.0, 130.3, 130.0, 124.9, 122.7, 122.6, 122.4, 122.3, 122.1, 121.8, 116.9, 116.6, 115.0, 109.5, 76.7, 69.5, 55.4, 45.1, 34.6, 34.4; LCMS (ESI)  $m/z$  calcd for  $C_{35}H_{25}BrFN_5O_3$ : 662.1198 [ $M^+$ ]; found: 664.1185 [ $M^+ + H$ ], 666.1242 [( $M^+ + H$ ) +2].

**1-*N*-methyl-spiro[2.3']-1'-*N*-((1-(4-methylphenyl)-1*H*-1,2,3-triazol-4-yl)methyl)oxindole-spiro[3.2'']-indan-1,3-dione- (4-fluorophenyl)-pyrrolidine (6d).**

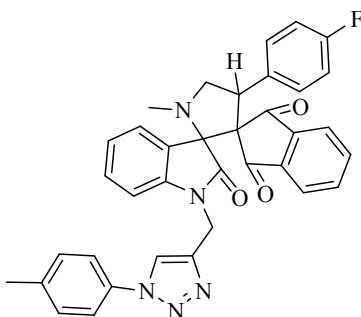

Pale Yellow Solid; Yield: 82%; M.p: 212-214; IR (KBr)  $\nu/\text{cm}^{-1}$  = 2925, 1718, 1605, 1465, 1239, 1046;  $^1\text{H}$  NMR (400 MHz,  $\text{DMSO-}d_6$ )  $\delta_{\text{H}}$  = 8.58 (s, 1H, Ar-H), 7.74-7.72 (m, 2H, Ar-H), 7.67-7.63 (m, 3H, Ar-H), 7.50-7.48 (m, 1H, Ar-H), 7.38-7.36 (m, 2H, Ar-H), 7.11-7.07 (m, 2H, Ar-H), 7.04-7.02 (m, 1H, Ar-H), 6.92-6.90 (m, 4H, Ar-H), 6.75-6.71 (m, 1H, Ar-H), 5.05-5.01 (m, 1H, C-H), 4.96-4.90 (m, 2H, N-CH<sub>2</sub>), 4.02-3.98 (m, 1H, C-H), 3.61-3.57 (m, 1H, C-H), 2.34 (s, 3H, Ar-CH<sub>3</sub>), 2.09 (s, 3H, NCH<sub>3</sub>);  $^{13}\text{C}$  NMR (100 MHz,  $\text{DMSO-}d_6$ )  $\delta_{\text{C}}$  = 197.3, 196.3, 173.4, 161.1, 142.8, 142.7, 142.0, 140.7, 138.4, 136.9, 136.3, 134.3, 132.1, 130.4, 130.3, 130.0, 124.9, 122.7, 122.4, 122.1, 121.4, 119.9, 115.1, 109.6, 76.7, 69.5, 55.8, 45.1, 34.6, 34.5, 20.5; HRMS (ESI)  $m/z$  calcd for  $\text{C}_{36}\text{H}_{28}\text{FN}_5\text{O}_3$ : 598.2249 [ $\text{M}^+$ ]; found: 598.2241 [ $\text{M}^++\text{H}$ ], 600.2299 [ $(\text{M}^++\text{H})+2$ ].

**1-*N*-methyl-spiro[2.3']-1'-*N*-((1-(4-methylphenyl)-1*H*-1,2,3-triazol-4-yl)methyl)oxindole-spiro[3.2'']-indan-1,3-dione- (4-bromophenyl)-pyrrolidine (6e).**

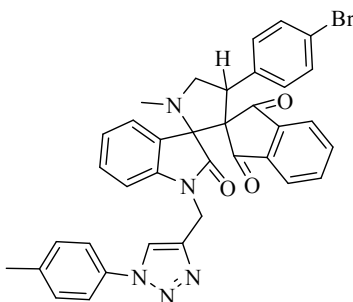

Pale Yellow solid; Yield: 81%; M.p: 226-228°C; IR (KBr)  $\nu/\text{cm}^{-1}$  = 2926, 1719, 1611, 1466, 1242, 1171, 578;  $^1\text{H}$  NMR (400 MHz,  $\text{DMSO-}d_6$ )  $\delta_{\text{H}}$  = 8.60 (s, 1H, Ar-H), 7.77-7.75 (m, 2H, Ar-H), 7.70-7.68 (m, 3H, Ar-H), 7.52-7.50 (m, 1H, Ar-H), 7.41-7.39 (m, 2H, Ar-H), 7.09-7.07 (m, 2H, Ar-H), 7.05-7.02 (m, 3H, Ar-H), 6.94-6.92 (m, 2H, Ar-H), 6.77-6.73 (m, 1H, Ar-H), 5.05-5.03 (m, 1H, C-H), 5.01-4.92 (m, 2H, N-CH<sub>2</sub>), 4.05-4.00 (m, 1H, C-H), 3.65-3.60 (m, 1H, C-H), 2.37 (s, 3H, Ar-CH<sub>3</sub>), 2.11 (s, 3H, N-CH<sub>3</sub>);  $^{13}\text{C}$  NMR (100 MHz,  $\text{DMSO-}d_6$ )  $\delta_{\text{C}}$  = 197.1, 196.2, 173.3, 142.7, 142.7, 141.9, 141.9, 140.7,



138.4, 137.0, 136.3, 135.5, 134.2, 131.2, 130.6, 130.3, 130.1, 124.8, 122.7, 122.6, 122.5, 122.2, 121.4, 120.4, 119.9, 109.6, 76.9, 69.3, 55.5, 45.0, 34.6, 34.5, 20.5; LCMS (ESI)  $m/z$  calcd. for  $C_{36}H_{28}BrN_5O_3$  : 658.1448  $[M^+]$ ; found: 658.1455  $[M^+ + H]$ , 660.1428  $[(M^+ + H) + 2]$ .

**1-*N*-methyl-spiro[2.3']-1'-*N*-((1-(4-fluorophenyl)-1*H*-1,2,3-triazol-4-yl)methyl)oxindole-spiro[3.2'']-indan-1,3-dione- (4-fluorophenyl)-pyrrolidine (6f).**

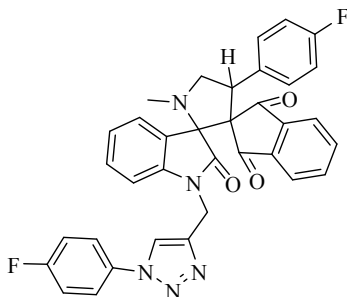

Pale Yellow Solid; Yield: 84%; M.p: 186-188; IR (KBr)  $\nu/cm^{-1}$  = 2947, 1719, 1604, 1473, 1249, 1032;  $^1H$  NMR (400 MHz, DMSO- $d_6$ )  $\delta_H$ : 8.64 (s, 1H, Ar-H), 7.94-7.89 (m, 2H, Ar-H), 7.68-7.62 (m, 3H, Ar-H), 7.51-7.49 (m, 1H, Ar-H), 7.45-7.40 (m, 3H, Ar-H), 7.11-7.07 (m, 2H, Ar-H), 7.04-7.02 (m, 1H, Ar-H), 6.93-6.89 (m, 3H, Ar-H), 6.75-6.71 (m, 1H, Ar-H), 5.06-5.01 (m, 1H, C-H), 4.97-4.91 (m, 2H, N-CH<sub>2</sub>), 4.02-3.98 (m, 1H, C-H), 3.62-3.57 (m, 1H, C-H), 2.09 (s, 3H, N-CH<sub>3</sub>);  $^{13}C$  NMR (100 MHz, DMSO- $d_6$ )  $\delta_C$ : 197.3, 196.3, 173.3, 162.2, 161.6, 159.8, 142.9, 142.7, 141.9, 140.7, 136.8, 136.3, 133.0, 132.0, 130.3, 130.0, 124.9, 122.7, 122.6, 122.4, 122.1, 121.8, 116.9, 116.6, 115.0, 109.5, 76.7, 69.5, 55.8, 45.1, 34.6, 34.4; LCMS (ESI)  $m/z$  calcd. for  $C_{35}H_{25}F_2N_5O_3$ : 602.1998  $[M^+]$ ; found: 602.1998  $[M^+ + H]$ .

**1-*N*-methyl-spiro[2.3']-1'-*N*-((1-(4-nitrophenyl)-1*H*-1,2,3-triazol-4-yl)methyl)oxindole-spiro[3.2'']-indan-1,3-dione- (4-chlorophenyl)-pyrrolidine (6g).**

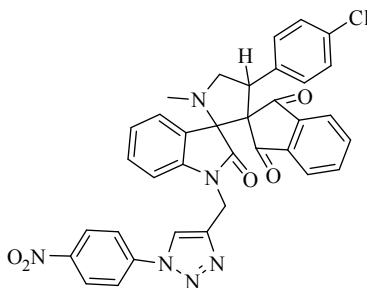

Pale Yellow Solid; Yield: 82%; M.p: 199-202°C; IR (KBr)  $\nu/cm^{-1}$  = 2939, 1717, 1609, 1525, 1491, 1342, 750;  $^1H$  NMR (400 MHz, DMSO- $d_6$ )  $\delta_H$  = 8.88 (s, 1H, Ar-H), 8.43-8.41 (m, 2H, Ar-H), 8.21-8.18

(m, 2H, Ar-H), 7.71-7.67 (m, 2H, Ar-H), 7.65-7.63(m, 2H, Ar-H, 7.52-7.51 (m, 1H, Ar-H), 7.15-7.13 (m, 2H, Ar-H), 7.07-7.05 (m, 2H, Ar-H), 6.94-6.90 (m, 2H, Ar-H), 6.75-6.71 (m, 1H, Ar-H), 5.04-5.02 (m, 1H, C-H), 4.99-4.96 (m, 2H, N-CH<sub>2</sub>), 4.02-3.98 (m, 1H, C-H), 3.62-3.57 (m, 1H, C-H), 2.09 (s, 3H, N-CH<sub>3</sub>) ; <sup>13</sup>C NMR (100 MHz, DMSO-*d*<sub>6</sub>) δ<sub>C</sub> = 197.1, 196.1, 173.3, 146.7, 143.5, 142.6, 141.9, 140.6, 136.9, 136.2, 135.0, 131.8, 130.2, 130.0, 128.2, 125.6, 124.8, 122.6, 122.1, 120.6, 109.5, 76.7, 69.4, 55.5, 45.0, 34.5, 34.4; LCMS (ESI) *m/z* calcd. for C<sub>35</sub>H<sub>25</sub>ClN<sub>6</sub>O<sub>5</sub>: 645.1648 [M<sup>+</sup>]; found: 645.1636 [M<sup>+</sup> +H], 647.1629 [(M<sup>+</sup> +H) +2].

**1-*N*-methyl-spiro[2.3']-1'-*N*-((1-(4-nitrophenyl)-1*H*-1,2,3-triazol-4-yl)methyl)oxindole-spiro[3.2'']-indan-1,3-dione- (4-bromophenyl)-pyrrolidine (6h).**

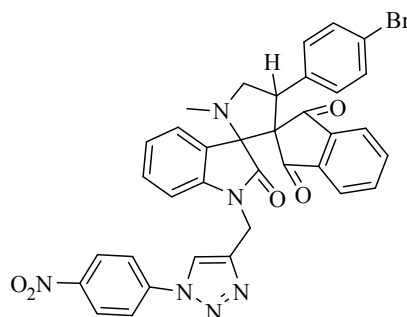

Pale Yellow Solid; Yield: 86%; M.p: 200-203°C; IR (KBr) *v*/cm<sup>-1</sup> = 2924, 1717, 1599, 1341, 1261, 1167, 750; <sup>1</sup>H NMR (400 MHz, DMSO-*d*<sub>6</sub>) δ<sub>H</sub> = 8.88 (s, 1H, Ar-H), 8.44-8.41 (m, 2H, Ar-H), 8.21-8.19 (m, 2H, Ar-H), 7.70-7.64 (m, 3H, Ar-H), 7.53-7.51 (m, 1H, Ar-H), 7.29-7.27 (m, 2H, Ar-H), 7.07-7.03 (m, 1H, Ar-H), 7.01-6.99 (m, 2H, Ar-H), 6.94-6.90 (m, 2H, Ar-H), 6.75-6.71 (m, 1H, Ar-H), 5.06-5.02 (m, 1H, C-H), 4.99-4.94 (m, 2H, N-CH<sub>2</sub>), 4.02-3.98 (m, 1H, C-H), 3.62-3.57 (m, 1H, C-H), 2.09 (s, 1H, N-CH<sub>3</sub>); <sup>13</sup>C NMR(100 MHz, DMSO-*d*<sub>6</sub>) δ<sub>C</sub> = 197.1, 196.1, 173.3, 146.7, 143.5, 142.6, 141.9, 140.7, 136.9, 136.9, 136.3, 135.5, 131.1, 130.5, 130.0, 125.6, 124.8, 122.6, 122.1, 120.6, 120.3, 109.5, 76.8, 69.3, 55.5, 45.0, 34.5, 34.4; LCMS (ESI) *m/z* calcd. for C<sub>35</sub>H<sub>25</sub>BrN<sub>6</sub>O<sub>5</sub>: 689.1143 [M<sup>+</sup>]; found: 691.1128 [(M<sup>+</sup> +H) +2].

**1-*N*-methyl-spiro[2.3']-1'-*N*-((1-(4-nitrophenyl)-1*H*-1,2,3-triazol-4-yl)methyl)oxindole-spiro[3.2'']-indan-1,3-dione- (4-methylphenyl)-pyrrolidine (6i).**

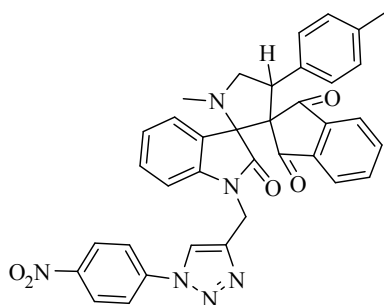

Pale Yellow Solid; Yield: 79%; M.p: 185-187°C; IR (KBr)  $\nu/\text{cm}^{-1}$  = 2924, 1717, 1599, 1524, 1341, 1261, 1109;  $^1\text{H}$  NMR (400 MHz,  $\text{DMSO-}d_6$ )  $\delta_{\text{H}}$  = 8.89 (s, 1H, Ar-H), 8.44-8.42 (m, 2H, Ar-H), 8.21-8.19 (m, 2H, Ar-H), 7.69-7.61 (m, 3H, Ar-H), 7.52-7.50 (m, 1H, Ar-H), 7.06-7.02 (m, 1H, Ar-H), 6.93-6.91 (m, 4H, Ar-H), 6.88-6.86 (m, 2H, Ar-H), 6.75-6.71 (m, 1H, Ar-H), 5.03-5.02 (m, 1H, C-H), 4.99-4.94 (m, 2H, N-CH<sub>2</sub>), 4.02-3.98 (m, 1H, C-H), 3.57-3.53 (m, 1H, C-H), 2.09 (s, 3H, Ar-CH<sub>3</sub>), 2.05 (s, 3H, N-CH<sub>3</sub>);  $^{13}\text{C}$  NMR (100 MHz,  $\text{CDCl}_3$ )  $\delta_{\text{C}}$  : 198.9, 196.9, 174.3, 147.2, 144.7, 142.7, 142.5, 141.3, 141.2, 136.9, 135.9, 135.1, 132.5, 130.0, 128.9, 128.7, 126.0, 125.5, 123.3, 122.9, 122.8, 122.1, 121.5, 120.3, 108.8, 70.3, 56.5, 47.2, 35.2, 20.8; LCMS (ESI)  $m/z$  calcd. for  $\text{C}_{36}\text{H}_{28}\text{N}_6\text{O}_5$ : 625.2185 [ $\text{M}^+$ ]; found: 625.2185 [ $\text{M}^+ + \text{H}$ ].

**1-N-methyl-spiro[2.3']-1'-N-((1-(4-methoxyphenyl)-1H-1,2,3-triazol-4-yl)methyl)oxindole-spiro[3.2'']-indan-1,3-dione- (4-nitrophenyl)-pyrrolidine (6j).**

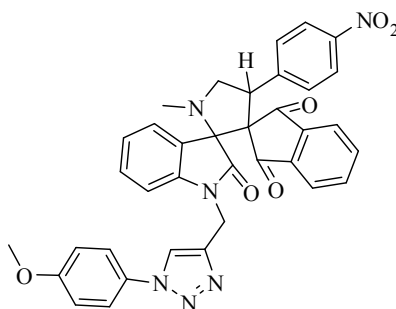

Pale Yellow solid; Yield: 87%; M.p: 174-178°C; IR (KBr)  $\nu/\text{cm}^{-1}$  = 2946, 1717, 1515, 1453, 1357, 1233, 1049;  $^1\text{H}$  NMR (400 MHz,  $\text{DMSO-}d_6$ )  $\delta_{\text{H}}$  = 8.53 (s, 1H, Ar-H), 7.97-7.95 (m, 2H, Ar-H), 7.78-7.75 (m, 2H, Ar-H), 7.69-7.63 (m, 3H, Ar-H), 7.50-7.48 (m, 1H, Ar-H), 7.35-7.33 (m, 2H, Ar-H), 7.12-7.10 (m, 2H, Ar-H), 7.05-7.02 (m, 1H, Ar-H), 6.93-6.88 (m, 2H, Ar-H), 6.75-6.71 (m, 1H, Ar-H), 5.17-5.12 (m, 1H, C-H), 5.01-4.89 (m, 2H, N-CH<sub>2</sub>), 4.11-4.07 (m, 1H, C-H), 3.78 (s, 3H, O-CH<sub>3</sub>), 3.70-3.65 (m, 1H, C-H), 2.10 (s, 3H, N-CH<sub>3</sub>);  $^{13}\text{C}$  NMR (100 MHz,  $\text{DMSO-}d_6$ )  $\delta_{\text{C}}$  = 197.4, 196.4, 173.4, 161.6, 146.9, 146.2, 142.9, 142.7, 142.7, 142.0, 140.7, 136.8, 136.2, 133.0, 129.9, 129.4, 124.9, 122.9, 122.8,

122.6, 122.3, 122.1, 121.9, 121.8, 116.7, 109.5, 108.5, 107.9, 100.8, 76.7, 69.5, 55.9, 55.7, 34.5, 34.4; LCMS (ESI)  $m/z$  calcd. for  $C_{36}H_{28}N_6O_6$ : 641.2143 [ $M^+$ ]; found: 641.2135 [ $M^+ + H$ ].

**1-*N*-methyl-spiro[2.3']-1'-*N*-((1-(4-nitrophenyl)-1*H*-1,2,3-triazol-4-yl)methyl)oxindole-spiro[3.2']-indan-1,3-dione- (4-fluorophenyl)-pyrrolidine (6k).**

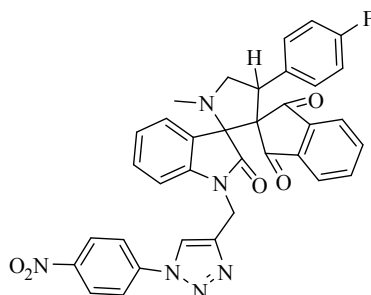

Pale Yellow solid, Yield: 82%; M.p: 199-203°C; IR (KBr)  $\nu/cm^{-1}$  = 2939, 1742, 1609, 1560, 1466, 1343, 1229, 1162;  $^1H$  NMR (400 MHz,  $DMSO-d_6$ )  $\delta_H$  = 8.90 (s, 1H, Ar-H), 8.44-8.42 (m, 2H, Ar-H), 8.21-8.19 (m, 2H, Ar-H), 7.70-7.63 (m, 3H, Ar-H), 7.53-7.51 (m, 1H, Ar-H), 7.10-7.03 (m, 3H, Ar-H), 6.94-6.92 (m, 2H, Ar-H), 6.91-6.89 (m, 2H, Ar-H), 6.75-6.72 (m, 1H, Ar-H), 5.06-5.02 (m, 1H, C-H), 5.00-4.95 (m, 2H, N- $CH_2$ ), 4.01-3.97 (m, 1H, C-H), 3.61-3.56 (m, 1H, C-H), 2.09 (s, 3H, N- $CH_3$ );  $^{13}C$  NMR (100 MHz,  $DMSO-d_6$ )  $\delta_C$  = 197.3, 196.3, 173.4, 161.1, 146.7, 143.6, 142.7, 142.0, 140.7, 136.9, 136.3, 132.0, 130.4, 130.1, 125.7, 124.9, 122.8, 122.6, 122.6, 122.2, 120.6, 115.1, 109.6, 76.7, 69.5, 55.8, 45.2, 34.6, 34.4; LCMS (ESI)  $m/z$  calcd. for  $C_{36}H_{28}FN_6O_6$  : 629.1943 [ $M^+$ ]; found: 629.1929 [ $M^+ + H$ ], 631.1984 [( $M^+ + H$ ) + 2].

**1-*N*-methyl-spiro[2.3']-1'-*N*-((1-(4-nitrophenyl)-1*H*-1,2,3-triazol-4-yl)methyl)oxindole-spiro[3.2']-indan-1,3-dione- (4-(trifluoromethyl)phenyl)-pyrrolidine (6l).**

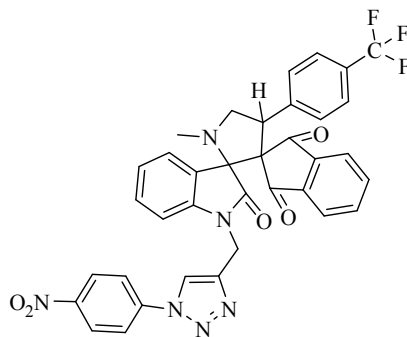

Pale Yellow Solid; Yield: 87%; M.p: 174-178°C; IR (KBr)  $\nu/cm^{-1}$  = 2938, 1717, 1611, 1523, 1313, 1233, 1129, 855;  $^1H$  NMR (400 MHz,  $DMSO-d_6$ )  $\delta_H$  = 8.92 (s, 1H, Ar-H), 8.47-8.44 (m, 2H, Ar-H),

8.24-8.22 (m, 2H, Ar-H), 7.70-7.65 (m, 3H, Ar-H), 7.56-7.54 (m, 1H, Ar-H), 7.50-7.48 (m, 2H, Ar-H), 7.31-7.29 (m, 2H, Ar-H), 7.10-7.06 (m, 1H, Ar-H), 6.98-6.93 (m, 2H, Ar-H), 6.78-6.75 (m, 1H, Ar-H), 5.16-5.11 (m, 1H, C-H), 5.07-4.97 (m, 2H, N-CH<sub>2</sub>), 4.12-4.08 (m, 1H, C-H), 3.71-3.66 (m, 1H, C-H), 2.14 (s, 3H, N-CH<sub>3</sub>); <sup>13</sup>C NMR (100 MHz, DMSO-*d*<sub>6</sub>) δ<sub>C</sub> = 196.9, 196.0, 173.3, 146.7, 143.4, 142.6, 141.9, 141.1, 140.7, 140.6, 136.9, 136.3, 133.6, 130.1, 129.2, 127.9, 127.5, 125.6, 125.1, 124.8, 122.6, 122.4, 122.20, 120.6, 109.5, 76.9, 69.4, 55.4, 45.1, 34.6, 34.4; LCMS (ESI) *m/z* calcd. for C<sub>36</sub>H<sub>25</sub>F<sub>3</sub>N<sub>6</sub>O<sub>5</sub> : 679.1911[M<sup>+</sup>]; found: 679.1893 [M<sup>+</sup>+H].

**1-*N*-methyl-spiro[2.3']-1'-*N*-((1-(7-chloroquinoline)-1*H*-1,2,3-triazol-4-yl)methyl)oxindole-spiro[3.2'']-indan-1,3-dione- (4-(trifluoromethyl)phenyl)-pyrrolidine (6m).**

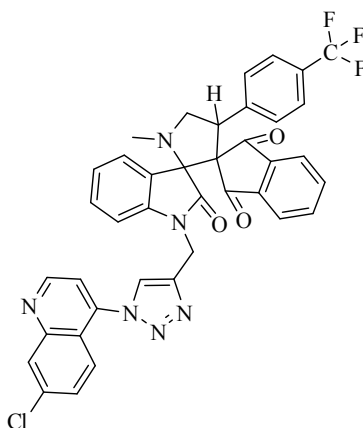

Pale Yellow Solid; Yield: 80%; M.p: 148-151°C; IR (KBr) ν/cm<sup>-1</sup> = 2946, 1717, 1515, 1453, 1357, 1233, 1049, 847; <sup>1</sup>H NMR (400MHz, DMSO-*d*<sub>6</sub>) δ<sub>H</sub> = 9.13-9.11(m, 1H, Ar-H), 8.70 (s, 1H, Ar-H), 8.25-8.24 (m, 1H, Ar-H), 7.96-7.93 (m, 1H, Ar-H), 7.81-7.80 (m, 1H, Ar-H), 7.75-7.73 (m, 1H, Ar-H), 7.68-7.63 (m, 4H, Ar-H), 7.49-7.45(m, 3H, Ar-H), 7.27-7.25 (m, 2H, Ar-H), 7.08-7.06 (m, 1H, Ar-H), 7.00-6.98 (m, 1H, Ar-H), 6.92-6.90 (m, 1H, Ar-H), 6.77-6.73 (m, 1H, Ar-H), 5.12-5.10 (m, 1H, C-H), 5.06-4.99 (m, 2H, N-CH<sub>2</sub>), 4.09-4.05 (m, 1H, C-H), 3.67-3.62 (m, 1H, C-H), 2.11 (s, 3H, N-CH<sub>3</sub>); <sup>13</sup>C NMR (100 MHz, DMSO-*d*<sub>6</sub>) δ<sub>C</sub> = 197.1, 196.2, 173.3, 152.5, 149.4, 142.7, 142.7, 142.0, 141.2, 140.7, 140.5, 137.1, 136.5, 135.5, 130.3, 129.3, 129.1, 128.2, 125.9, 125.8, 125.3, 125.0, 124.8, 122.8, 122.7, 122.6, 122.4, 120.4, 117.2, 77.1, 69.5, 55.6, 45.1, 34.7, 28.3; LCMS (ESI) *m/z* calcd. for C<sub>39</sub>H<sub>26</sub>ClF<sub>3</sub>N<sub>6</sub>O<sub>3</sub>: 719.1780 [M<sup>+</sup>]; found: 719.1749 [M<sup>+</sup>+H], 721.1742 [(M<sup>+</sup>+H)+2].

**1-*N*-methyl-spiro[2.3']-1'-*N*-((1-(4-fluorophenyl)-1*H*-1,2,3-triazol-4-yl)methyl)oxindole-spiro[3.2'']-indan-1,3-dione- (4-(trifluoromethyl)phenyl)-pyrrolidine (6n).**

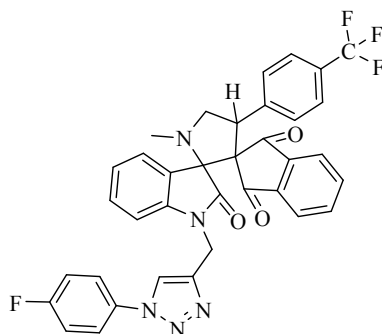

Pale Yellow solid; Yield: 85%; M.p: 162-166°C; IR (KBr)  $\nu/\text{cm}^{-1}$  = 2939, 1744, 1609, 1516, 1487, 1169;  $^1\text{H}$  NMR (400 MHz, DMSO- $d_6$ )  $\delta_{\text{H}}$  = 8.64 (s, 1H, Ar-H), 7.93-7.89 (m, 2H, Ar-H), 7.68-7.64 (m, 2H, Ar-H), 7.50-7.40 (m, 6H, Ar-H), &.28-7.26 (m, 2H, Ar-H), 7.06-7.02 (m, 1H, Ar-H), 6.92-6.89 (m, 2H, Ar-H), 6.74-6.71 (m, 1H, Ar-H), 5.13-5.08 (m, 1H, C-H), 5.00-4.90 (m, 2H, N-CH<sub>2</sub>), 4.09-4.05 (m, 1H, C-H), 3.67-3.62 (m, 1H, C-H), 2.10 (s, 3H, N-CH<sub>3</sub>);  $^{13}\text{C}$  NMR (100 MHz, DMSO- $d_6$ )  $\delta_{\text{C}}$  = 196.9, 196.0, 173.3, 142.9, 142.7, 141.9, 141.2, 140.6, 137.0, 136.4, 133.1, 130.1, 129.2, 125.2, 124.87, 123.4, 122.7, 122.6, 122.4, 122.2, 121.9, 116.8, 109.6, 76.9, 69.4, 56.0, 55.4, 45.1, 34.6, 34.4; LCMS (ESI)  $m/z$  calcd. for C<sub>36</sub>H<sub>25</sub>F<sub>4</sub>N<sub>5</sub>O<sub>3</sub>: 652.1966 [M<sup>+</sup>]; found: 652.1963 [M<sup>+</sup> +H], 654.2019 [(M<sup>+</sup> +H) +2].

**1-N-methyl-spiro[2.3']-1'-N-((1-(7-chloroquinoline)-1H-1,2,3-triazol-4-yl)methyl)oxindole-spiro[3.2'']-indan-1,3-dione-(4-methylphenyl)-pyrrolidine (60).**

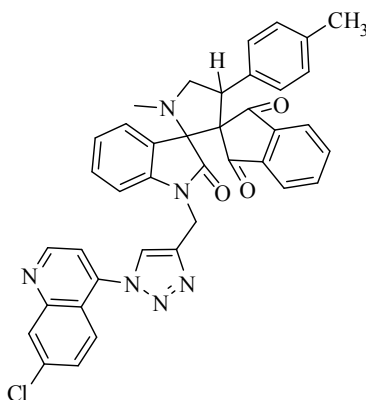

Pale Yellow solid; Yield: 74%; M.p: 133-135°C; IR (KBr)  $\nu/\text{cm}^{-1}$  = 2861, 1711, 1614, 1467, 1352, 1173, 757;  $^1\text{H}$  NMR (400 MHz, DMSO- $d_6$ )  $\delta_{\text{H}}$  = 9.14-9.13 (m, 1H, Ar-H), 8.70 (s, 1H, Ar-H), 8.26-8.25 (m, 1H, Ar-H), 7.95-7.93 (m, 1H, Ar-H), 7.81-7.80 (m, 1H, Ar-H), 7.75-7.72 (m, 1H, Ar-H), 7.67-7.61 (m, 3H, Ar-H), 7.48-7.46 (m, 1H, Ar-H), 7.09-7.05 (m, 1H, Ar-H), 6.98-6.97 (m, 1H, Ar-H), 6.93-6.91 (m, 3H, Ar-H), 6.88-6.86 (m, 2H, Ar-H), 6.76-6.72 (m, 1H, Ar-H), 5.06-5.03 (m, 1H, C-H), 5.01-4.95 (m, 2H, N-CH<sub>2</sub>), 4.03-3.98 (m, 1H, C-H), 3.57-3.53 (m, 1H, C-H), 2.10 (s, 3H, CH<sub>3</sub>), 2.04 (s, 3H, N-CH<sub>3</sub>);  $^{13}\text{C}$  NMR (100 MHz, DMSO- $d_6$ )  $\delta_{\text{C}}$  = 197.6, 196.4, 173.5, 152.5, 149.4, 147.0, 142.7, 142.1,

140.7, 140.3, 136.8, 136.4, 136.2, 135.5, 132.8, 130.0, 129.0, 128.9, 128.3, 128.2, 125.8, 125.2, 124.9, 122.6, 122.5, 122.2, 120.4, 117.1, 109.7, 99.4, 98.6, 81.4, 76.8, 69.6, 55.8, 45.5, 34.7, 34.5, 20.4; LCMS (ESI)  $m/z$  calcd. for  $C_{39}H_{29}ClN_6O_3$ : 665.2062 [ $M^+$ ]; found: 666.2060 [ $M^+ + H$ ].

**1-*N*-methyl-spiro[2.3']-1'-*N*-((1-(*n*-butylazide)-1*H*-1,2,3-triazol-4-yl)methyl)oxindole-spiro[3.2']-indan-1,3-dione- (furfuraldehyde)-pyrrolidine (6p).**

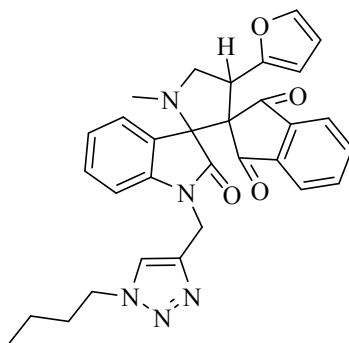

Pale Yellow Solid; Yield: 80%; M.p: 184-188°C; IR (KBr)  $\nu/cm^{-1}$  = 2924, 1717, 1610, 1465, 1339, 1265, 765, 720;  $^1H$  NMR (400 MHz,  $DMSO-d_6$ )  $\delta_H$  = 7.89 (s, 1H, Ar-H), 7.75-7.68 (m, 3H, Ar-H), 7.65-7.63 (m, 1H, Ar-H), 7.11 (s, 1H, Ar-H), 7.01-6.98 (t, 1H, Ar-H), 6.85-6.78 (dd, 2H, Ar-H), 6.70-6.67 (t, 1H, Ar-H), 6.15-6.11 (m, 2H, Ar-H), 4.97-4.92 (t, 1H, -CH), 4.88-4.78 (q, 2H, -CH<sub>2</sub>), 4.31-4.29 (t, 2H, -NCH<sub>2</sub>), 3.86-3.82 (t, 1H, -CH), 3.60-3.56 (t, 1H, -CH), 1.71-1.67 (m, 2H, -CH<sub>2</sub>), 1.16-1.07 (m, 2H, -CH<sub>2</sub>), 0.78-0.75 (t, 3H, -CH<sub>3</sub>);  $^{13}C$  NMR (100 MHz,  $DMSO-d_6$ )  $\delta_C$  = 197.1, 196.3, 173.7, 151.5, 143.2, 142.7, 142.0, 141.3, 137.2, 136.6, 130.5, 125.1, 123.7, 123.2, 122.9, 122.3, 111.0, 110.2, 107.6, 79.9, 67.8, 55.1, 49.3, 35.2, 34.7, 32.3, 30.8, 19.6, 13.5; LCMS (ESI)  $m/z$  calcd. for  $C_{31}H_{29}N_5O_4$ : 536.2289 [ $M^+$ ]; found: 536.2290 [ $M^+ + H$ ].

**1-*N*-methyl-spiro[2.3']-1'-*N*-((1-(4-fluorophenyl)-1*H*-1,2,3-triazol-4-yl)methyl)oxindole-spiro[3.2']-indan-1,3-dione-(piperonal)-pyrrolidine (6q).**

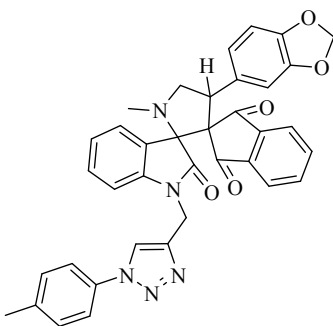

Pale Yellow Solid; Yield: 86%; M.p: 182-186°C; IR (KBr)  $\nu/\text{cm}^{-1}$  = 2944, 1717, 1609, 1468, 1348, 1234, 1169, 1042;  $^1\text{H}$  NMR (400 MHz, DMSO- $d_6$ )  $\delta_{\text{H}}$  = 8.65 (s, 1H, Ar-H), 7.99-7.88 (m, 3H, Ar-H), 7.71-7.68 (m, 3H, Ar-H), 7.55-7.52 (m, 1H, Ar-H), 7.47-7.43 (m, 3H, Ar-H), 7.09-7.05 (m, 1H, Ar-H), 6.96-6.92 (m, 2H, Ar-H), 6.77-6.74 (m, 1H, Ar-H), 6.66-6.61 (m, 2H, Ar-H), 6.51-6.49 (m, 1H, Ar-H), 5.86-5.84 (m, 2H, O-CH<sub>2</sub>-O), 5.05-5.03 (m, 1H, C-H), 4.99-4.97 (m, 2H, N-CH<sub>2</sub>), 3.99-3.95 (m, 1H, C-H), 3.60-3.55 (m, 1H, C-H), 2.11 (s, 3H, N-CH<sub>3</sub>);  $^{13}\text{C}$  NMR (100 MHz, DMSO- $d_6$ )  $\delta_{\text{C}}$  = 197.4, 196.4, 173.4, 146.9, 146.2, 142.9, 142.7, 142.0, 140.7, 136.8, 136.2, 133.0, 129.9, 129.4, 124.9, 122.9, 122.8, 122.6, 122.4, 122.3, 122.2, 122.1, 121.9, 121.8, 116.9, 116.6, 109.5, 108.5, 107.9, 100.8, 76.7, 69.5, 55.9, 45.7, 34.5, 34.4; LCMS (ESI)  $m/z$  calcd. for C<sub>36</sub>H<sub>26</sub>FN<sub>5</sub>O<sub>5</sub> : 628.1991 [M<sup>+</sup>]; found: 628.1975 [M<sup>+</sup> +H].

**1-*N*-methyl-spiro[2.3']-1'-*N*-((1-(7-chloroquinoline)-1*H*-1,2,3-triazol-4-yl)methyl)oxindole-spiro[3.2'']-indan-1,3-dione-(isobutyl)-pyrrolidine (6r).**

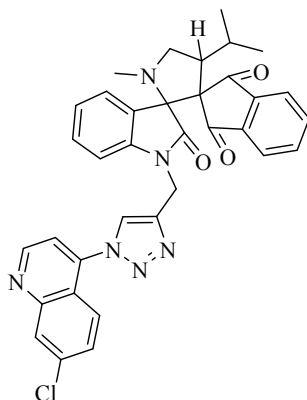

Pale Yellow Solid; Yield: 78%; M.p: 190-193°C; IR (KBr)  $\nu/\text{cm}^{-1}$  = 2967, 1727, 1621, 1458, 1344, 1263, 1173, 1026, 765;  $^1\text{H}$  NMR (400 MHz, DMSO- $d_6$ )  $\delta_{\text{H}}$  = 9.13-9.12 (m, 1H, Ar-H), 8.64 (s, 1H, Ar-H), 8.24-8.21 (m, 1H, Ar-H), 7.96-7.94 (m, 1H, Ar-H), 7.82-7.63 (m, 5H, Ar-H), 7.43-7.41 (m, 1H, Ar-H), 7.04-7.00 (m, 1H, Ar-H), 6.93-6.91 (m, 1H, Ar-H), 6.83-6.81 (m, 1H, Ar-H), 6.70-6.67 (m, 1H, Ar-H), 5.03-4.88 (m, 2H, CH<sub>2</sub>), 3.45-3.38 (m, 2H, CH<sub>2</sub>), 2.45 (m, 1H, -CH), 1.99 (s, 3H, NCH<sub>3</sub>), 1.76-1.68 (brs, 1H, -CH), 0.87-0.81 (m, 3H, CH<sub>3</sub>), 0.25-0.23 (m, 3H, CH<sub>3</sub>);  $^{13}\text{C}$  NMR (100 MHz, DMSO- $d_6$ )  $\delta_{\text{C}}$  = 197.8, 197.2, 173.4, 152.4, 149.3, 142.6, 142.5, 141.7, 140.3, 136.5, 136.0, 135.3, 129.9, 128.9, 128.1, 125.8, 125.2, 124.5, 122.6, 122.5, 122.4, 121.9, 120.3, 117.0, 109.4, 77.5, 67.2, 57.7, 47.9, 34.6, 34.2, 29.1, 21.8, 21.7; LCMS (ESI)  $m/z$  calcd. for C<sub>35</sub>H<sub>29</sub>ClN<sub>6</sub>O<sub>3</sub> : 617.2062 [M<sup>+</sup>]; found: 617.2055 [M<sup>+</sup> +H].

**1-*N*-methyl-spiro[2.3']-1'-*N*-((1-(4-methoxyphenyl)-1*H*-1,2,3-triazol-4-yl)methyl)oxindole-spiro[3.2'']-indan-1,3-dione- (isobutyl)-pyrrolidine (6s).**



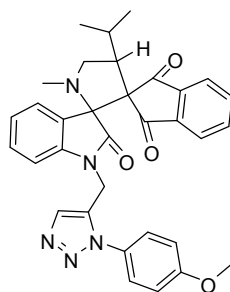

Pale Yellow Solid; Yield: 74%; M.p: 204-206°C; IR (KBr)  $\nu/\text{cm}^{-1}$  = 2933, 1726, 1601, 1468, 1343, 1263, 1169, 767;  $^1\text{H}$  NMR (400 MHz,  $\text{DMSO-}d_6$ )  $\delta_{\text{H}}$  = 8.45 (s, 1H, Ar-H), 7.81-7.74 (m, 4H, Ar-H), 7.68-7.65 (m, 1H, Ar-H), 7.43-7.41 (m, 1H, Ar-H), 7.12-7.10 (m, 2H, Ar-H), 7.00-6.96 (m, 1H, Ar-H), 6.84-6.79 (m, 2H, Ar-H), 6.68-6.64 (m, 1H, Ar-H), 4.92-4.77 (m, 2H, -CH<sub>2</sub>), 3.82-3.80 (m, 1H, C-H), 3.78 (s, 3H, O-CH<sub>3</sub>), 3.45-3.36 (m, 2H, -CH<sub>2</sub>), 1.96 (s, 3H, N-CH<sub>3</sub>), 1.76-1.70 (m, 1H, C-H), 0.83-0.82 (m, 3H, -CH<sub>3</sub>), 0.26-0.24 (m, 3H, -CH<sub>3</sub>);  $^{13}\text{C}$  NMR (100 MHz,  $\text{DMSO-}d_6$ )  $\delta_{\text{C}}$  = 197.8, 197.2, 173.3, 159.3, 142.6, 142.5, 141.7, 140.3, 136.6, 136.1, 129.9, 124.6, 122.6, 122.5, 122.3, 121.9, 121.7, 121.4, 114.9, 109.3, 77.5, 67.2, 57.7, 55.5, 47.8, 34.6, 34.3, 29.1, 21.9, 21.7; LCMS (ESI)  $m/z$  calcd. for  $\text{C}_{33}\text{H}_{31}\text{N}_5\text{O}_4$ : 562.2449 [ $\text{M}^+$ ]; found: 562.2461 [ $\text{M}^+ + \text{H}$ ].

Figure 1.  $^1\text{H}$  NMR spectrum of compound **6a** (400 MHz,  $\text{CDCl}_3$ )

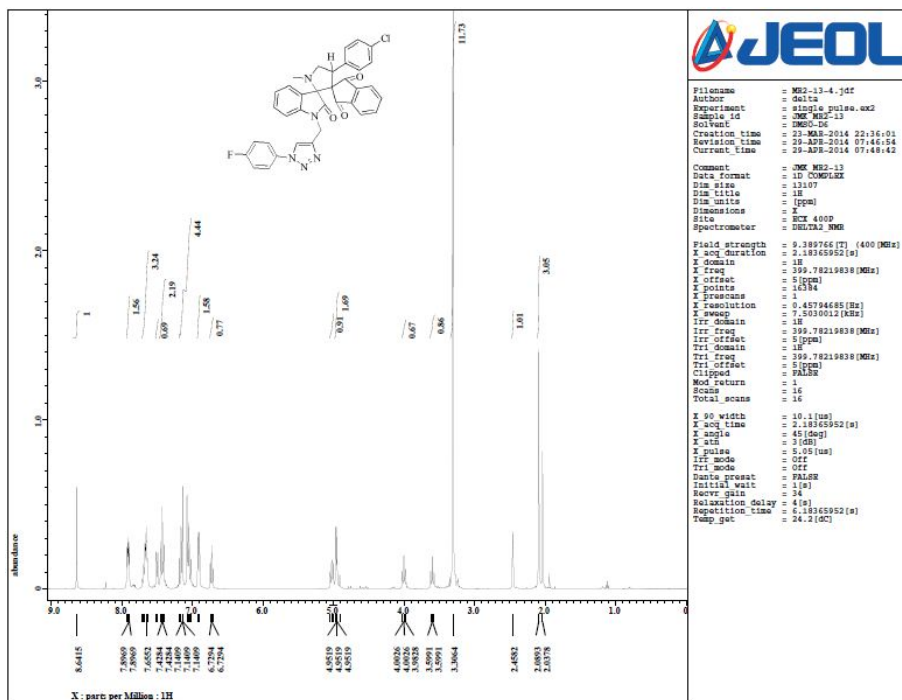

Figure 2.  $^{13}\text{C}$  NMR spectrum of compound **6a** (100 MHz,  $\text{CDCl}_3$ ).

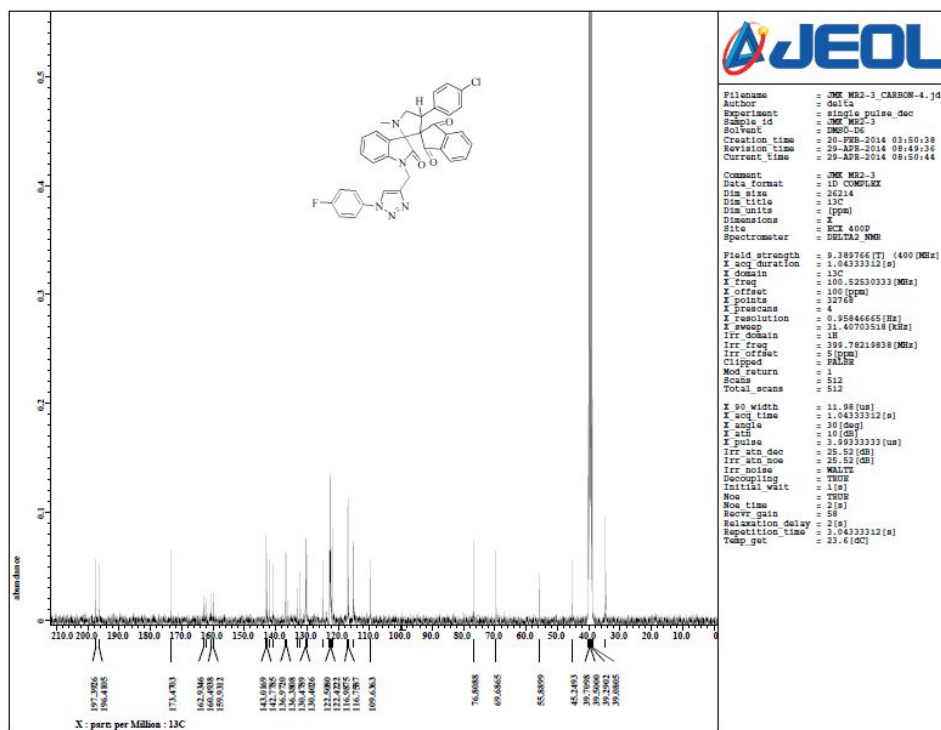

**Figure 3.** Mass spectrum of compound **6a**.

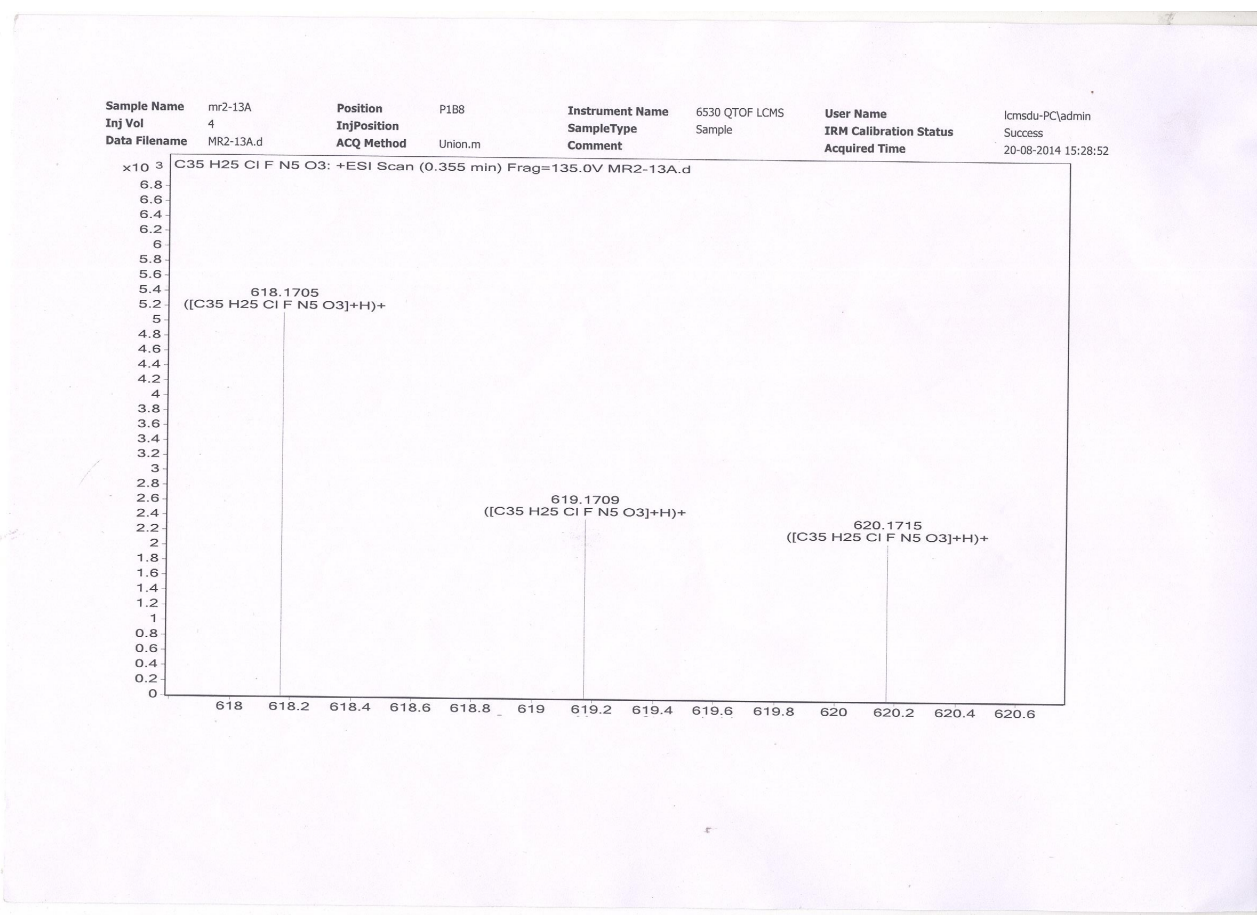

Figure 4. <sup>1</sup>H NMR spectrum of compound **6b** (400 MHz, CDCl<sub>3</sub>)

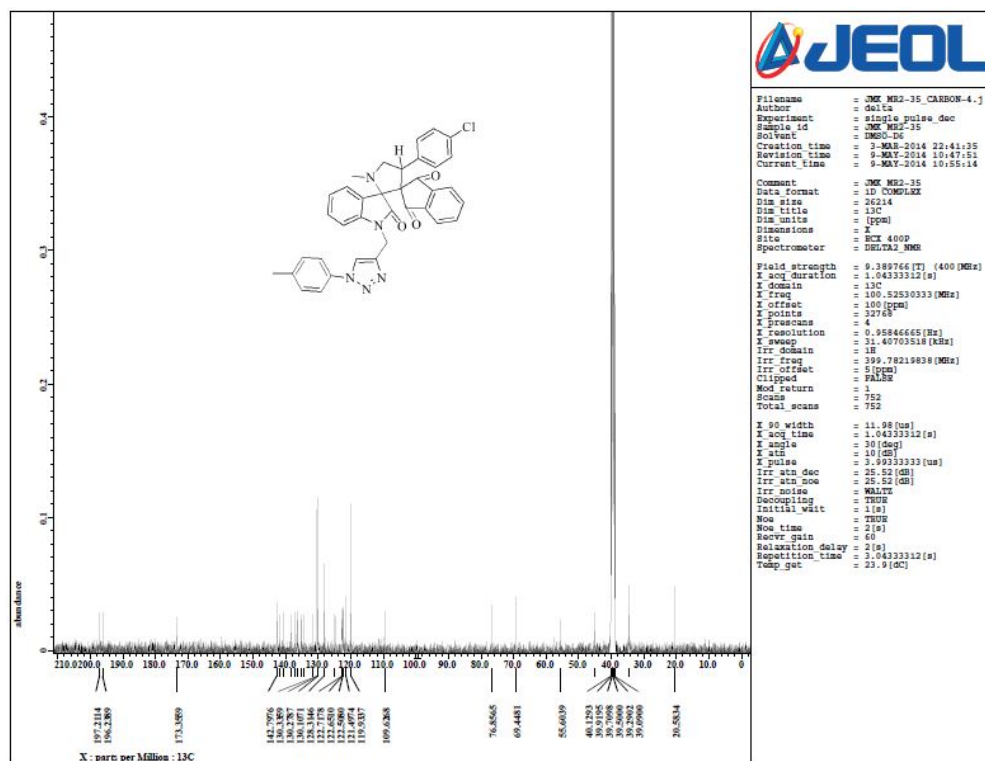

Figure 5. <sup>13</sup>C NMR spectrum of compound **6b** (100 MHz, CDCl<sub>3</sub>).

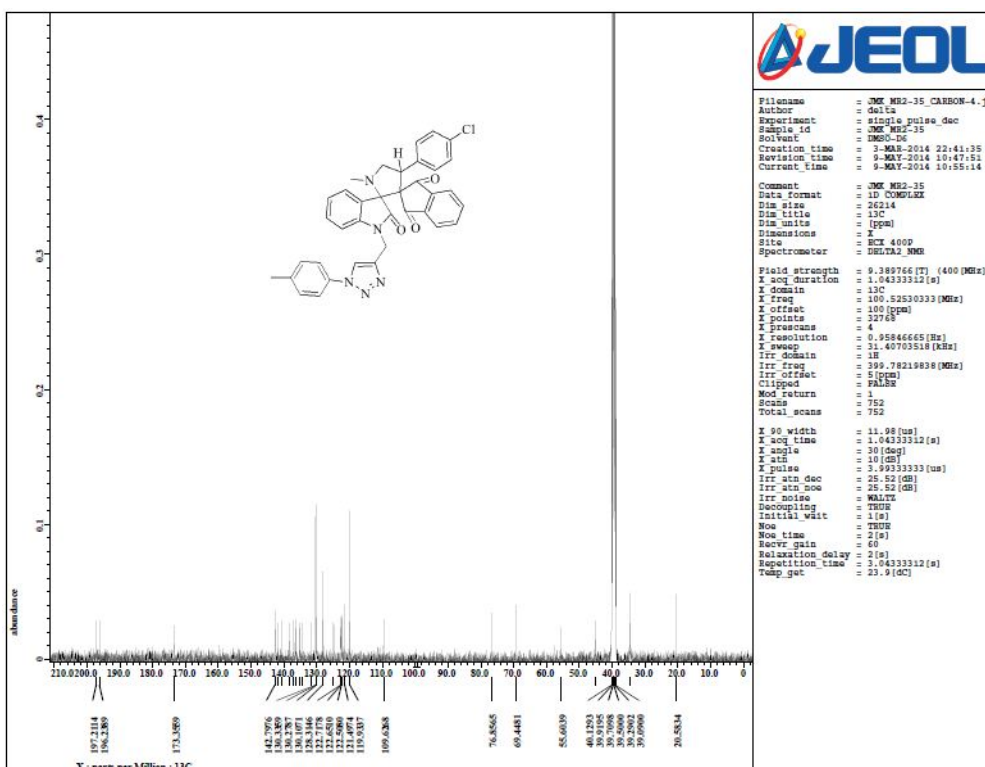



Figure 6. Mass spectrum of compound 6b.

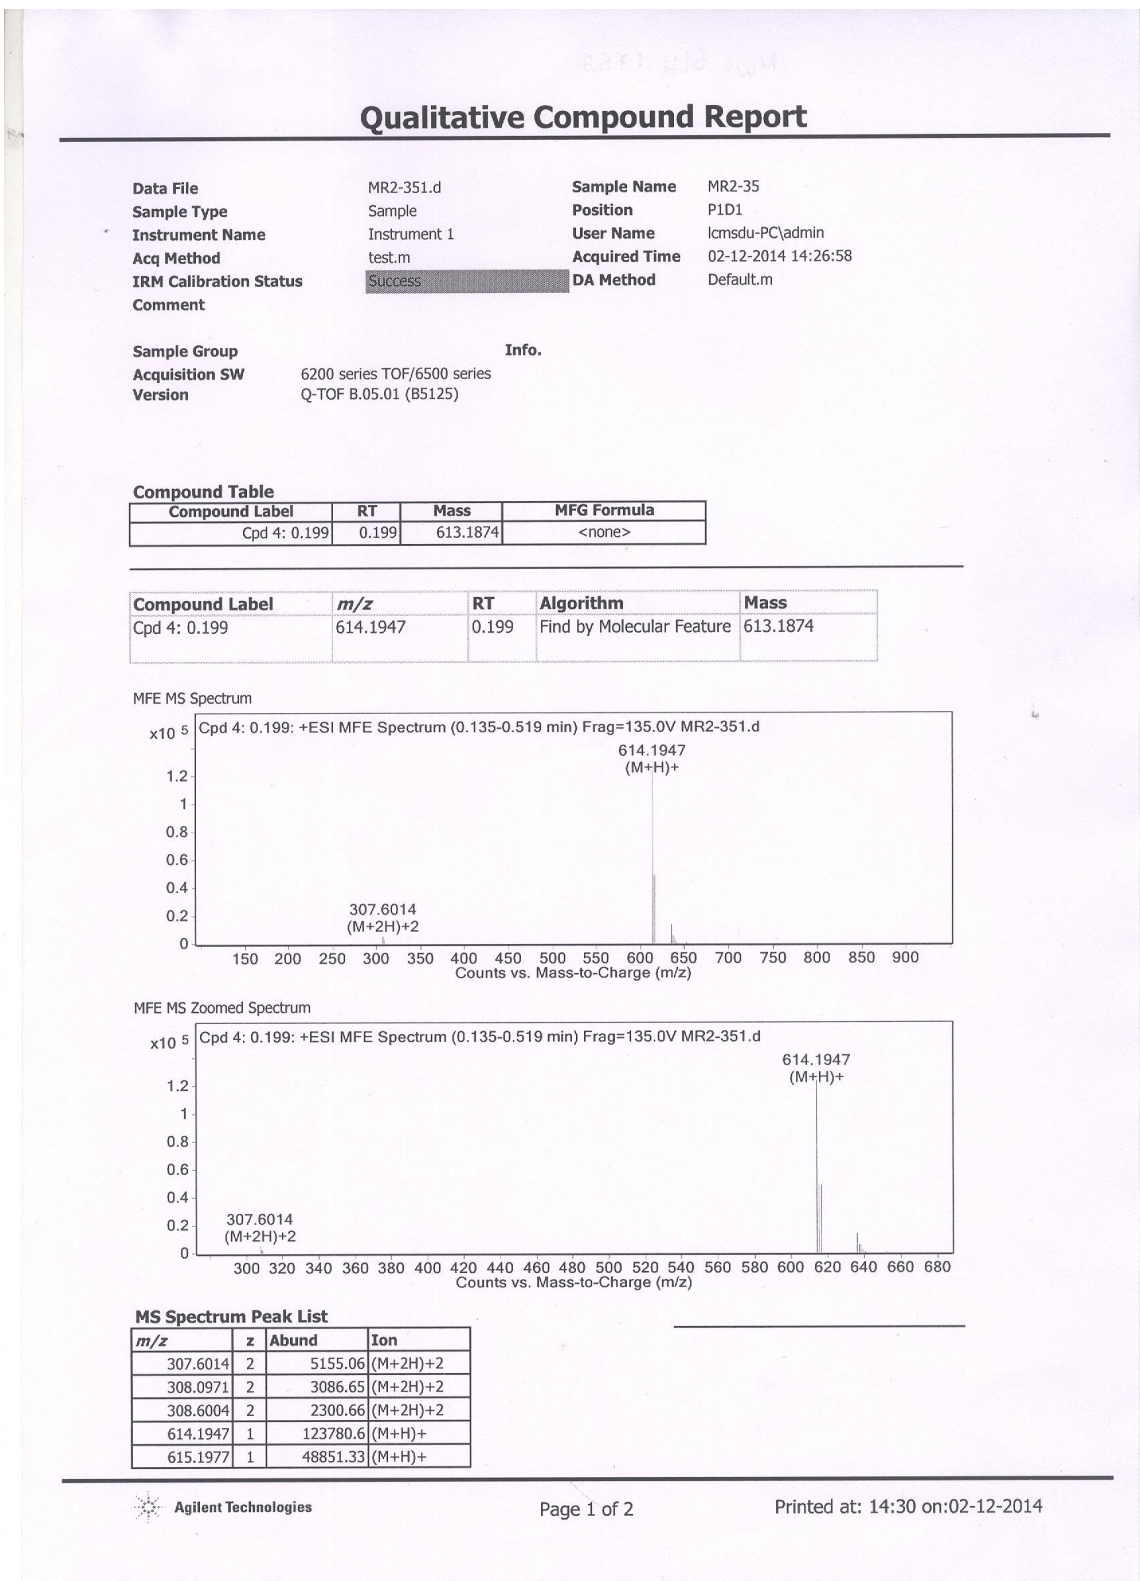

Figure 7.  $^1\text{H}$  NMR spectrum of compound **6c** (400 MHz,  $\text{CDCl}_3$ )

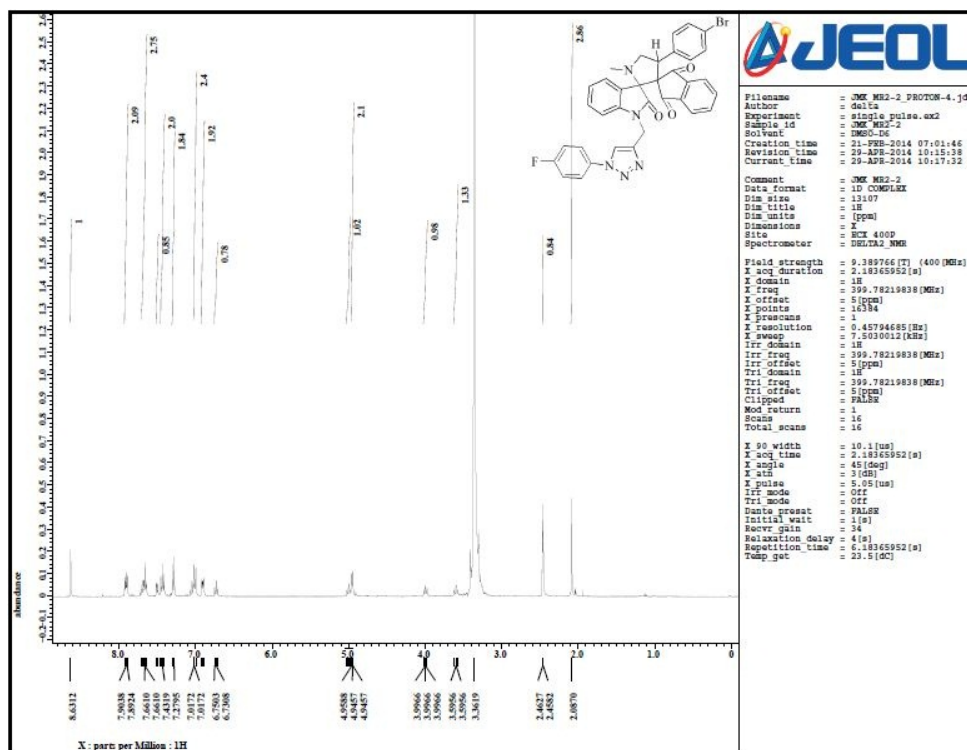

Figure 8.  $^{13}\text{C}$  NMR spectrum of compound **6c** (100 MHz,  $\text{CDCl}_3$ ).

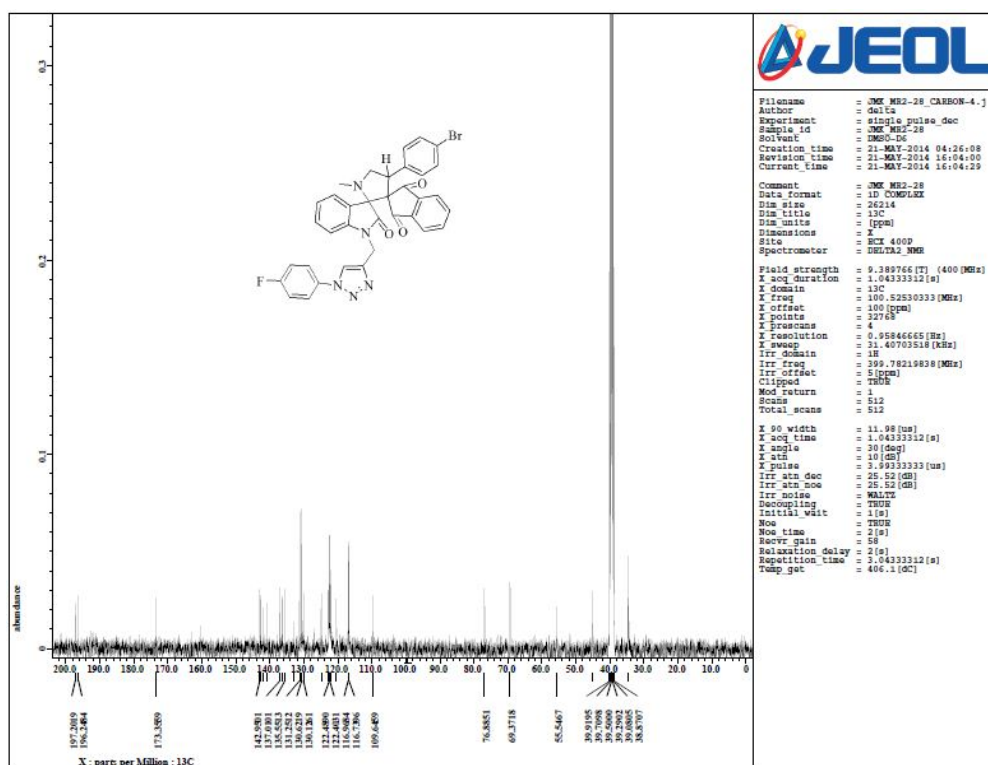



Figure 9. Mass spectrum of compound 6c.

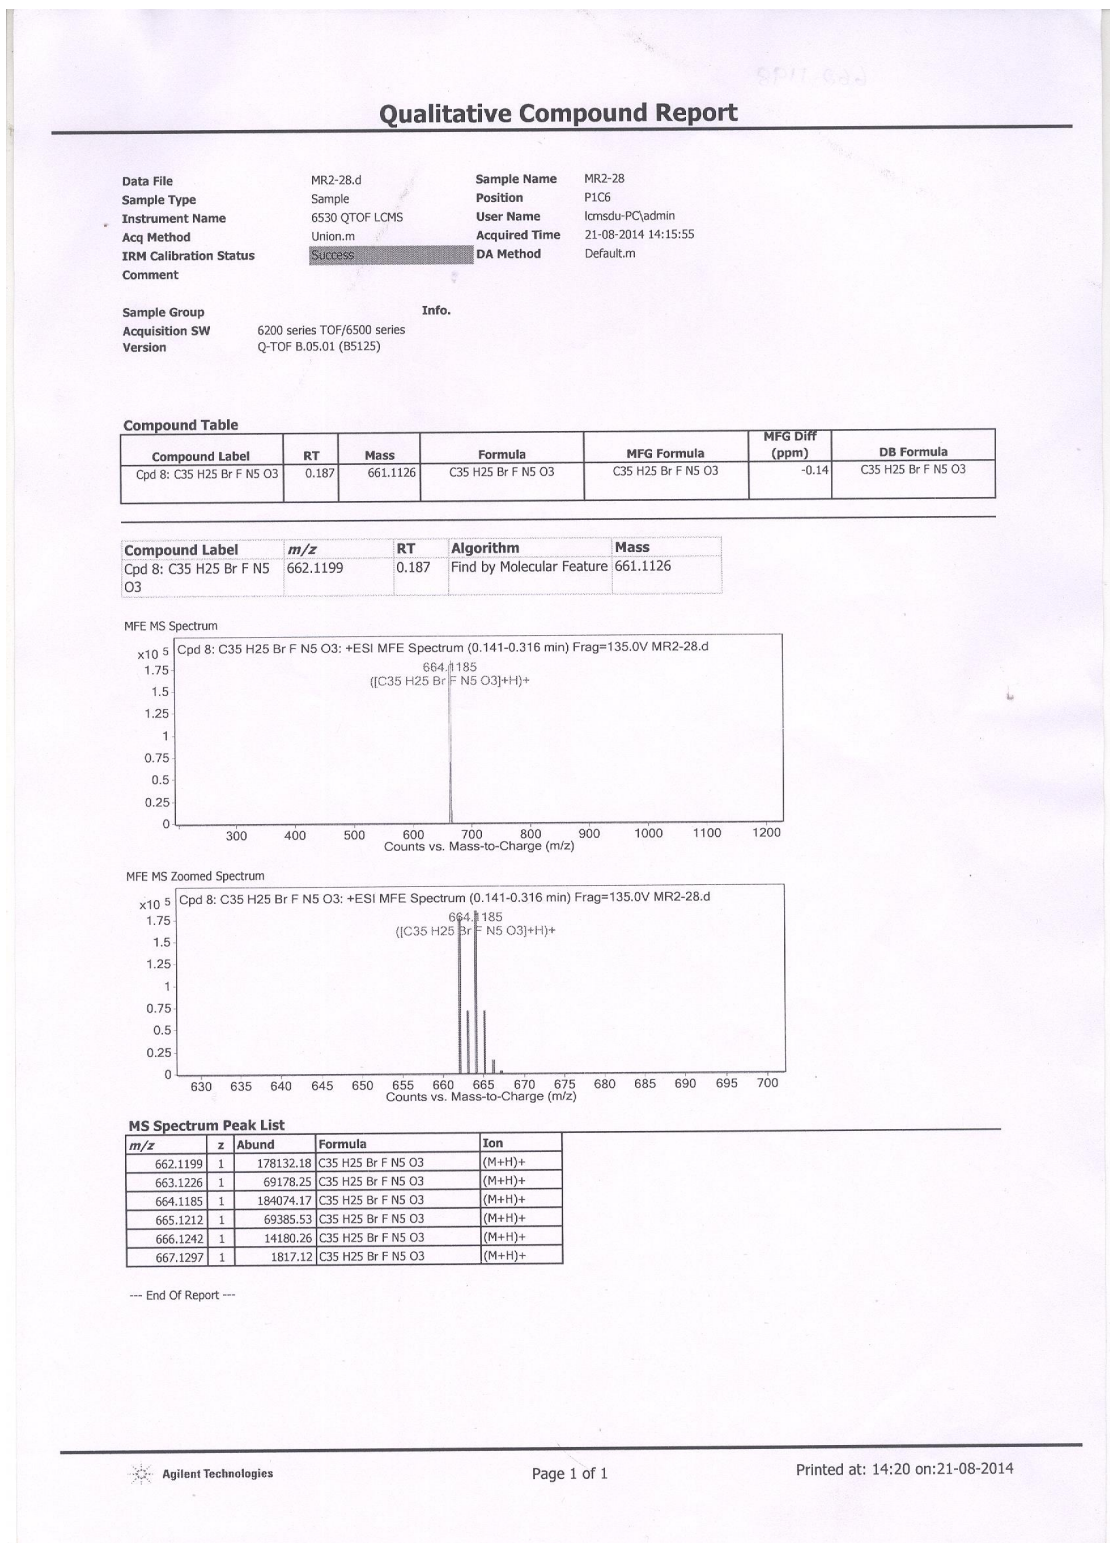

Figure 10.  $^1\text{H}$  NMR spectrum of compound **6d** (400 MHz,  $\text{CDCl}_3$ ).

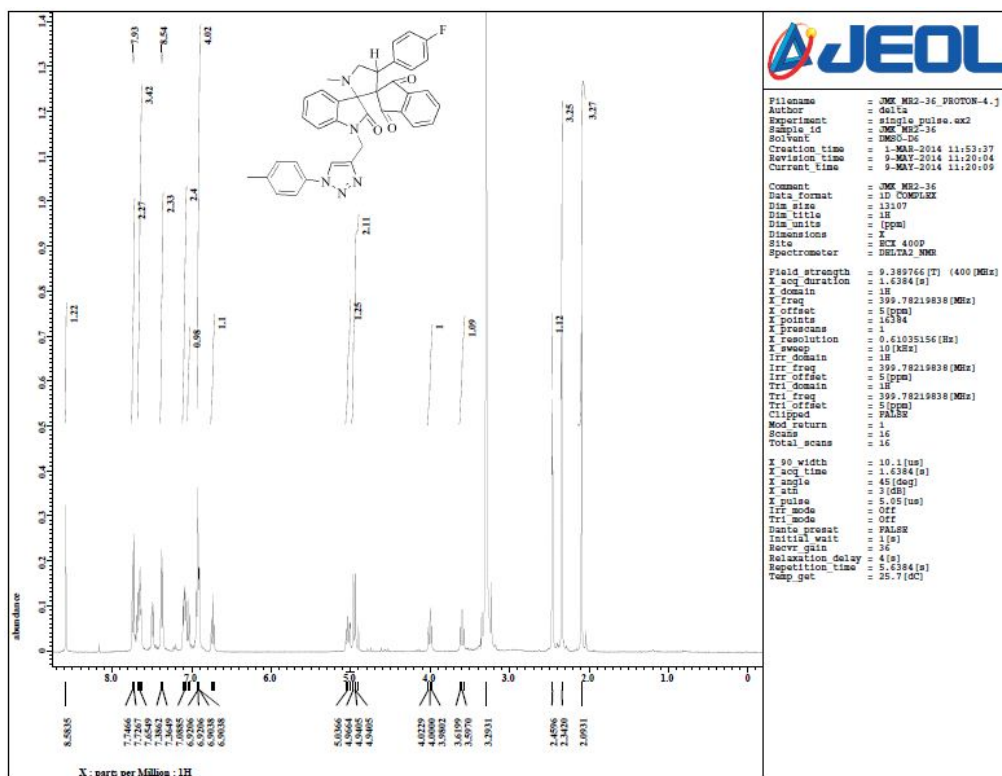

Figure 11.  $^{13}\text{C}$  NMR spectrum of compound **6d** (100 MHz,  $\text{CDCl}_3$ ).

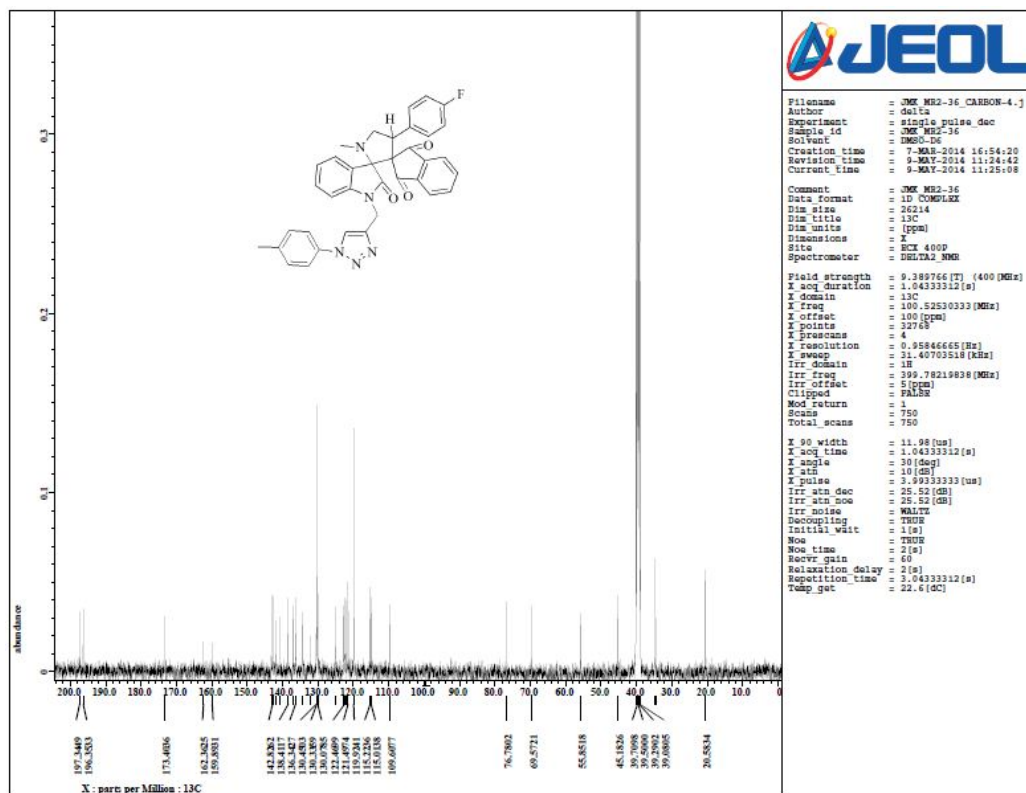



Figure 12. Mass spectrum of compound 6d.

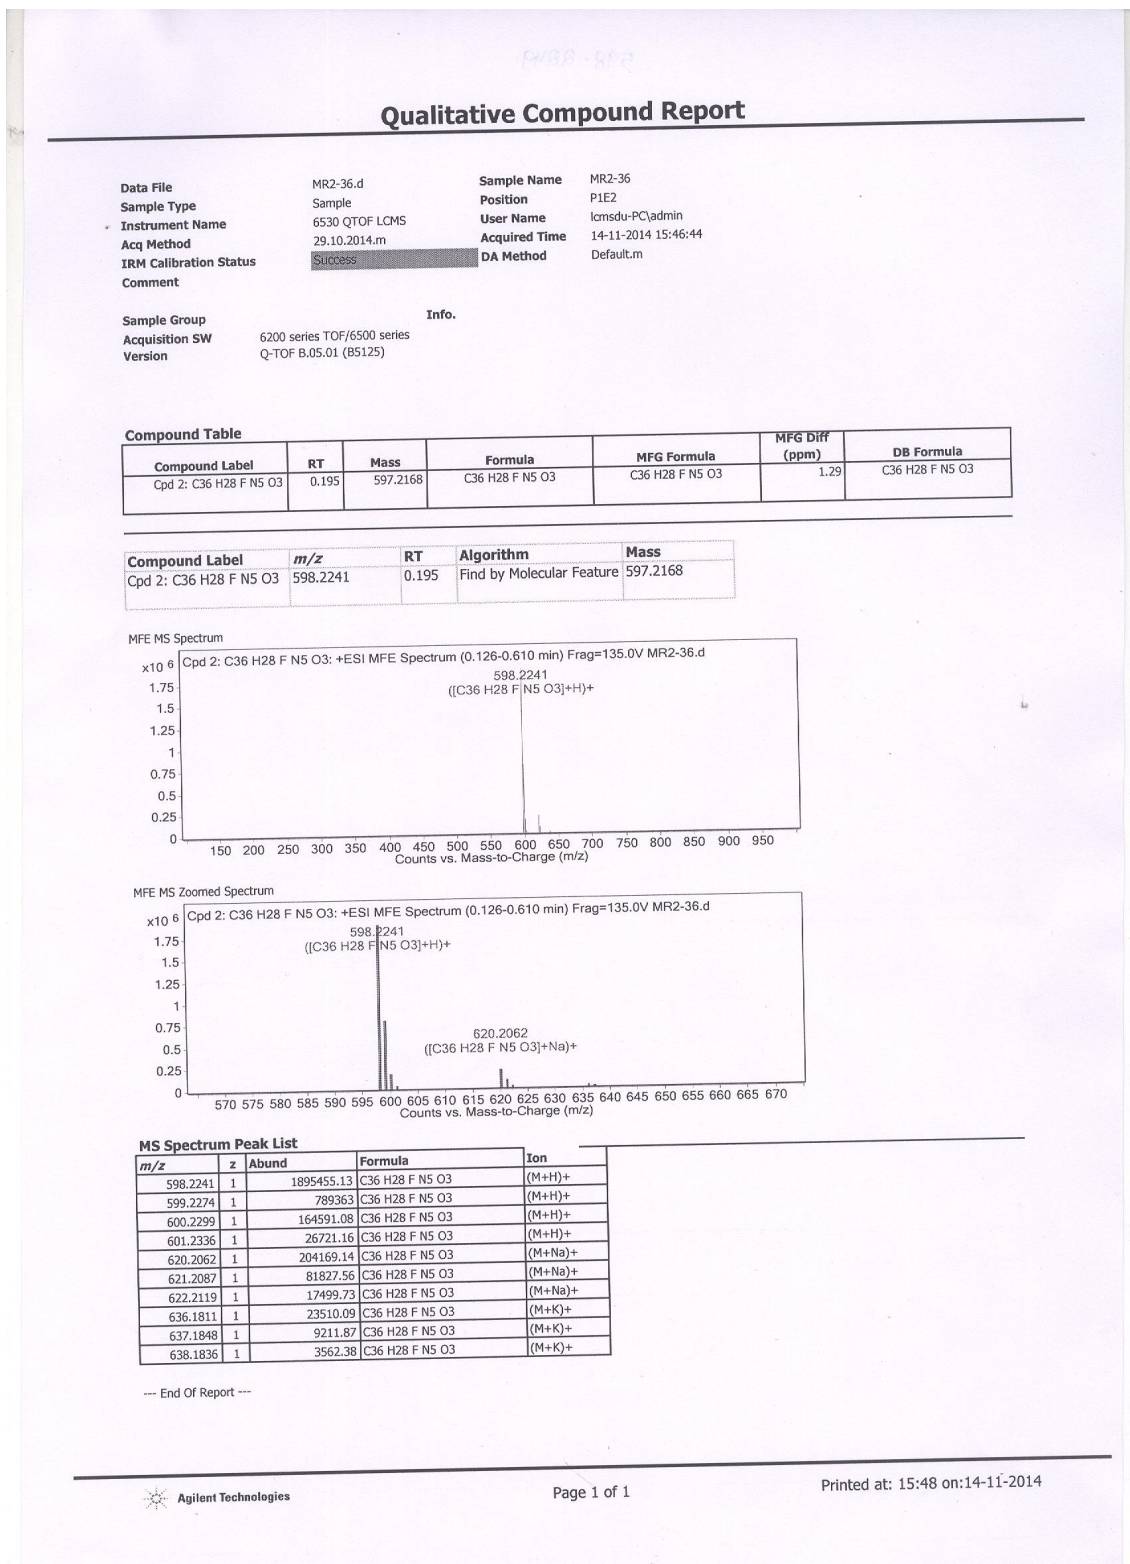

Figure 13.  $^1\text{H}$  NMR spectrum of compound 6e (400 MHz,  $\text{CDCl}_3$ ).

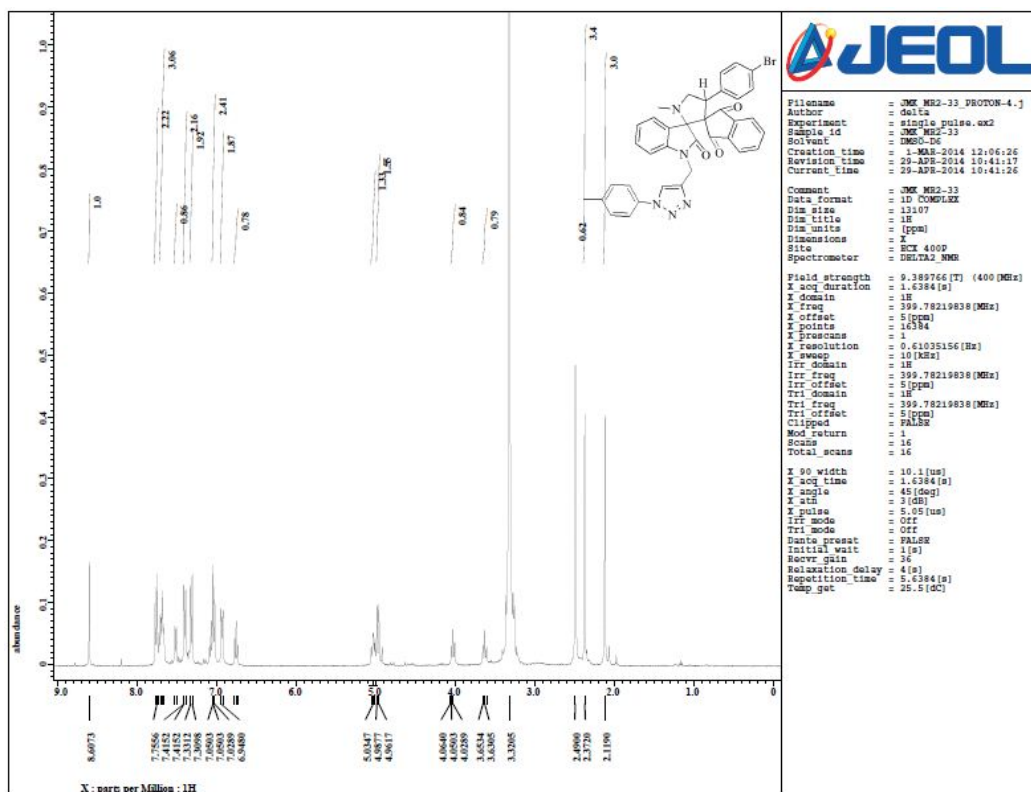

Figure 14.  $^{13}\text{C}$  NMR spectrum of compound 6e (100 MHz,  $\text{CDCl}_3$ ).

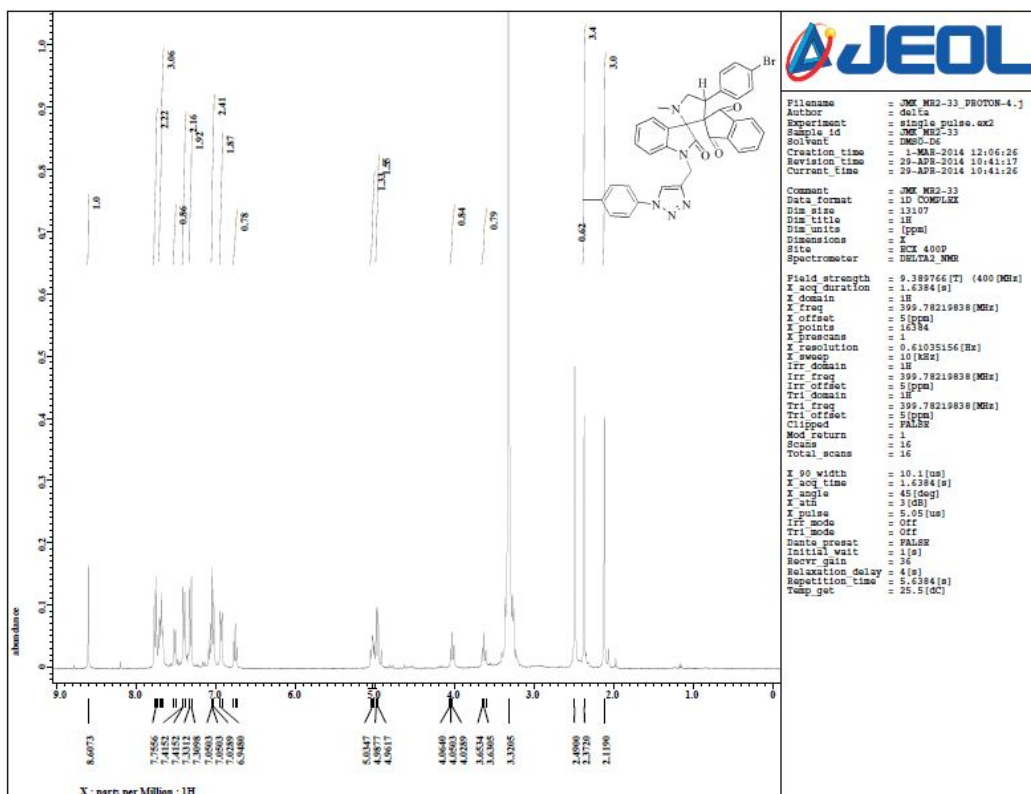



Figure 15. Mass spectrum of compound 6e.

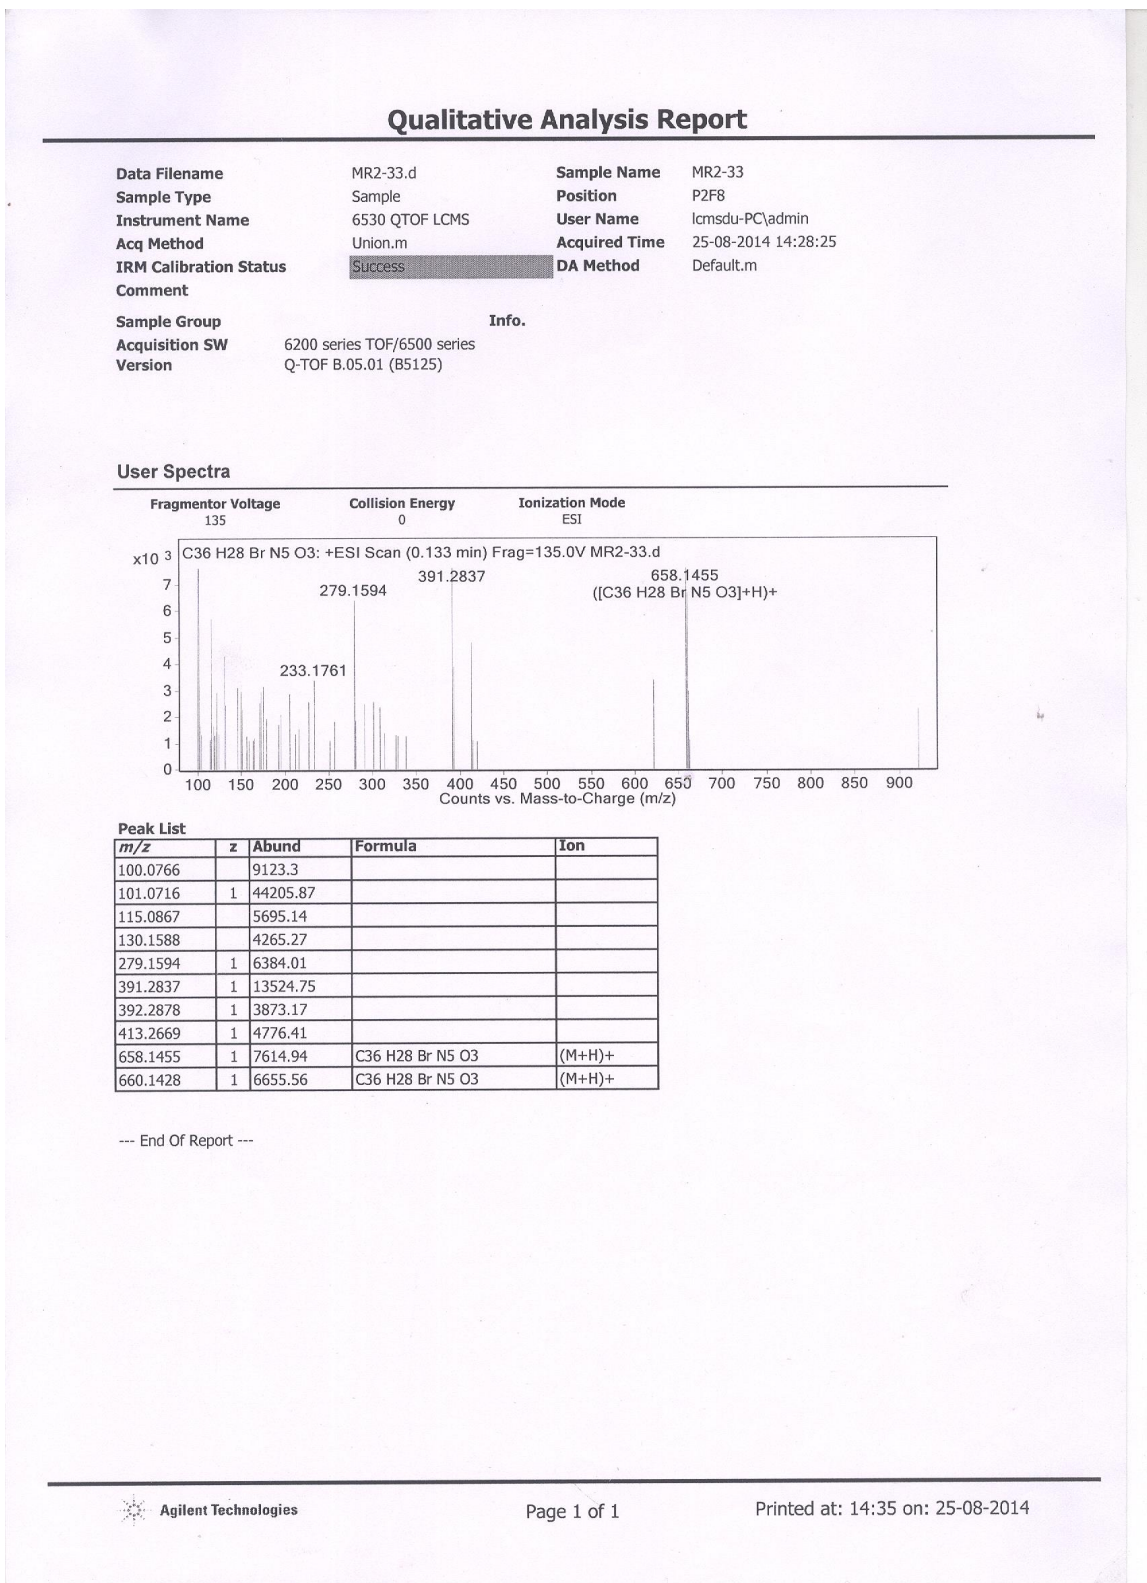

Figure 16.  $^1\text{H}$  NMR spectrum of compound **6f** (400 MHz,  $\text{CDCl}_3$ ).

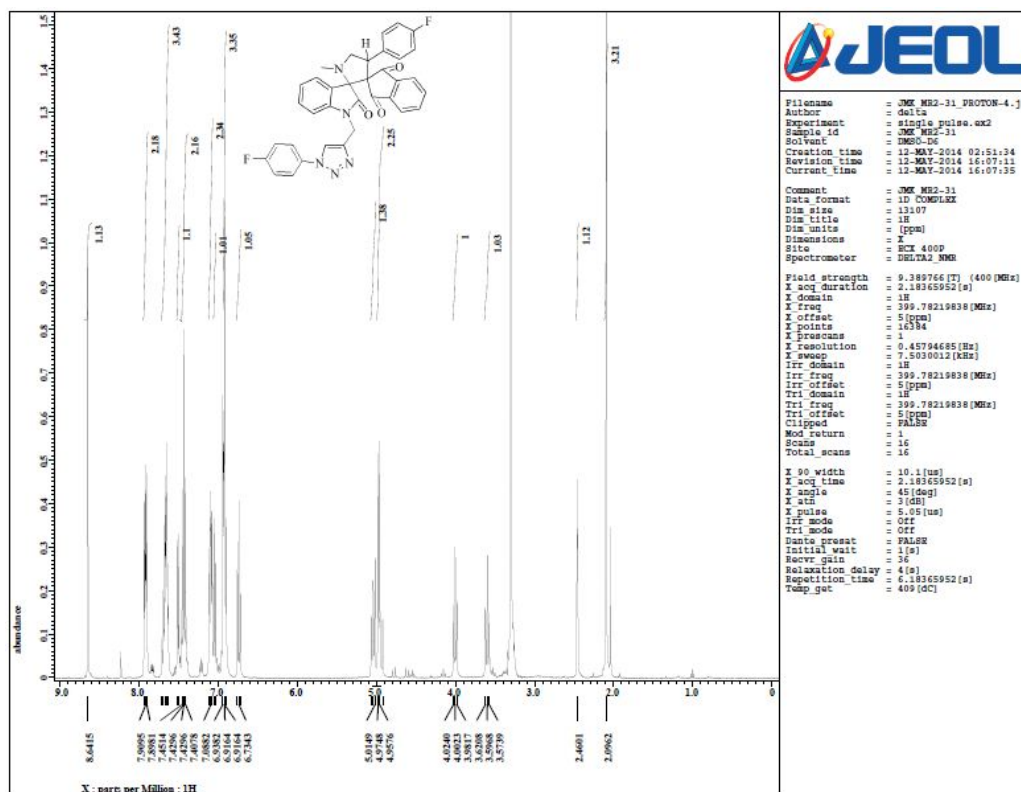

Figure 17.  $^{13}\text{C}$  NMR spectrum of compound **6f** (100 MHz,  $\text{CDCl}_3$ ).

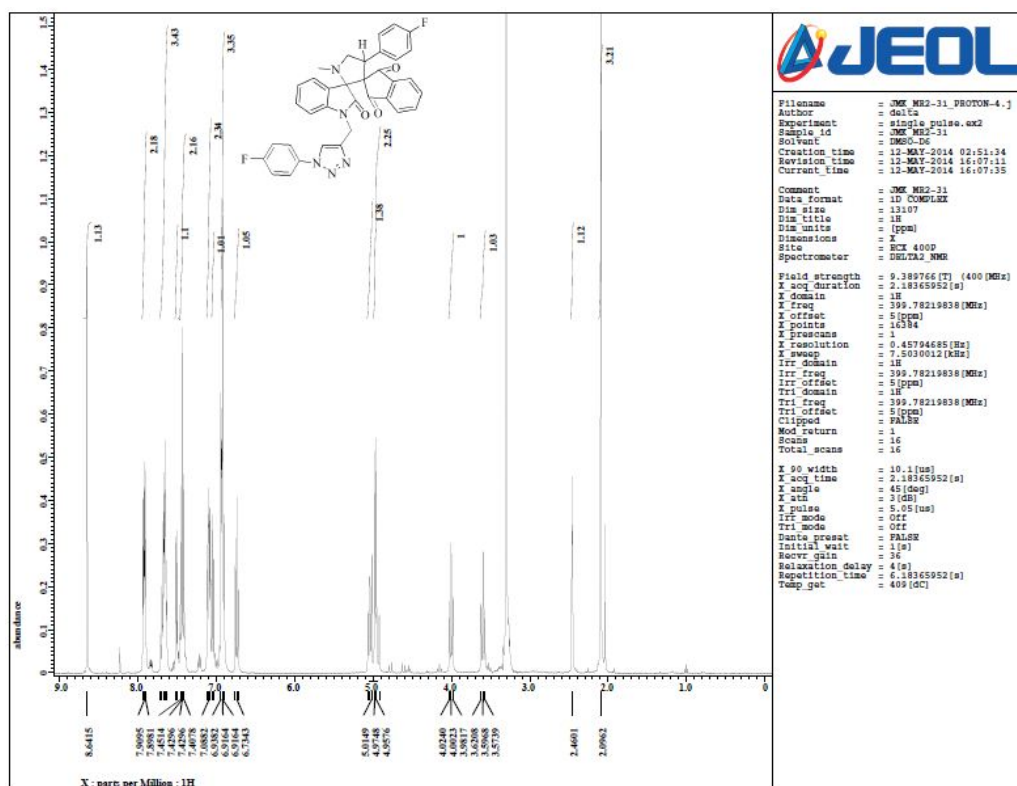



Figure 18. Mass spectrum of compound 6f.

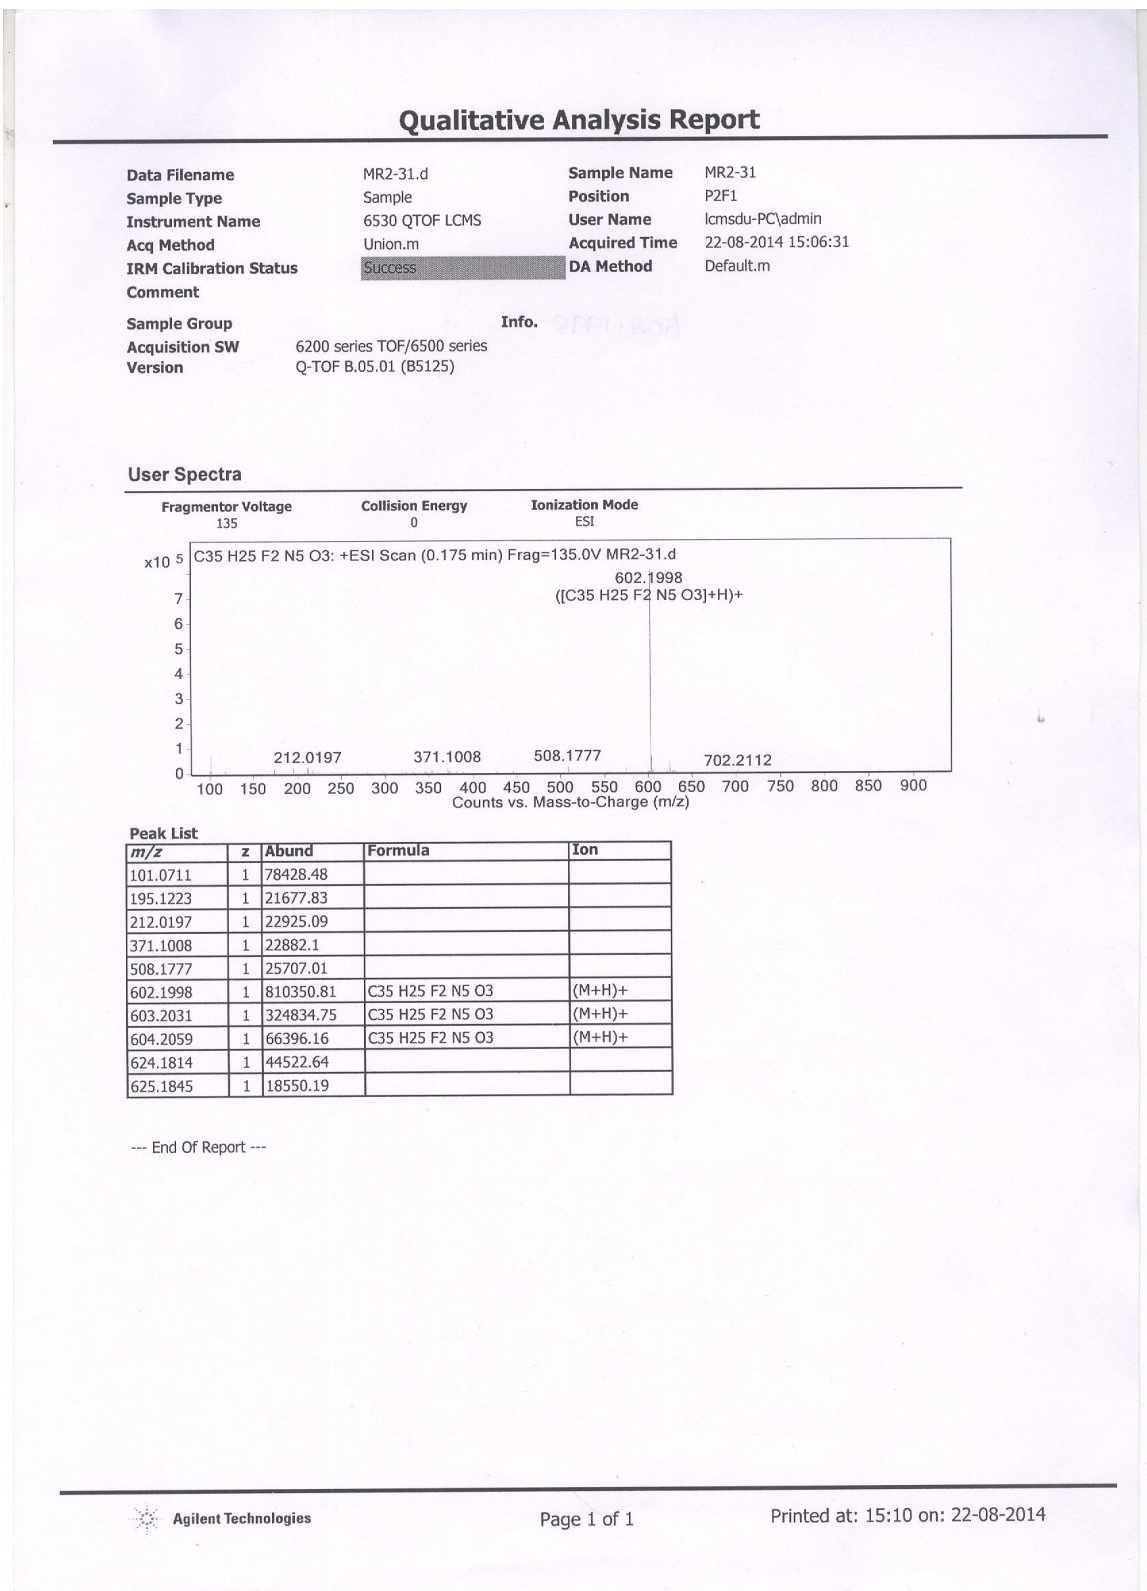

Figure 19.  $^1\text{H}$  NMR spectrum of compound **6g** (400 MHz,  $\text{CDCl}_3$ ).

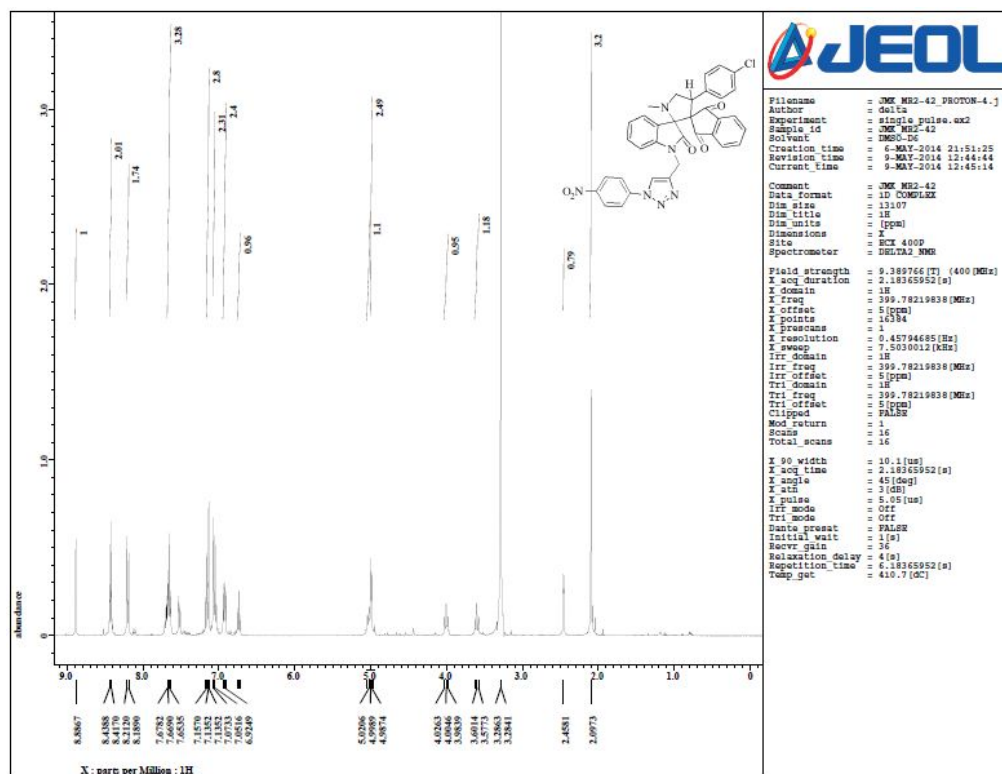

Figure 20.  $^{13}\text{C}$  NMR spectrum of compound **6g** (100 MHz,  $\text{CDCl}_3$ ).

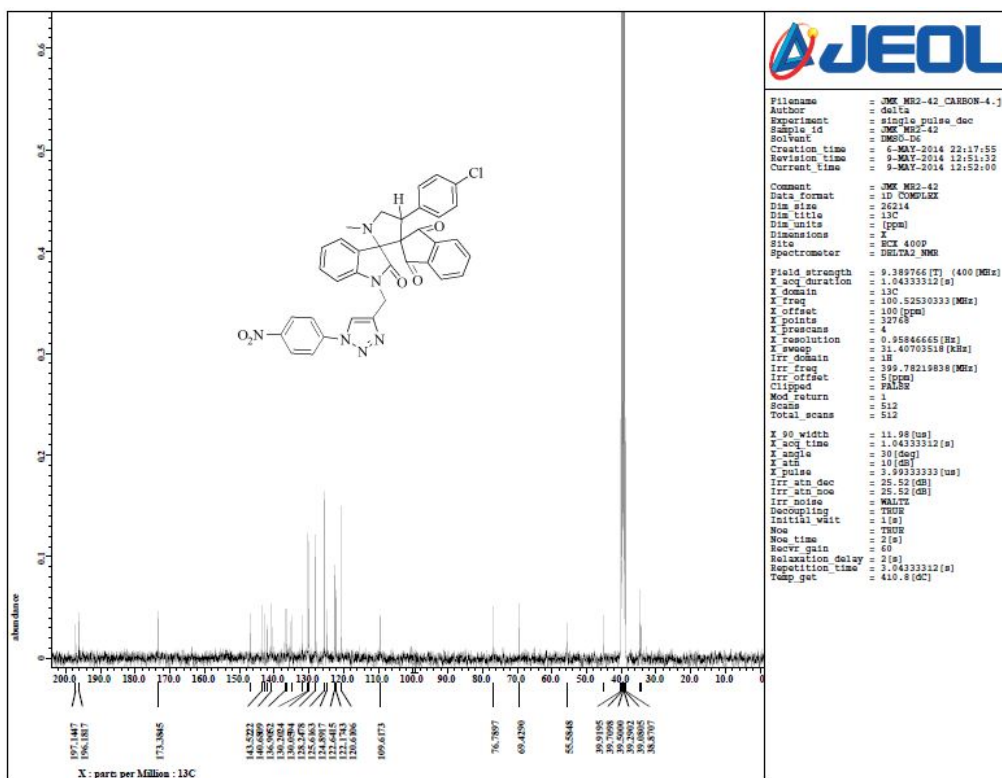



Figure 21. Mass spectrum of compound 6g.

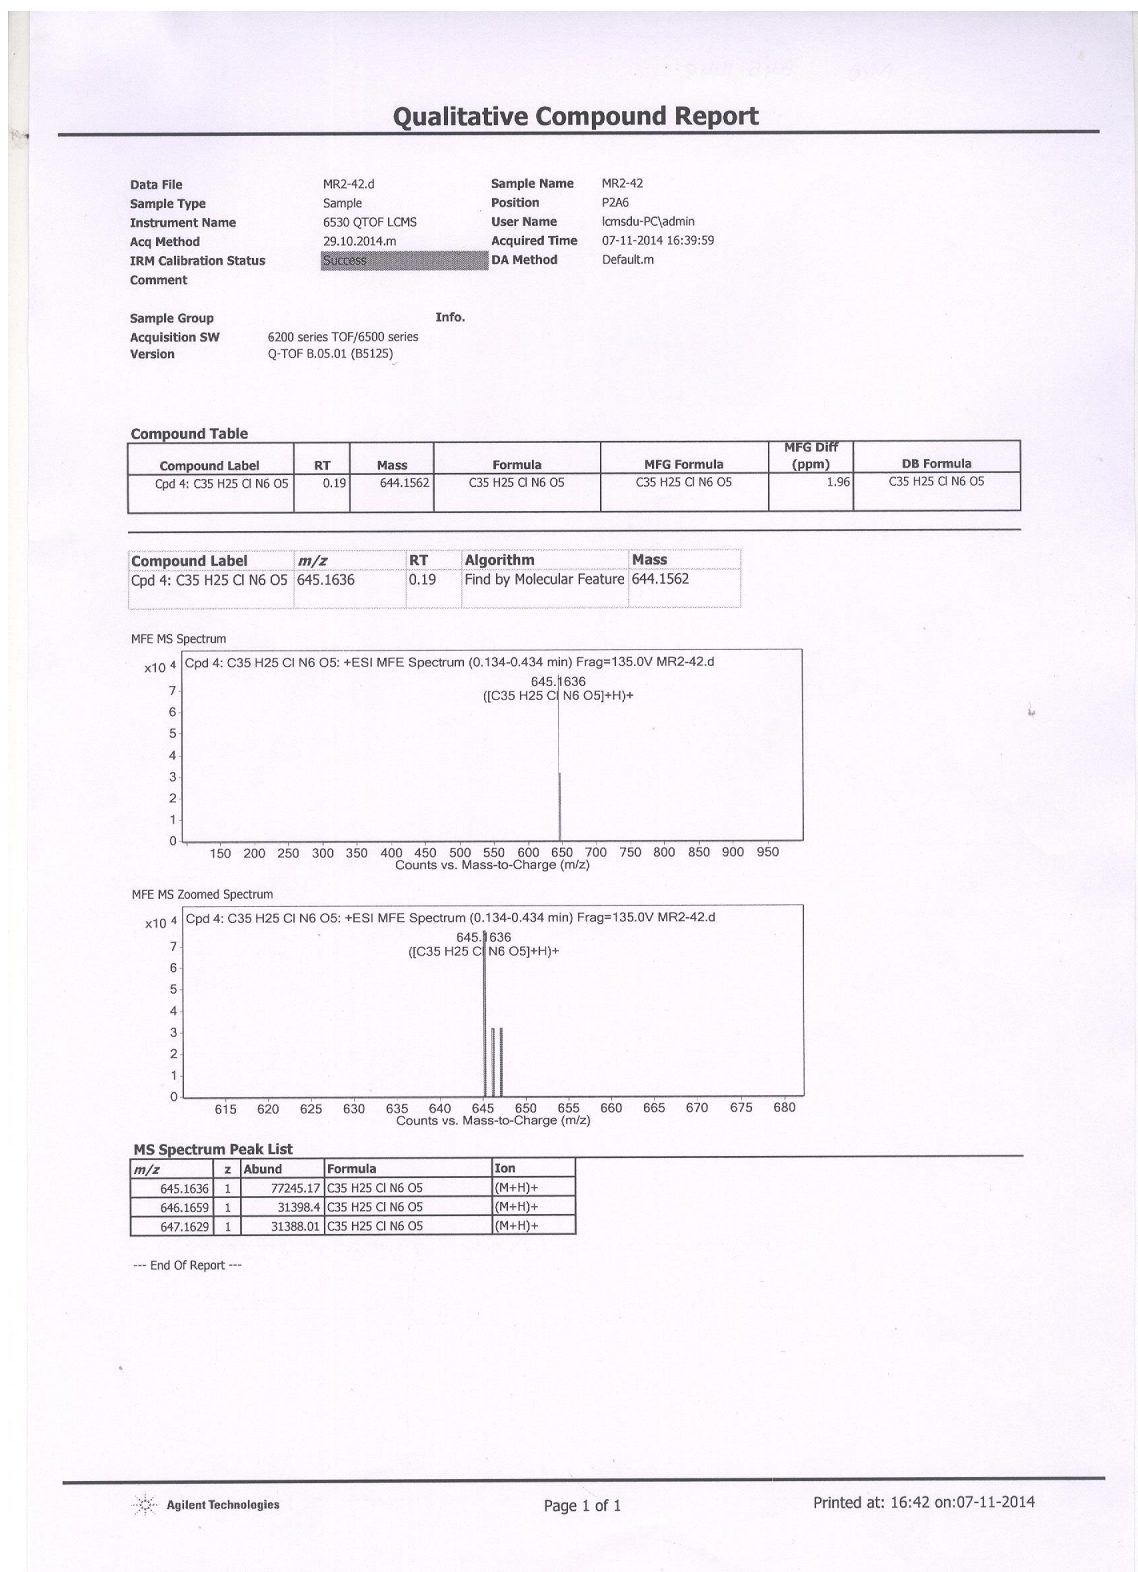

Figure 22.  $^1\text{H}$  NMR spectrum of compound **6h** (400 MHz,  $\text{CDCl}_3$ ).

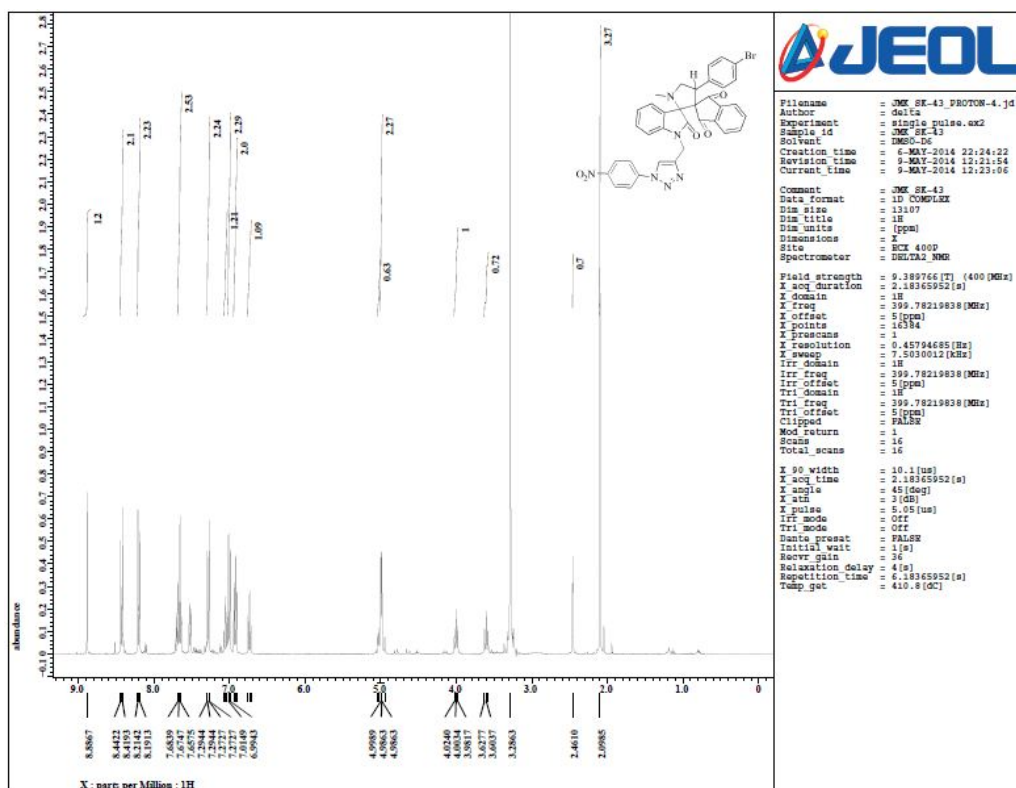

Figure 23.  $^{13}\text{C}$  NMR spectrum of compound **6h** (100 MHz,  $\text{CDCl}_3$ ).

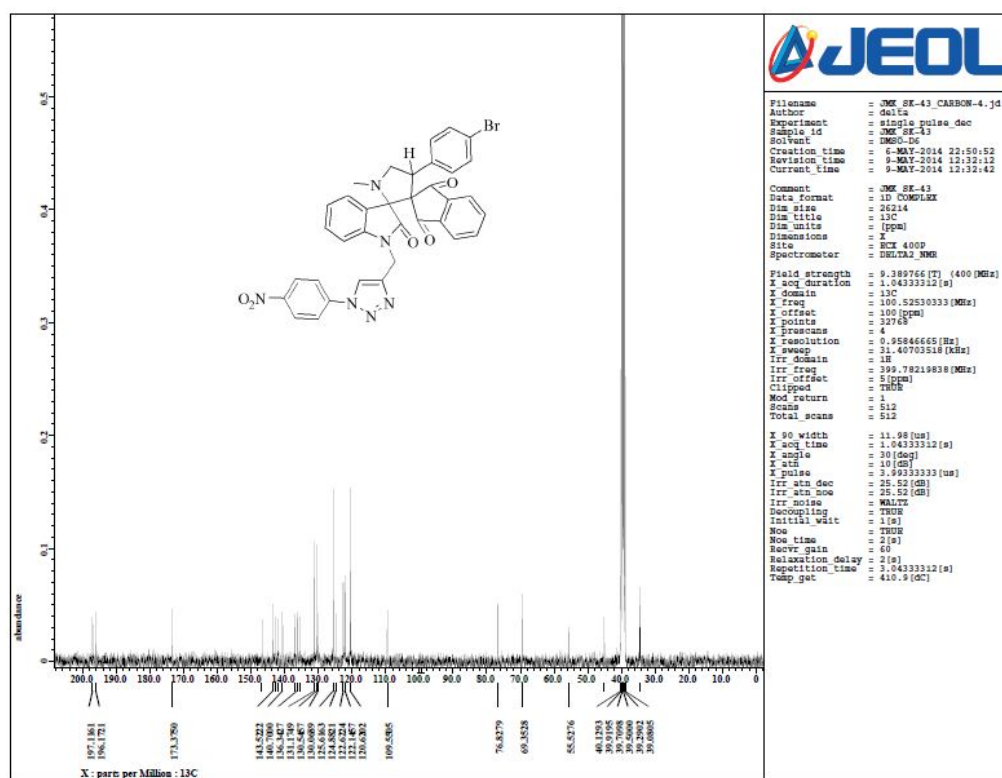



Figure 24. Mass spectrum of compound 6h.

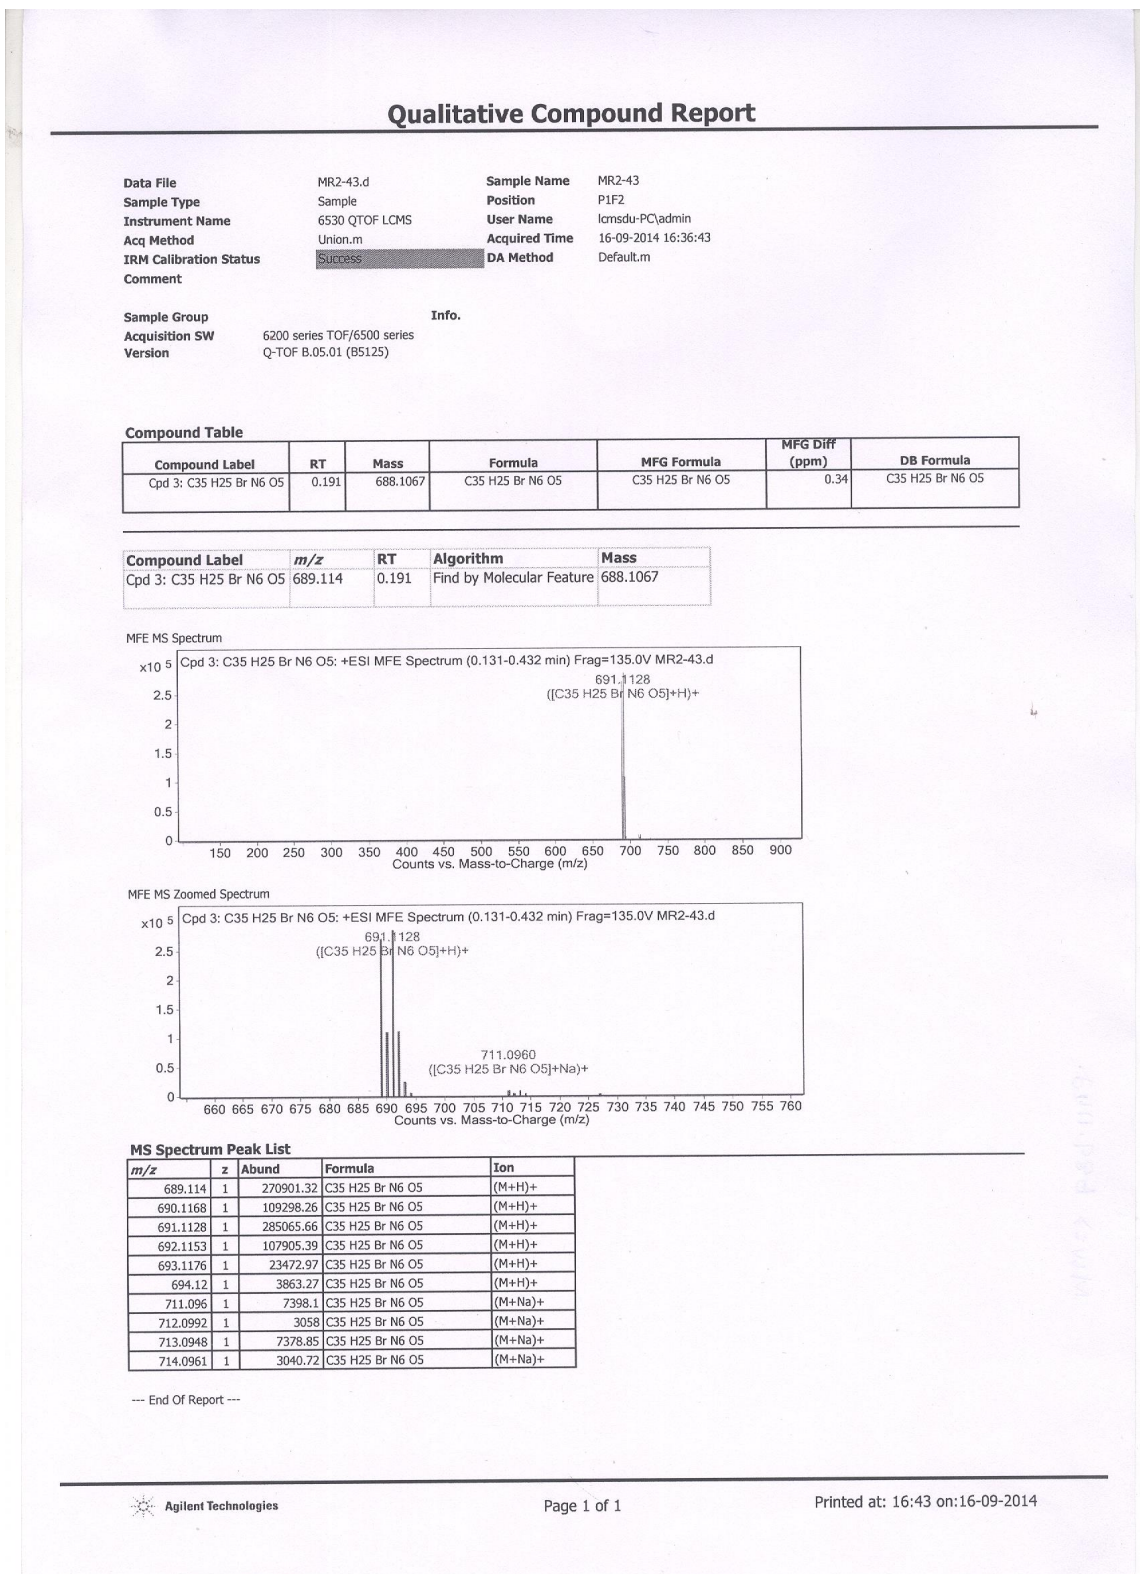

Figure 25.  $^1\text{H}$  NMR spectrum of compound **6i** (400 MHz,  $\text{CDCl}_3$ ).

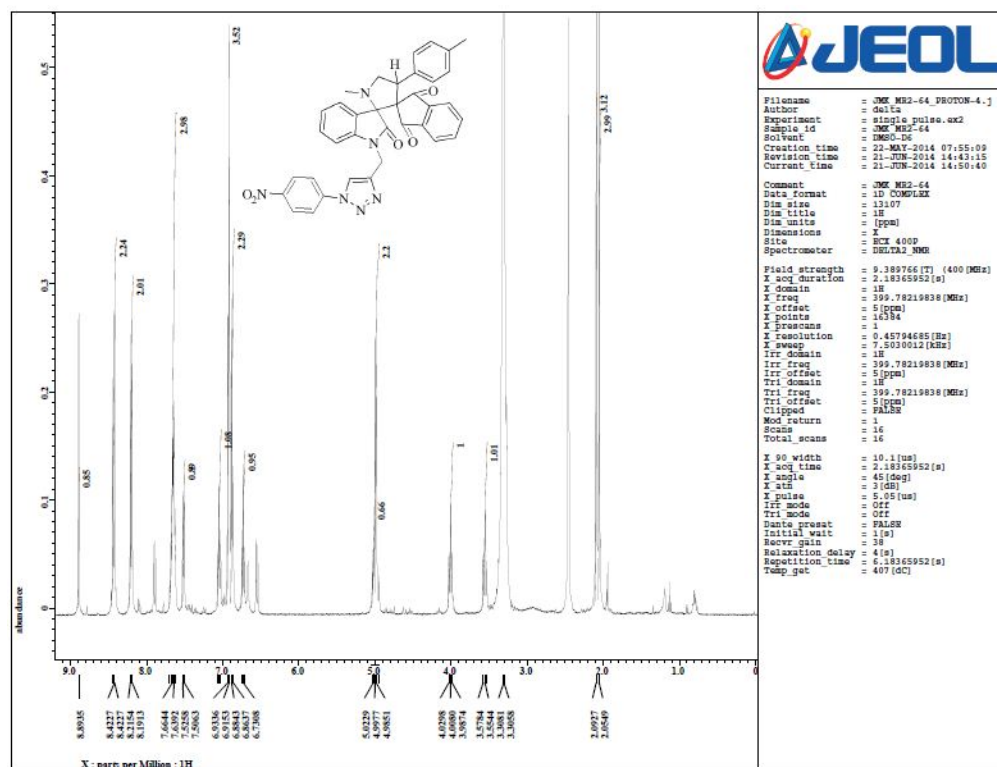

Figure 26.  $^{13}\text{C}$  NMR spectrum of compound **6i** (100 MHz,  $\text{CDCl}_3$ ).

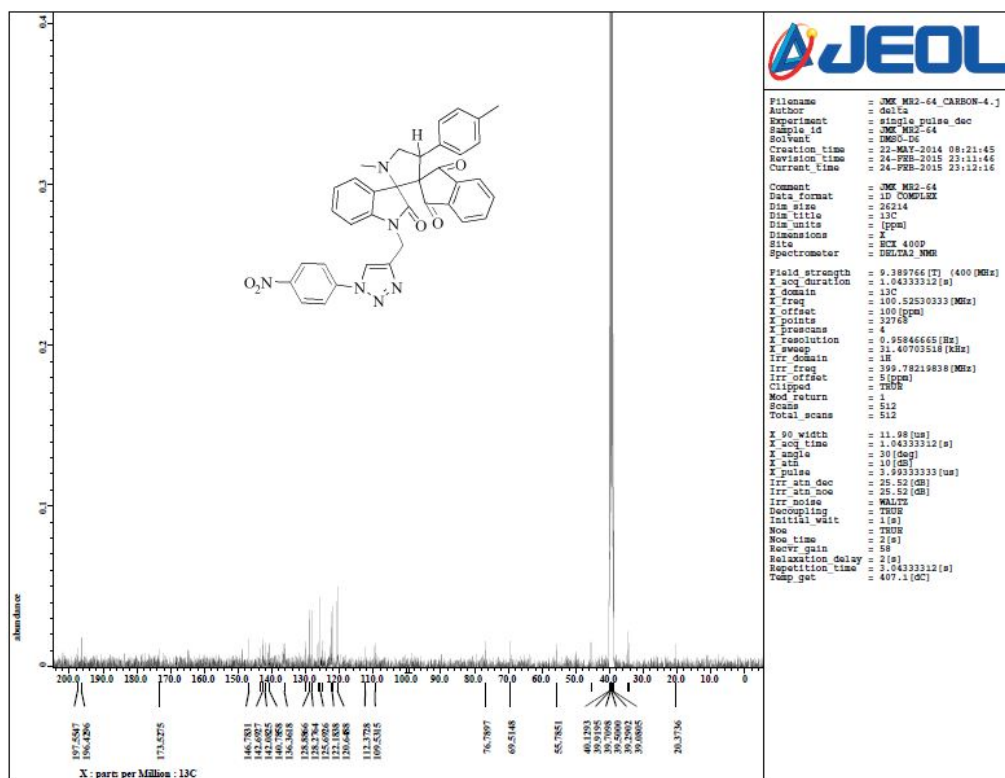



Figure 27. Mass spectrum of compound 6i.

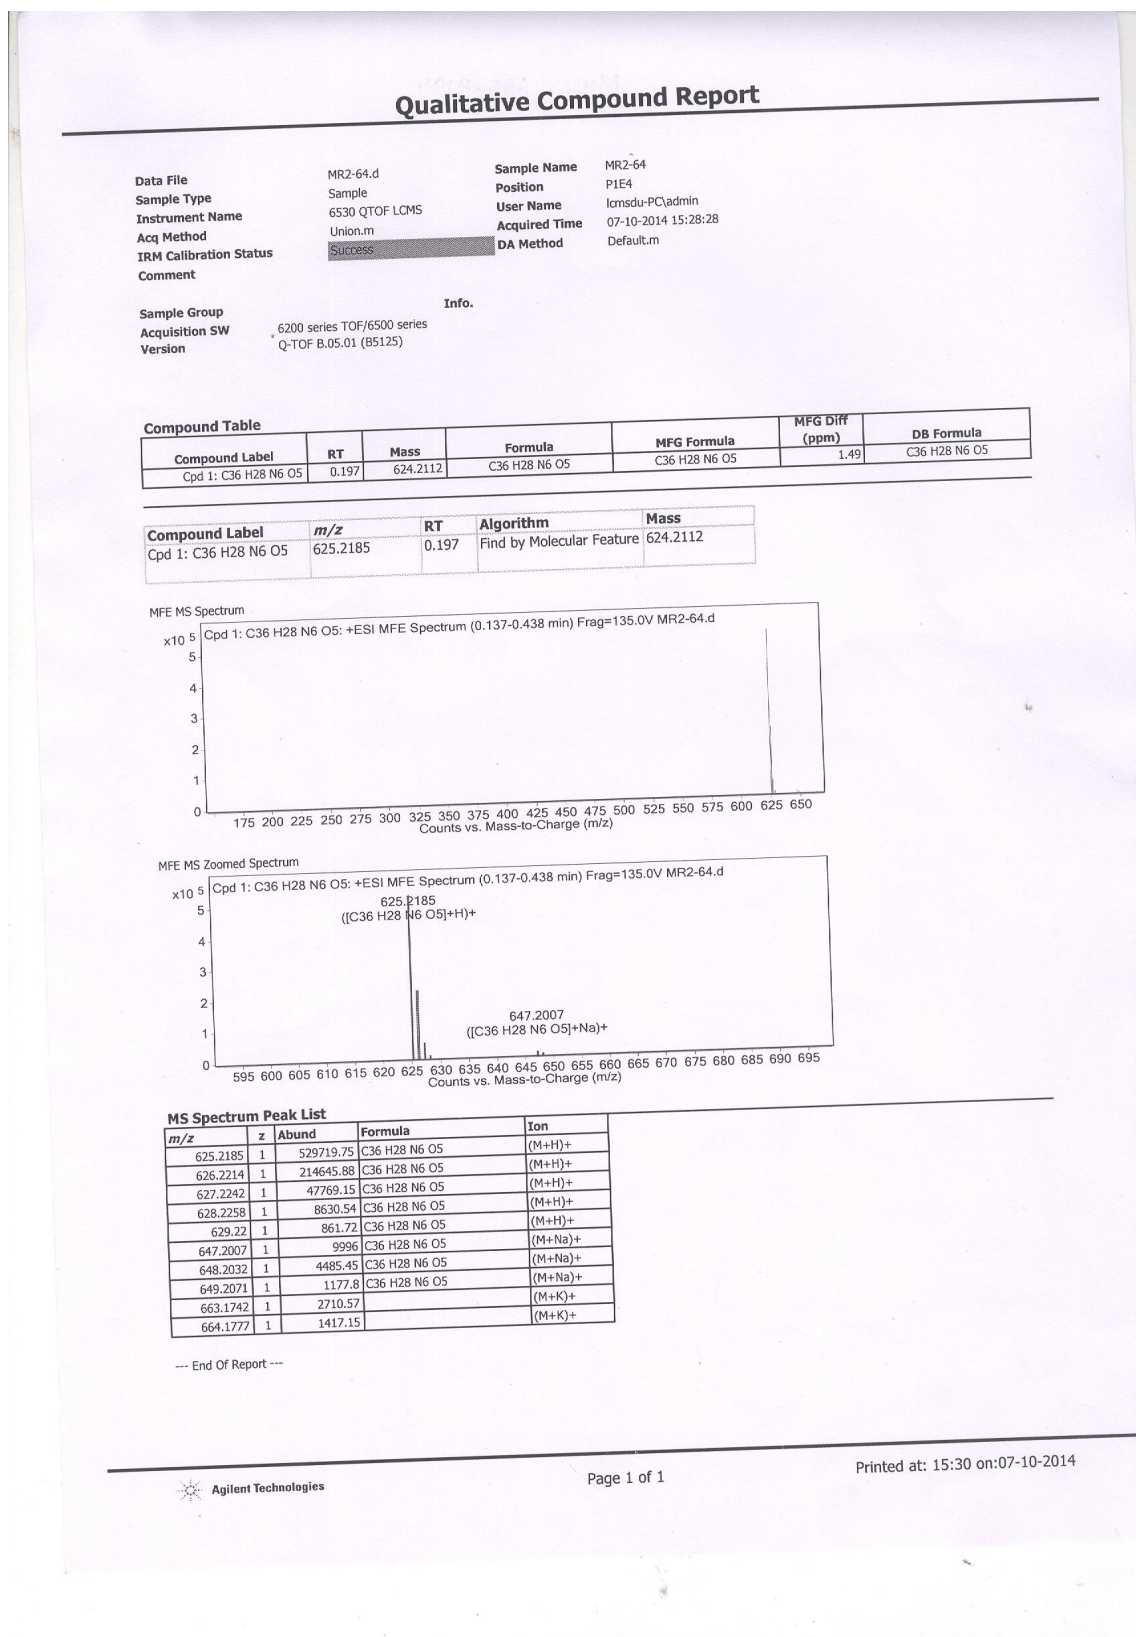

Figure 28.  $^1\text{H}$  NMR spectrum of compound **6j** (400 MHz,  $\text{CDCl}_3$ ).

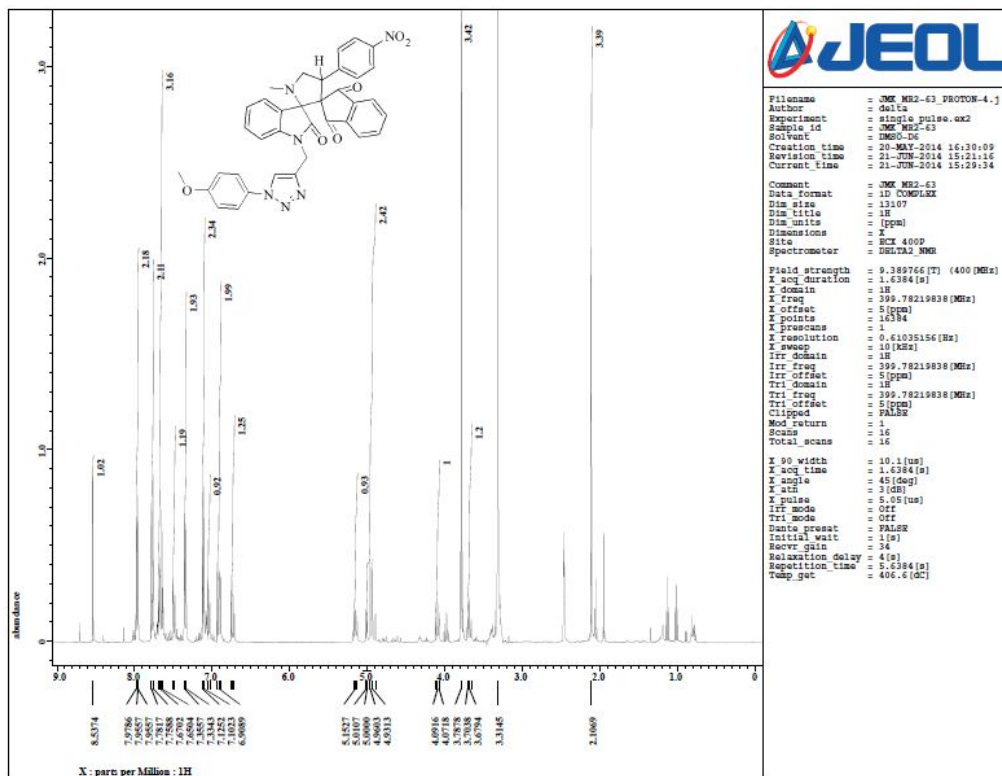

Figure 29.  $^{13}\text{C}$  NMR spectrum of compound **6j** (100 MHz,  $\text{CDCl}_3$ ).

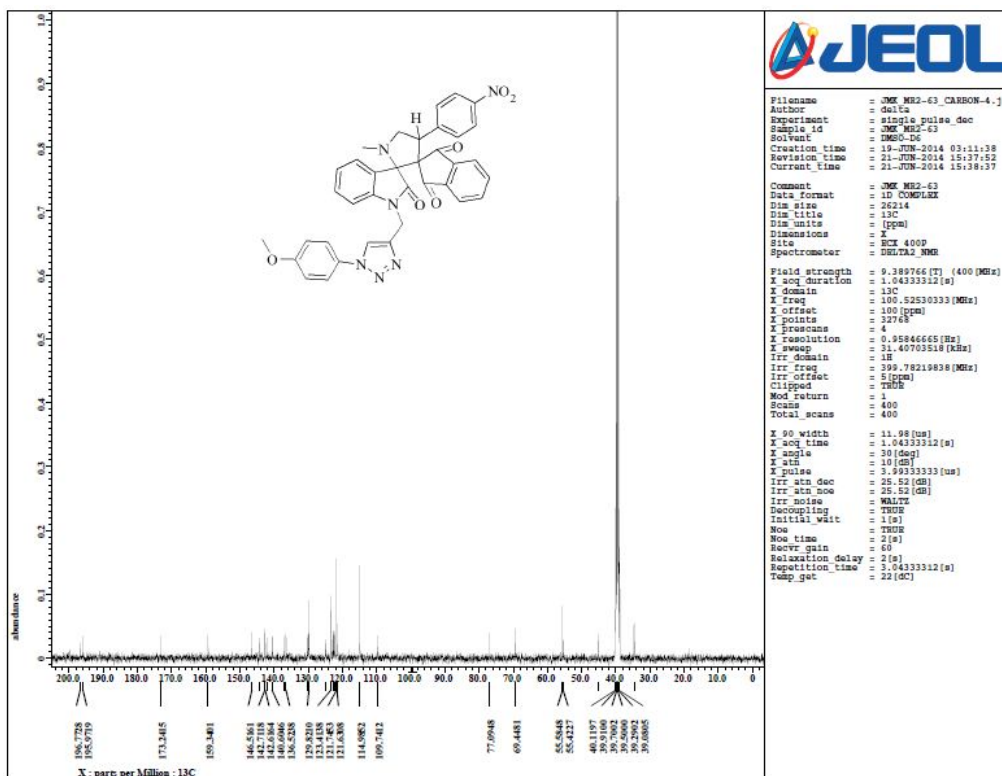



Figure 30. Mass spectrum of compound 6j.

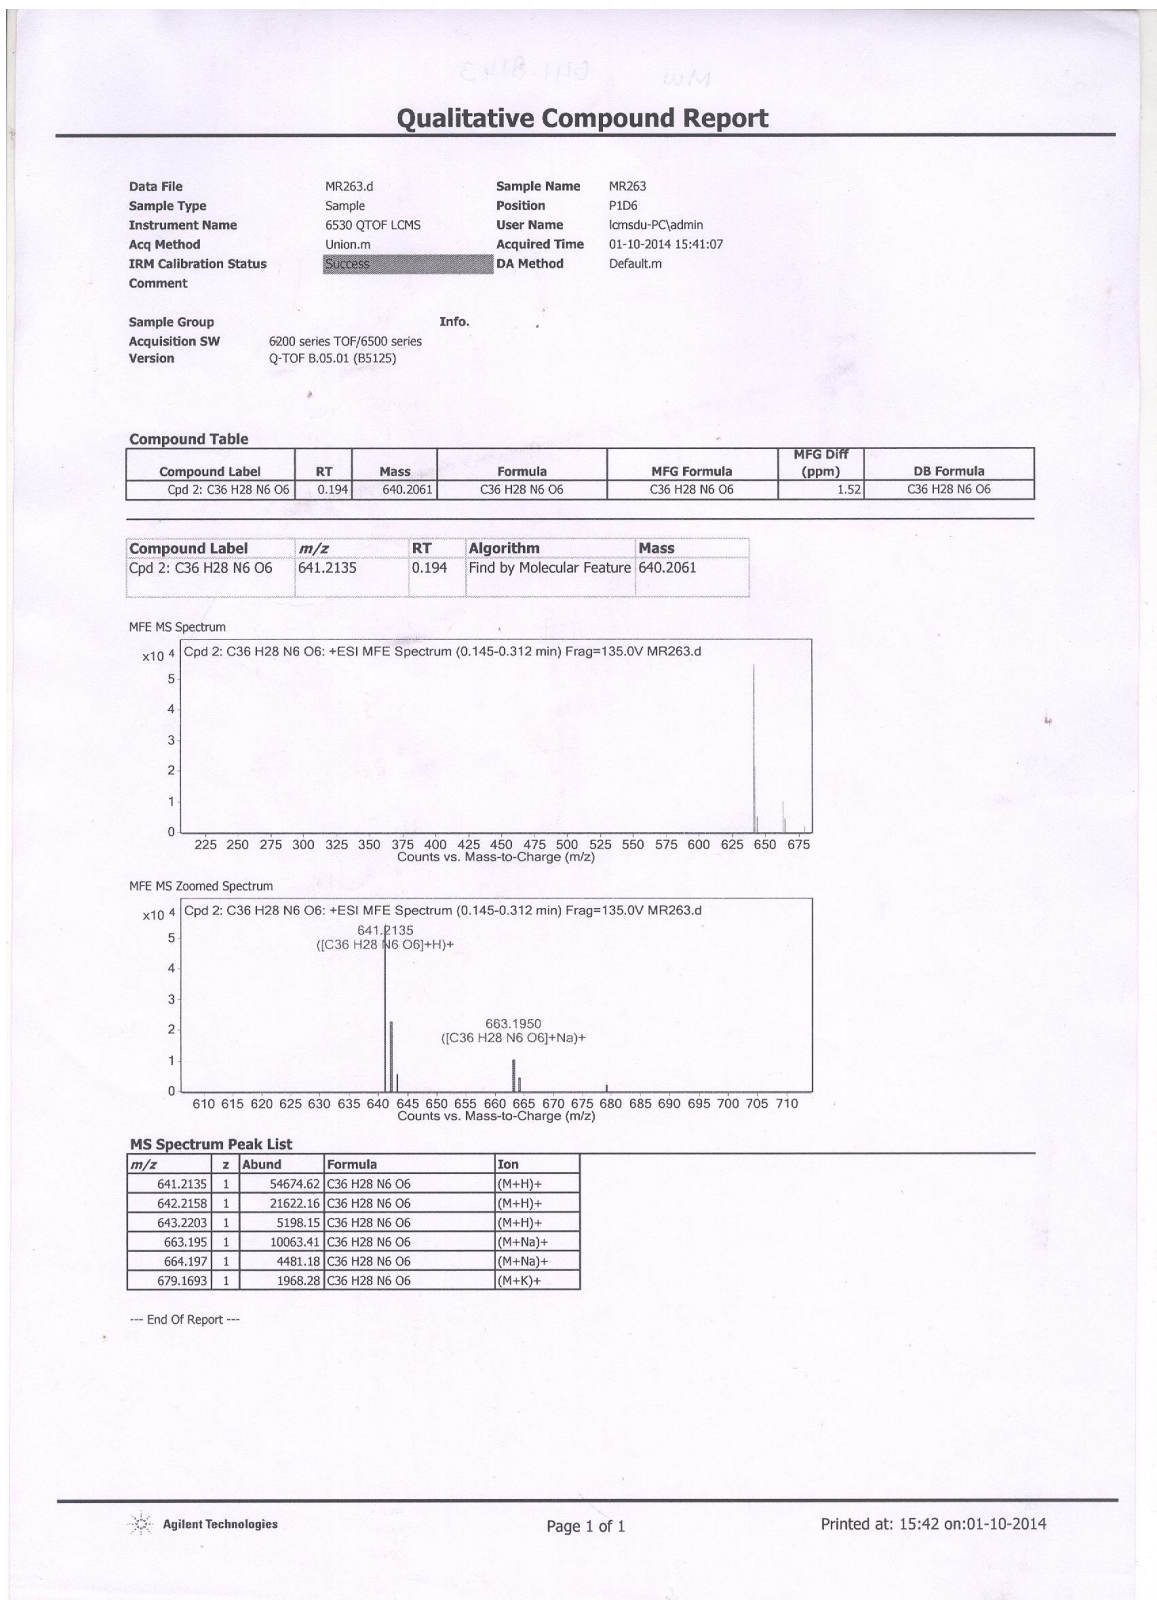

Figure 31.  $^1\text{H}$  NMR spectrum of compound **6k** (400 MHz,  $\text{CDCl}_3$ ).

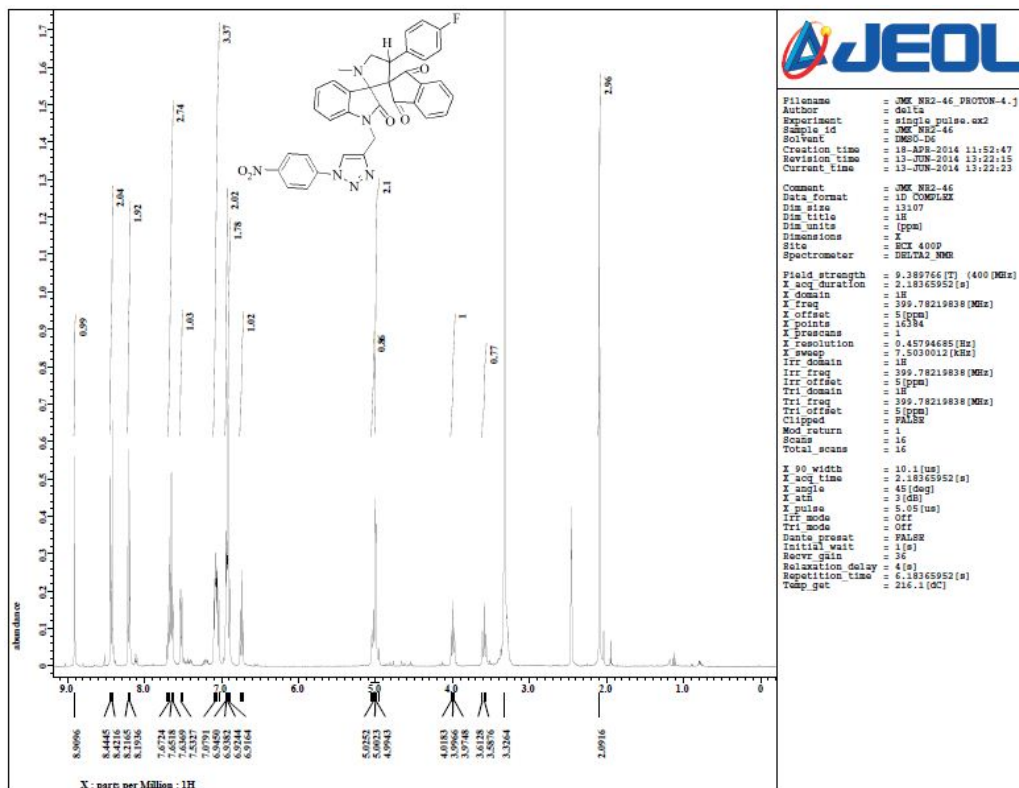

Figure 22.  $^{13}\text{C}$  NMR spectrum of compound **6k** (100 MHz,  $\text{CDCl}_3$ ).

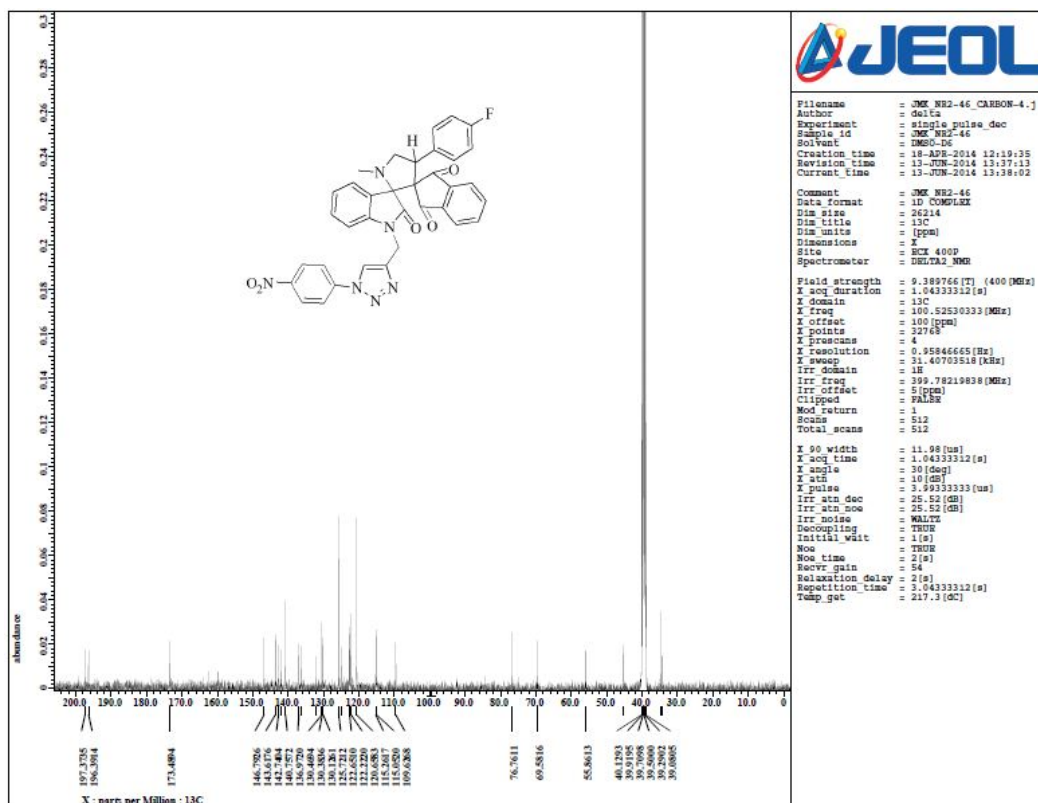



Figure 33. Mass spectrum of compound 6k.

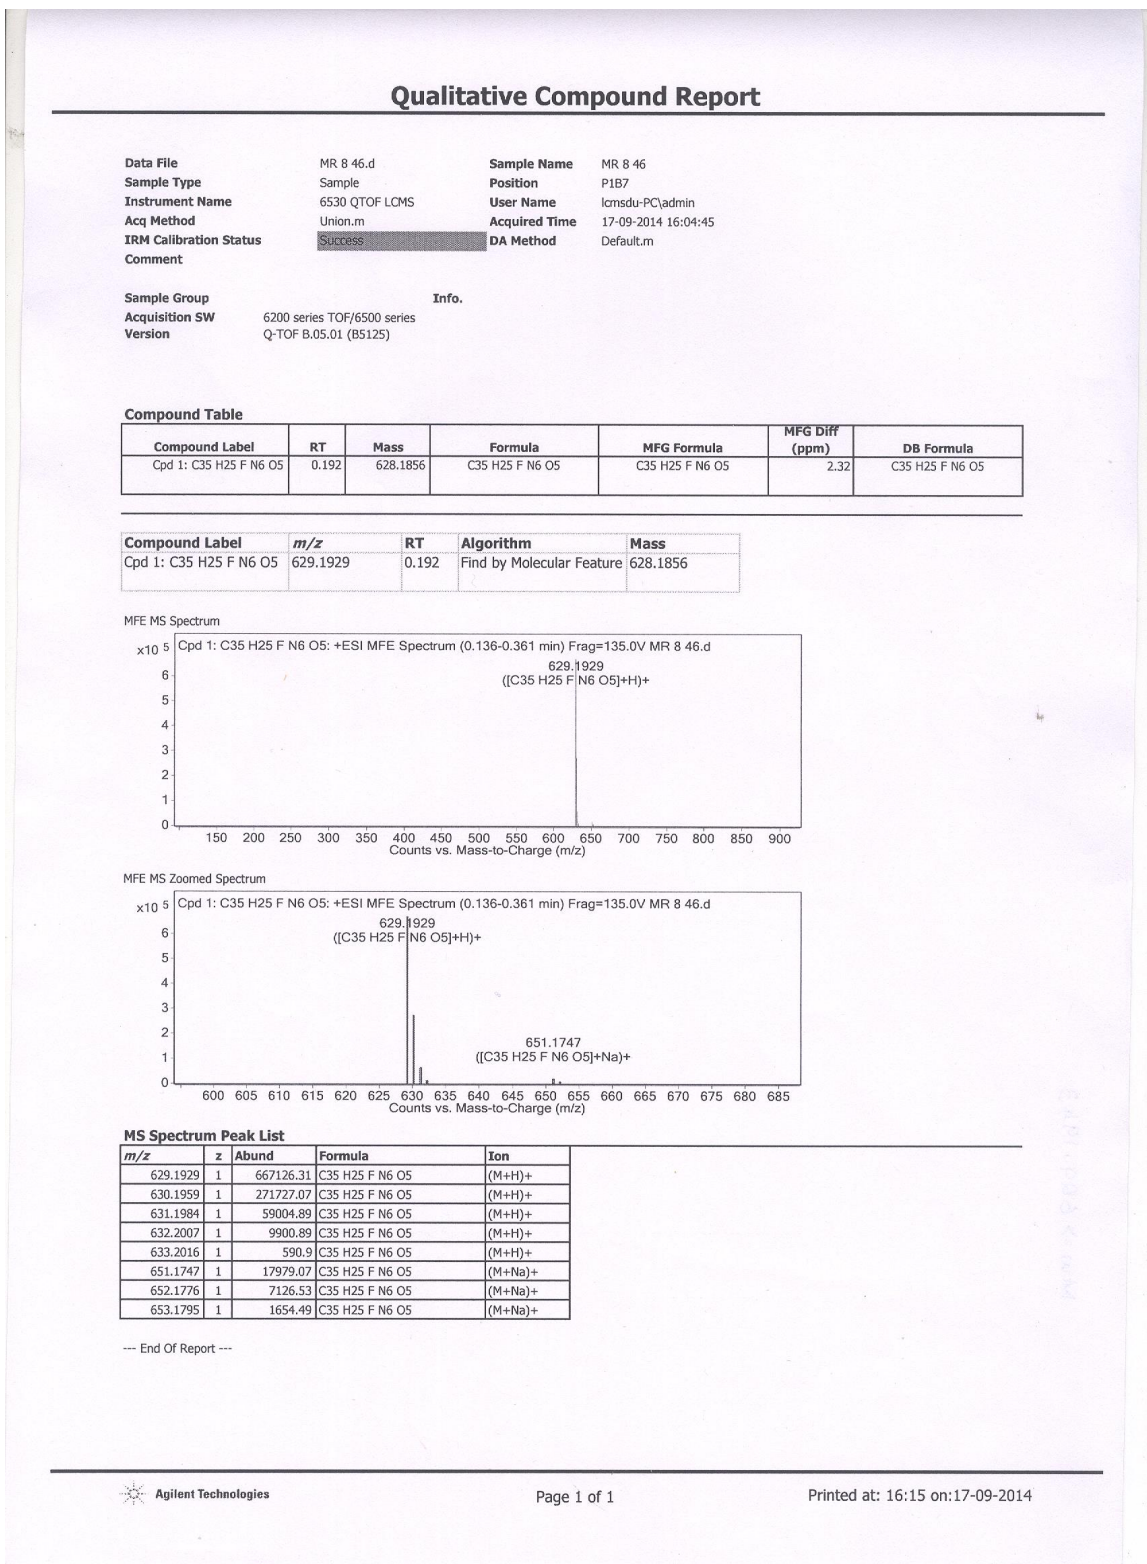

Figure 34.  $^1\text{H}$  NMR spectrum of compound **61** (400 MHz,  $\text{CDCl}_3$ ).

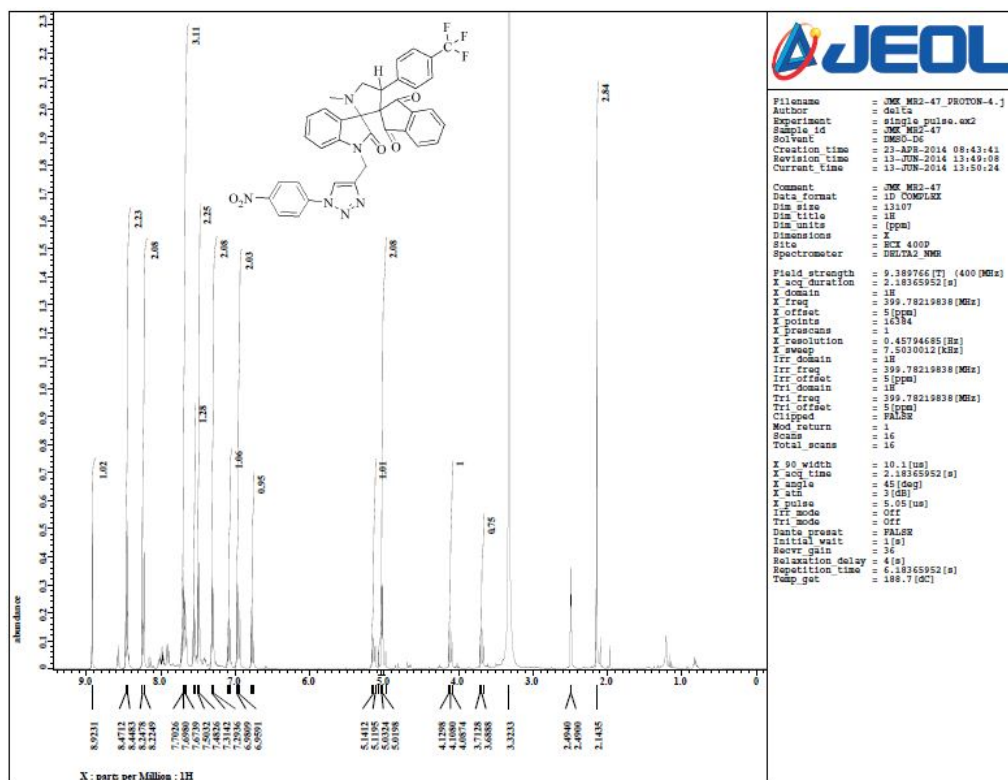

Figure 35.  $^{13}\text{C}$  NMR spectrum of compound **61** (100 MHz,  $\text{CDCl}_3$ ).

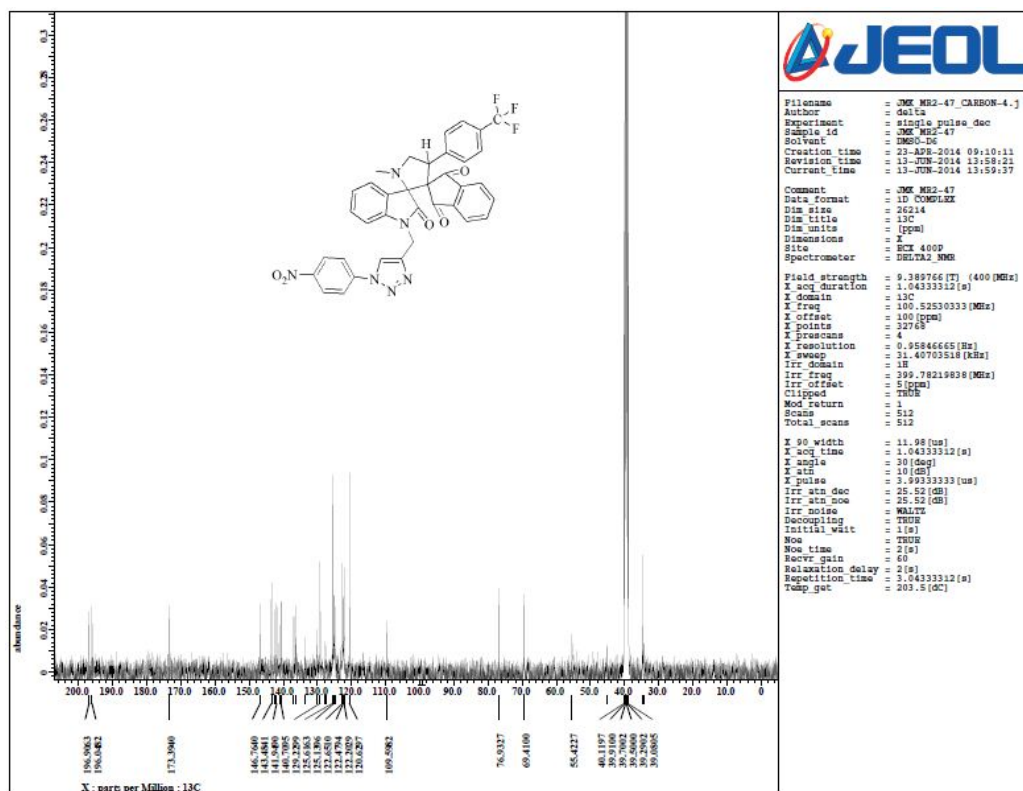



Figure 36. Mass spectrum of compound 6l.

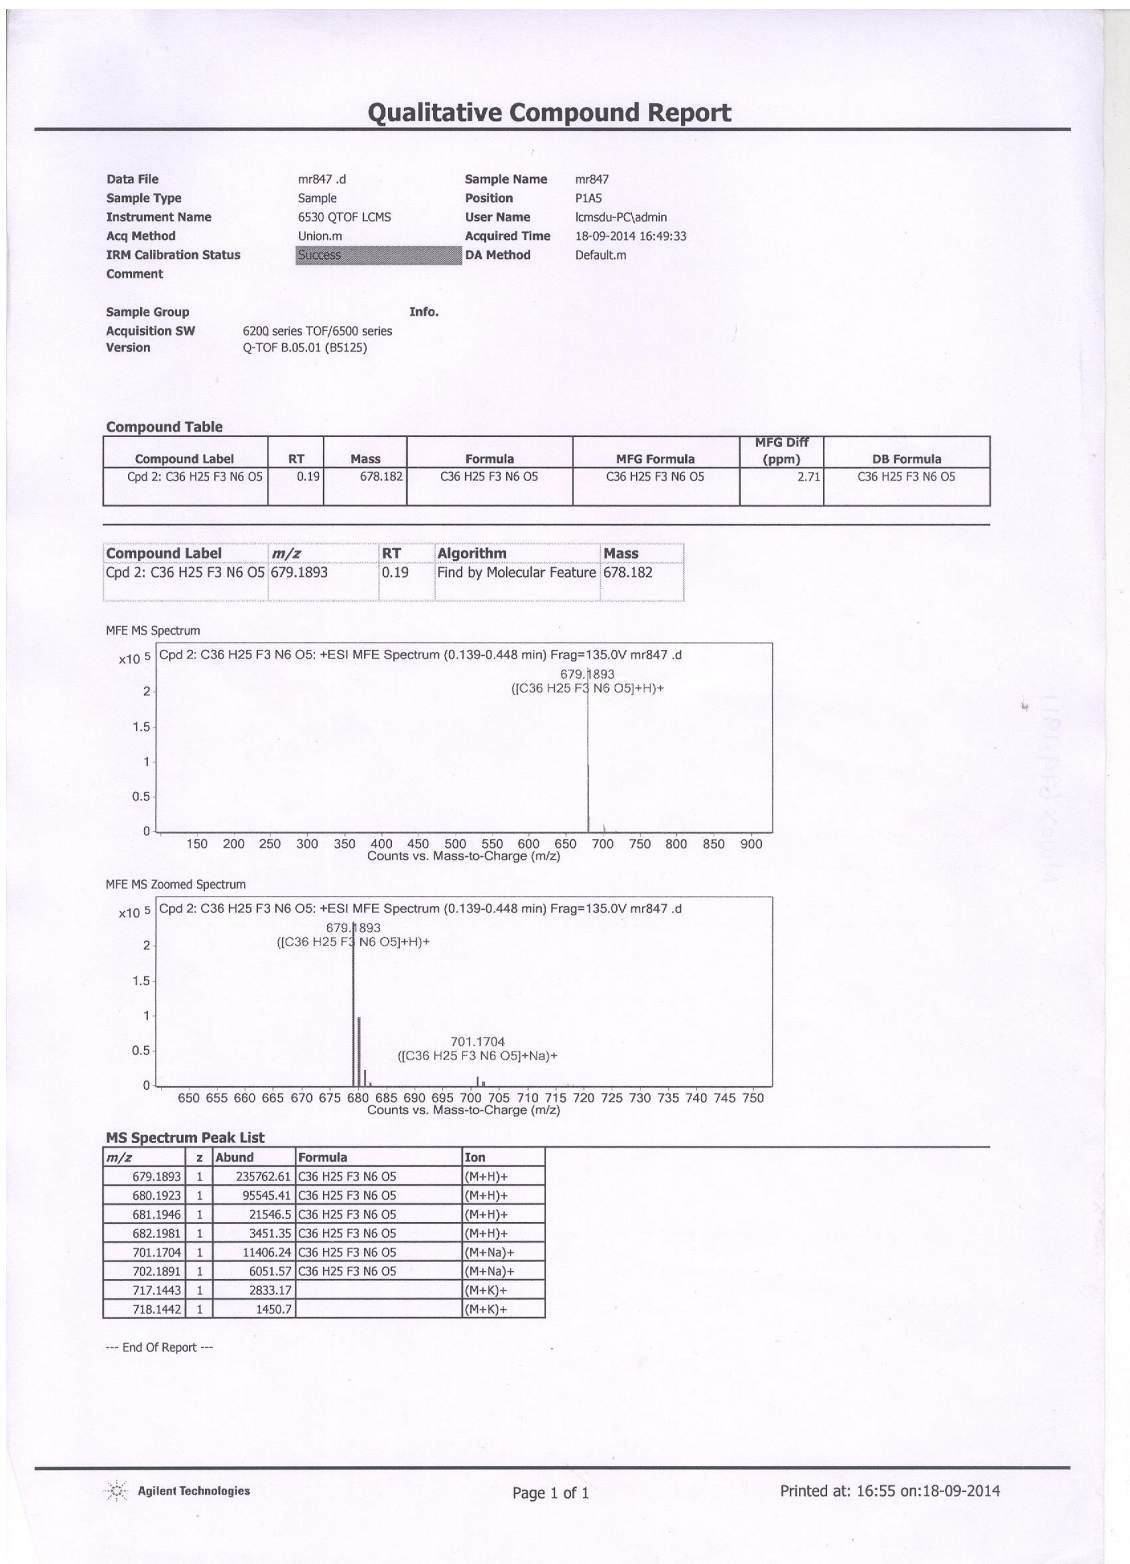

Figure 37.  $^1\text{H}$  NMR spectrum of compound **6m** (400 MHz,  $\text{CDCl}_3$ ).

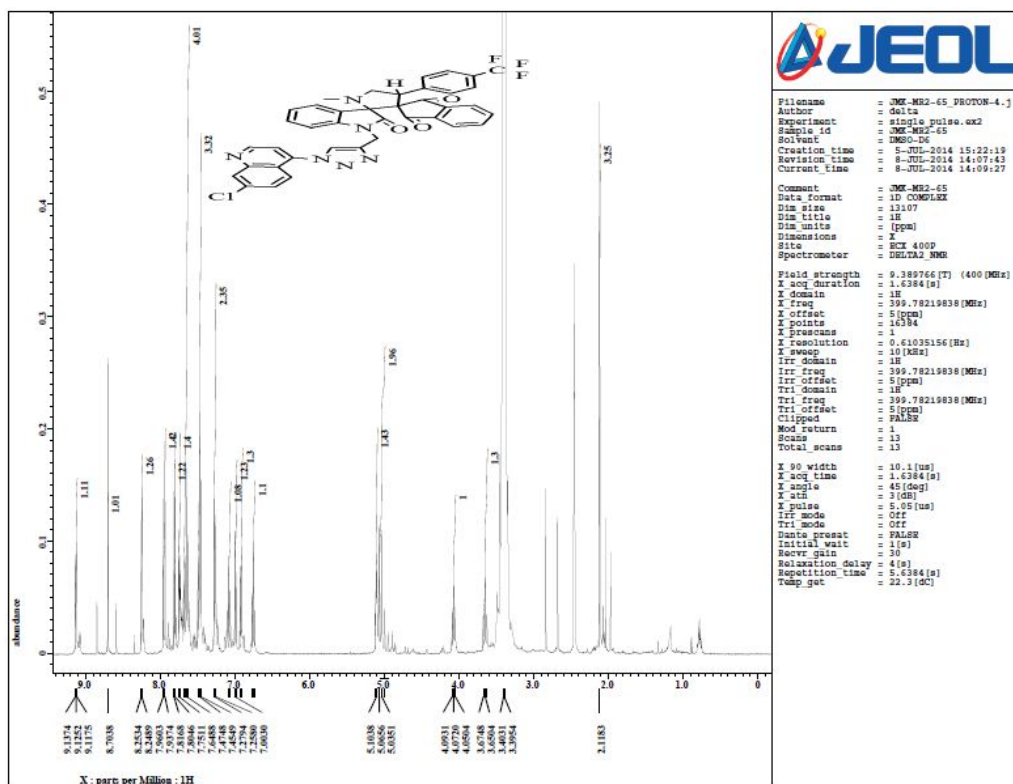

Figure 38.  $^{13}\text{C}$  NMR spectrum of compound **6m** (100 MHz,  $\text{CDCl}_3$ ).

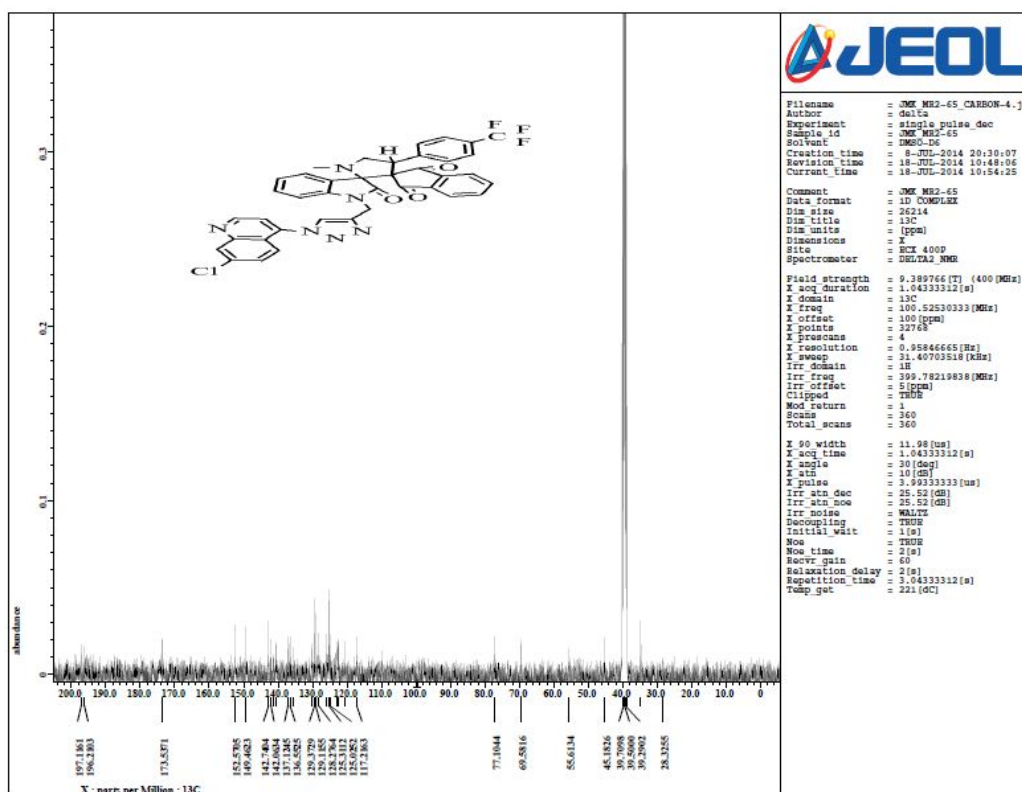



Figure 39. Mass spectrum of compound 6m.

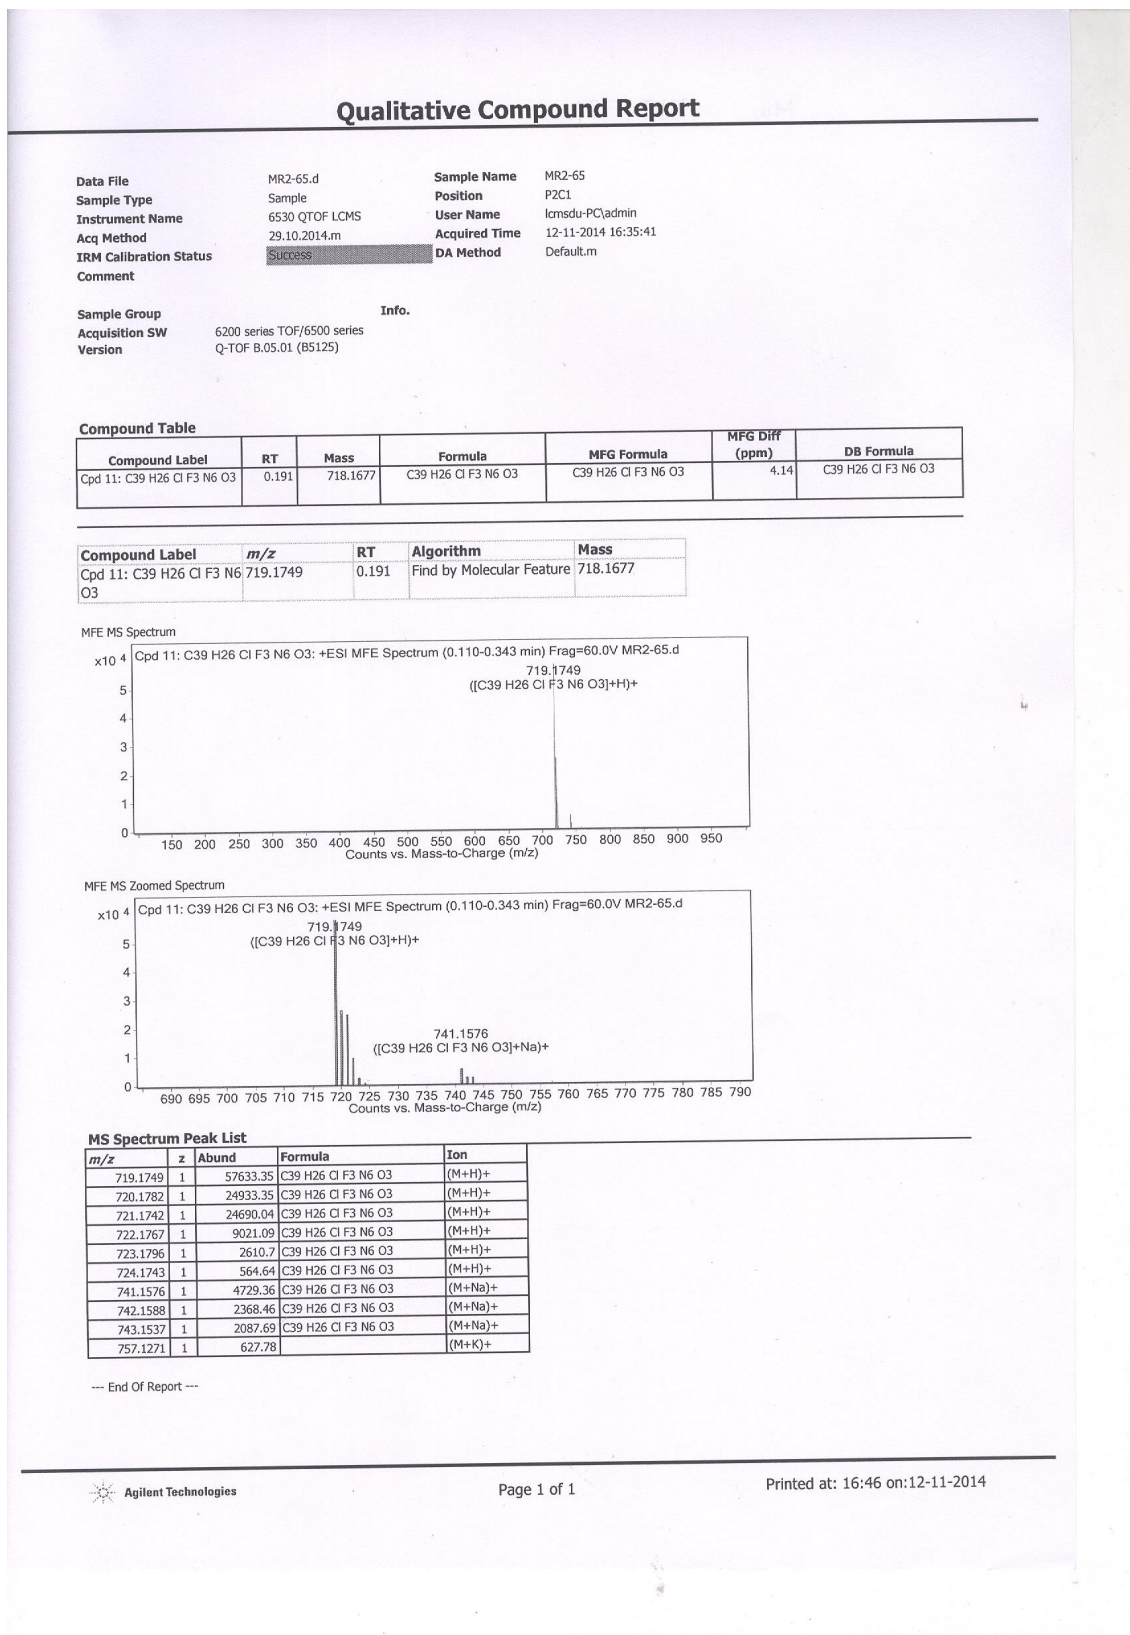

Figure 40.  $^1\text{H}$  NMR spectrum of compound **6n** (400 MHz,  $\text{CDCl}_3$ ).

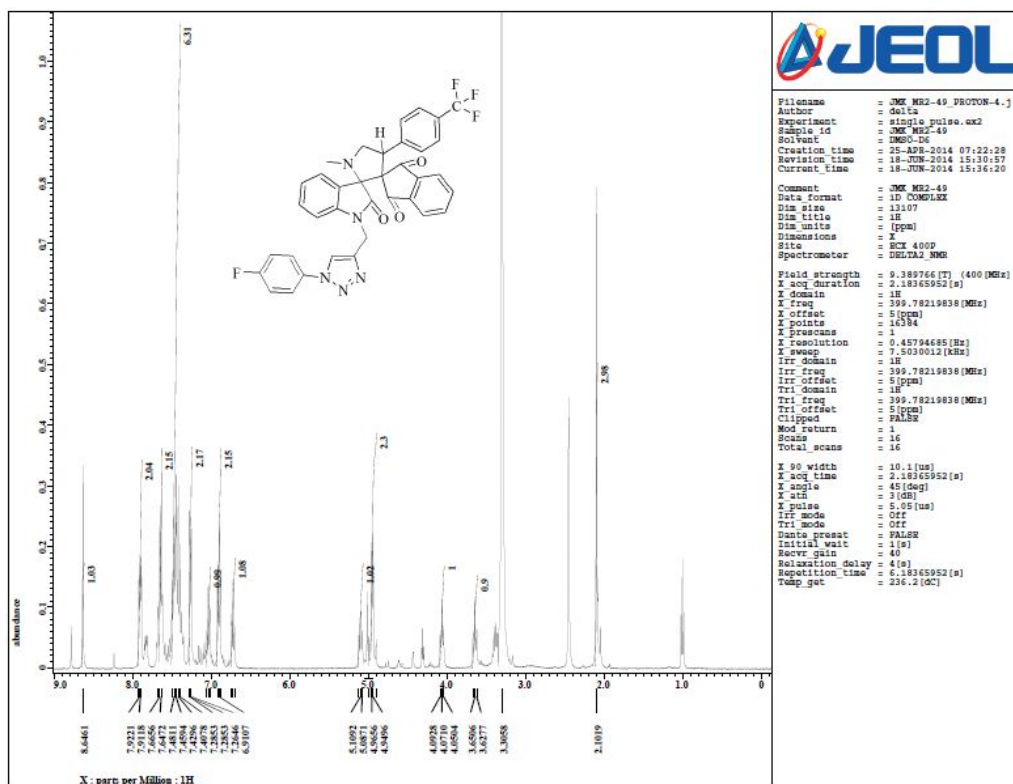

Figure 41.  $^{13}\text{C}$  NMR spectrum of compound **6n** (100 MHz,  $\text{CDCl}_3$ ).

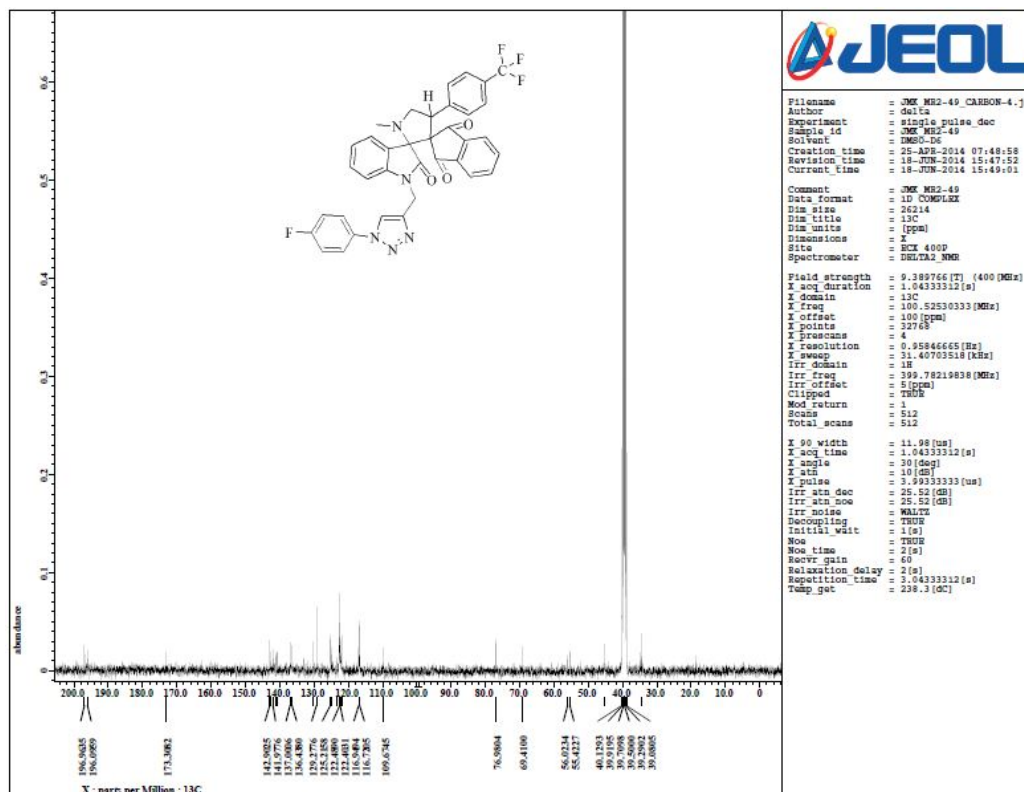



Figure 42. Mass spectrum of compound 6n.

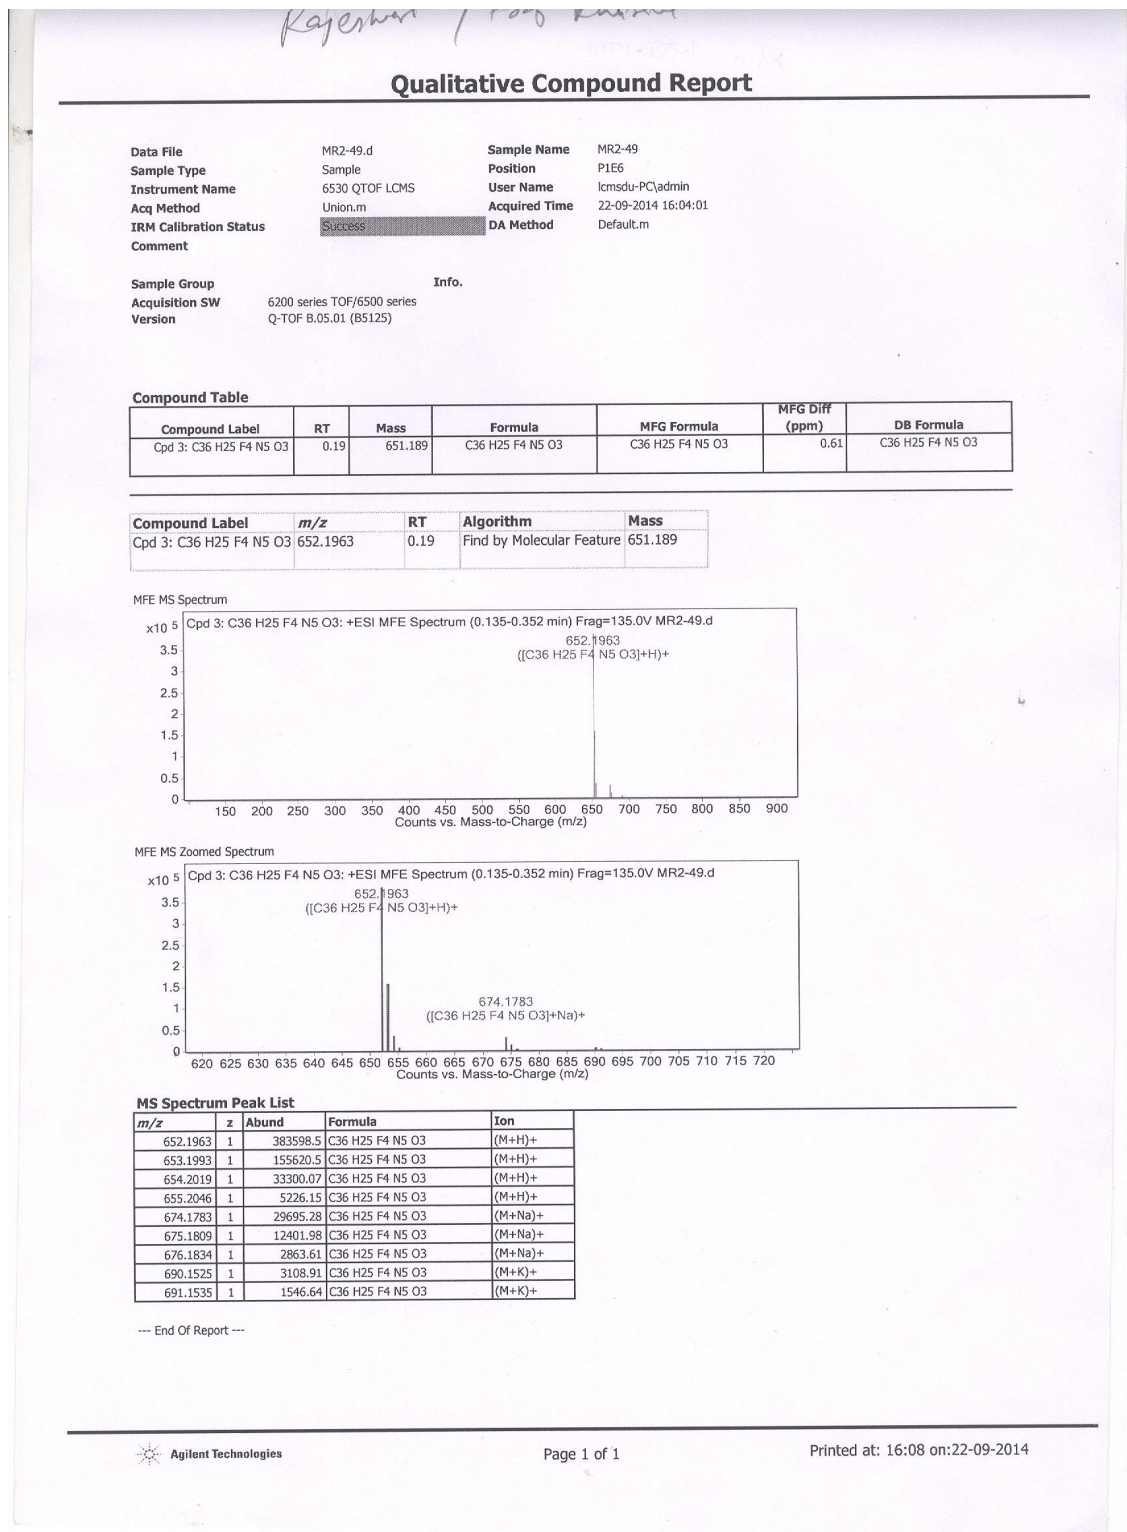

Figure 43. <sup>1</sup>H NMR spectrum of compound **60** (400 MHz, CDCl<sub>3</sub>).

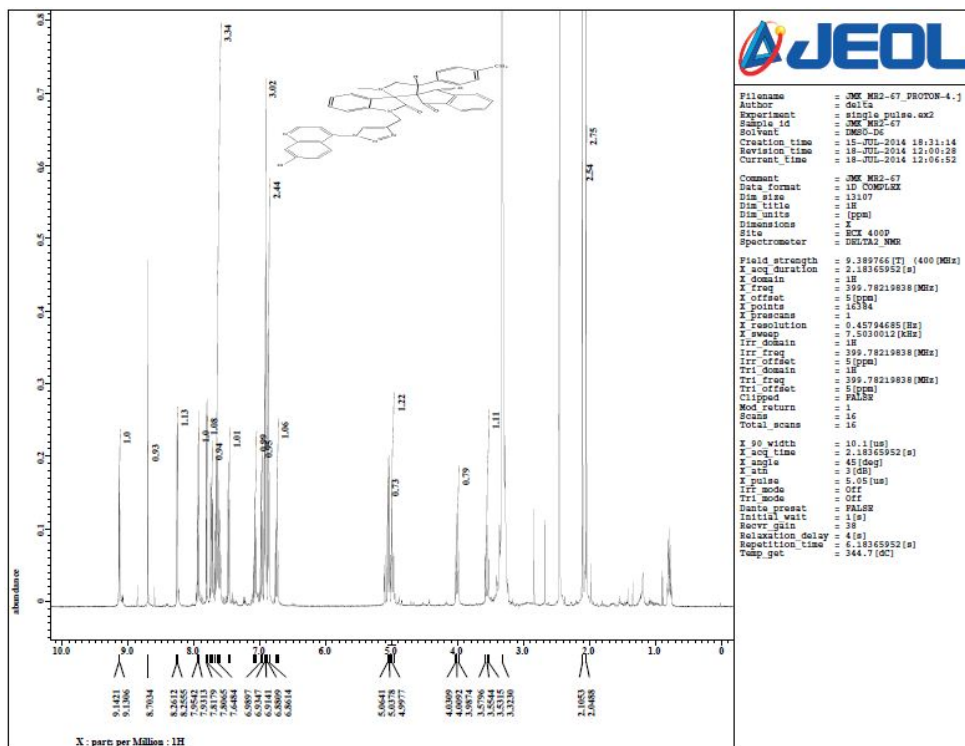

Figure 44. <sup>13</sup>C NMR spectrum of compound **60** (100 MHz, CDCl<sub>3</sub>).

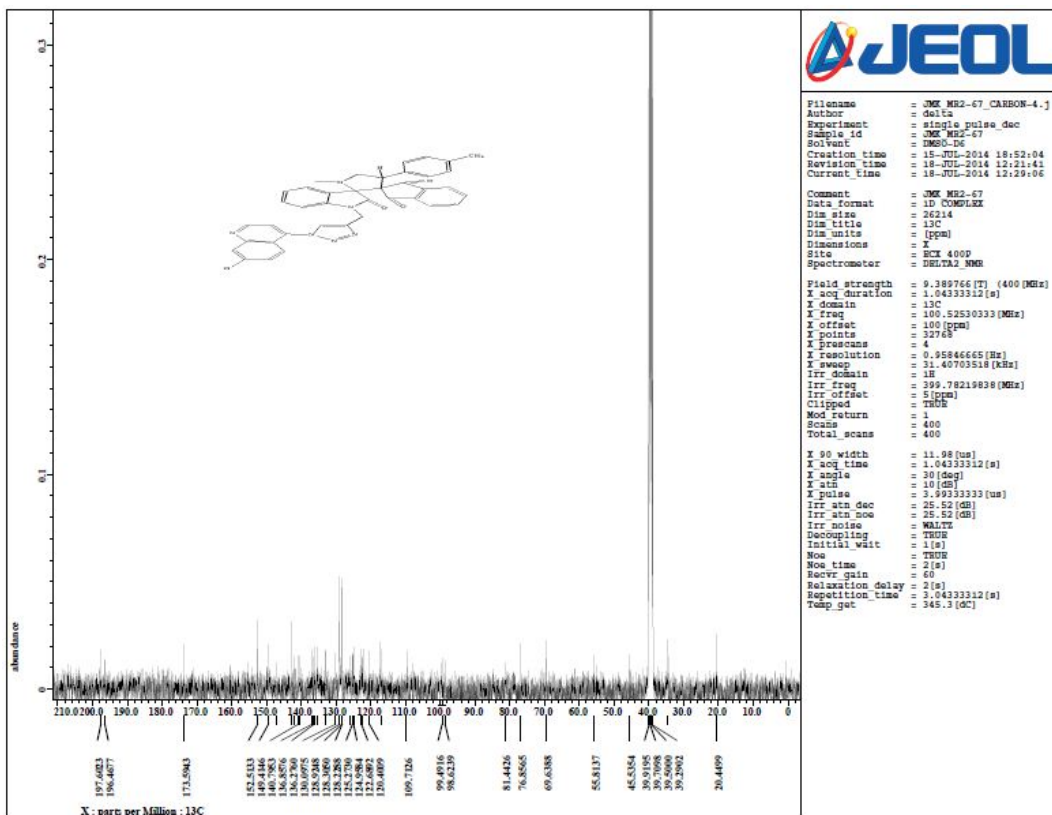



Figure 45. Mass spectrum of compound 60.

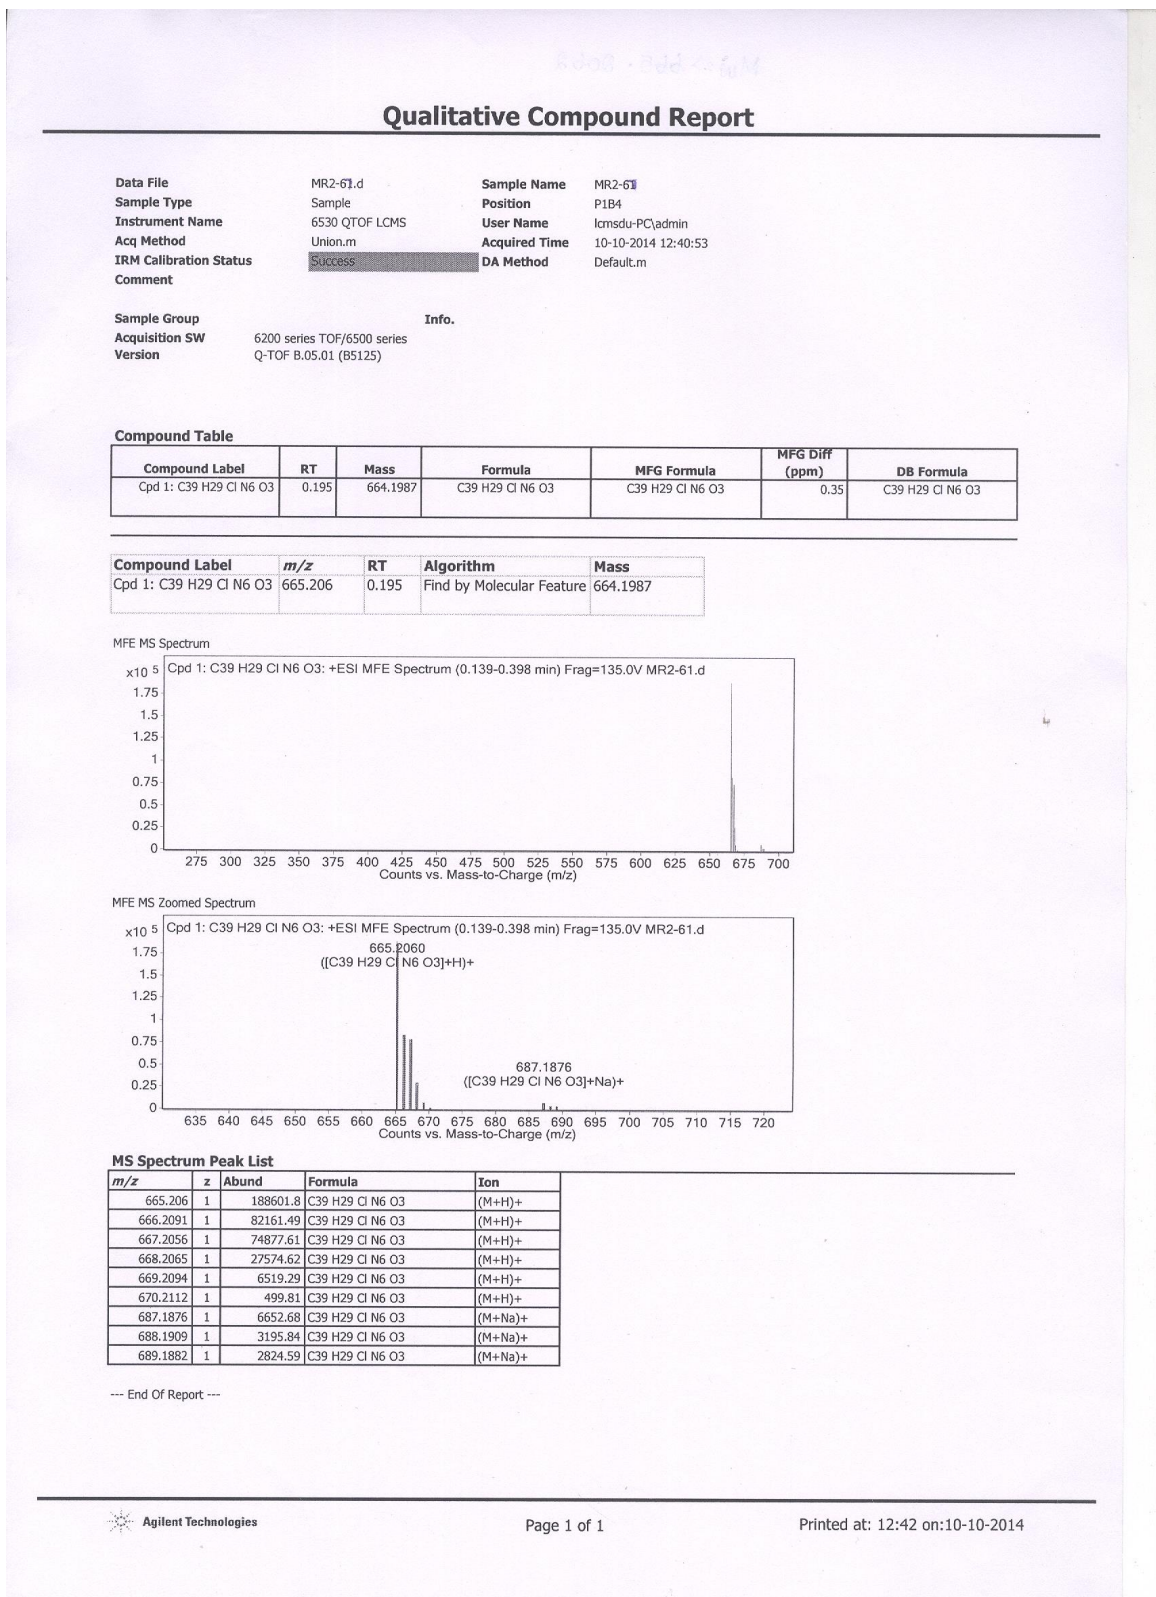

Figure 46.  $^1\text{H}$  NMR spectrum of compound **6p** (400 MHz,  $\text{CDCl}_3$ ).

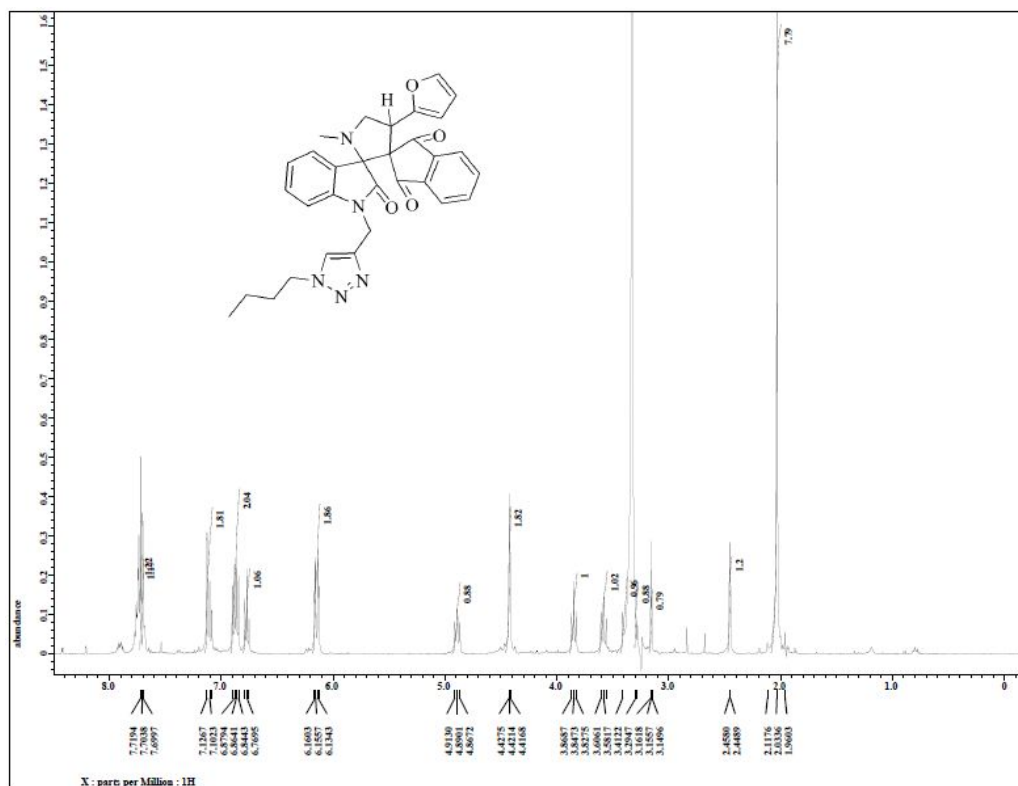

Figure 47.  $^{13}\text{C}$  NMR spectrum of compound **6p** (100 MHz,  $\text{CDCl}_3$ ).

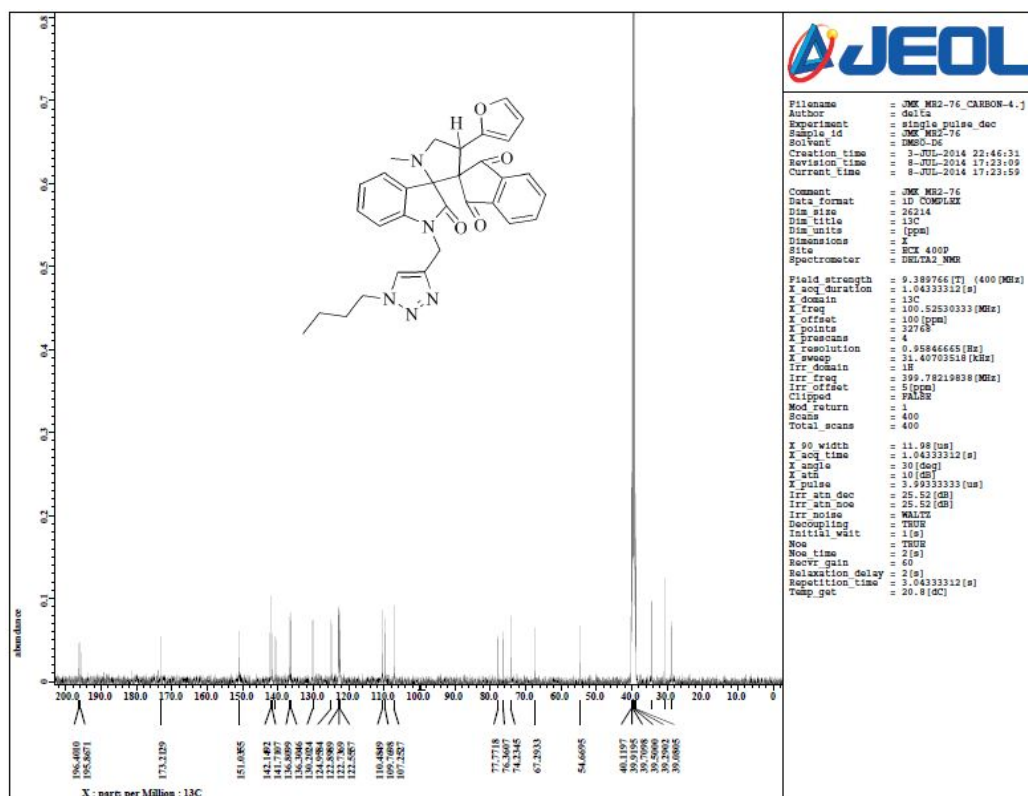



Figure 48. Mass spectrum of compound 6p.

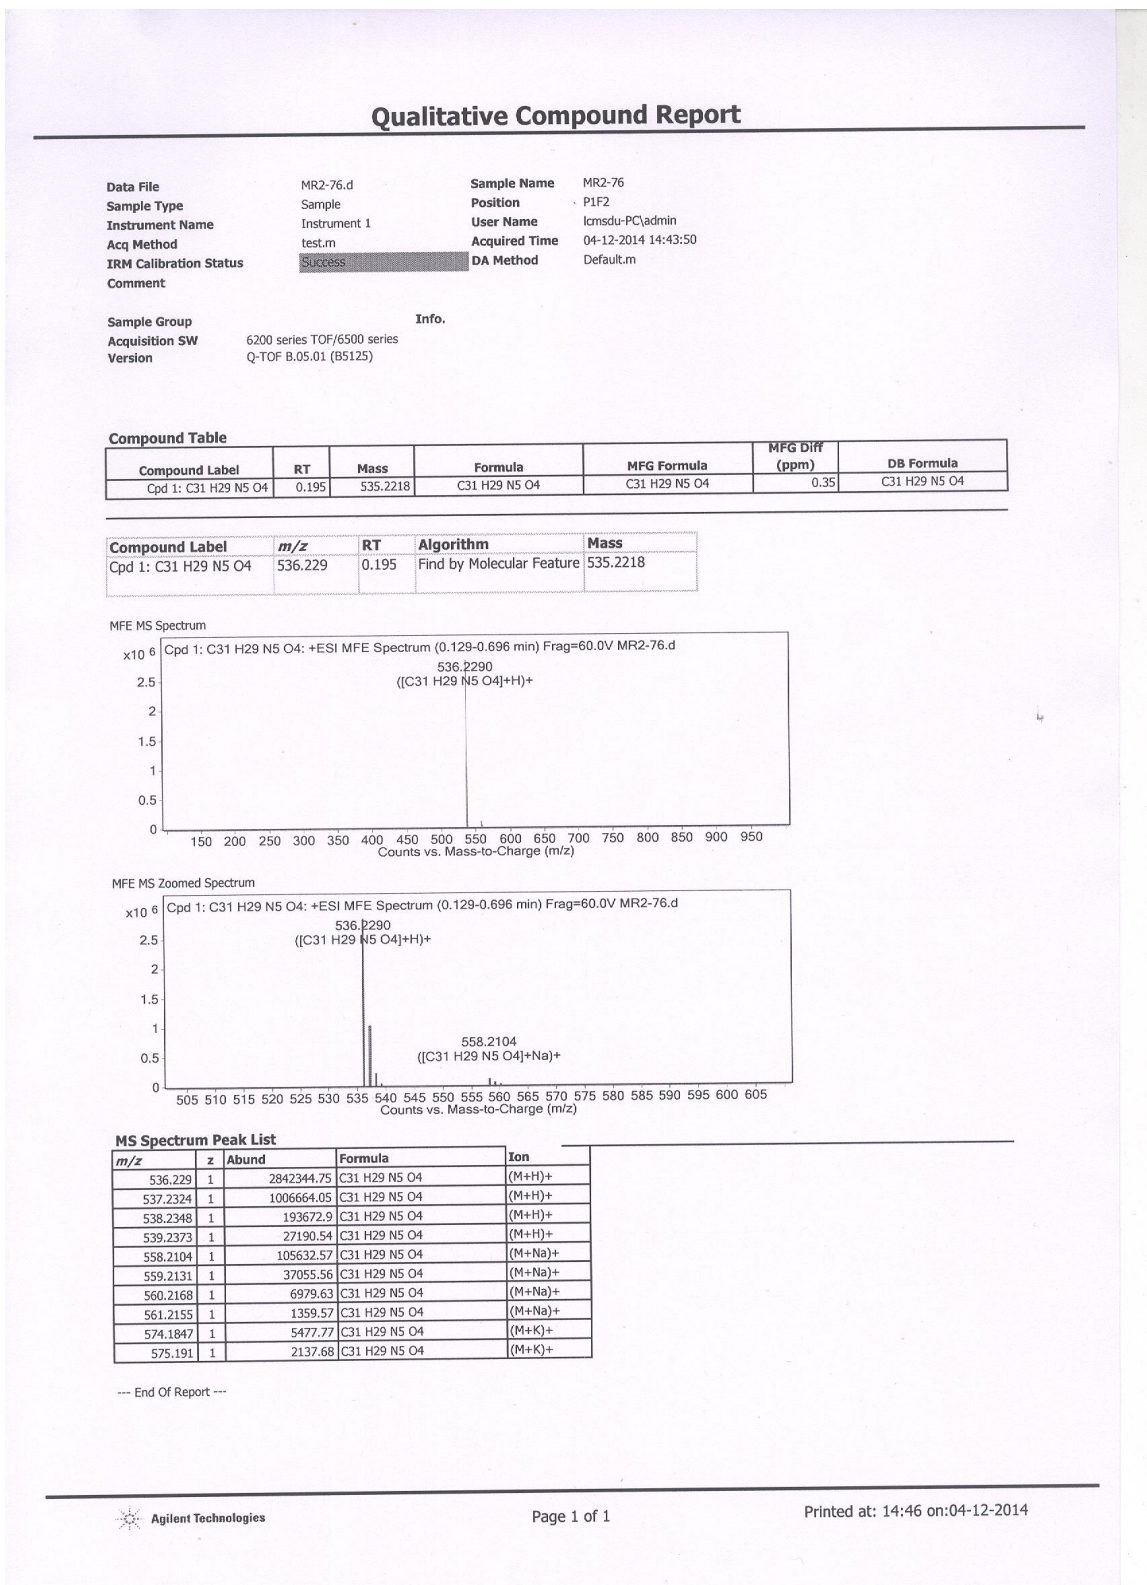

Figure 49. <sup>1</sup>H NMR spectrum of compound 6q (400 MHz, CDCl<sub>3</sub>).

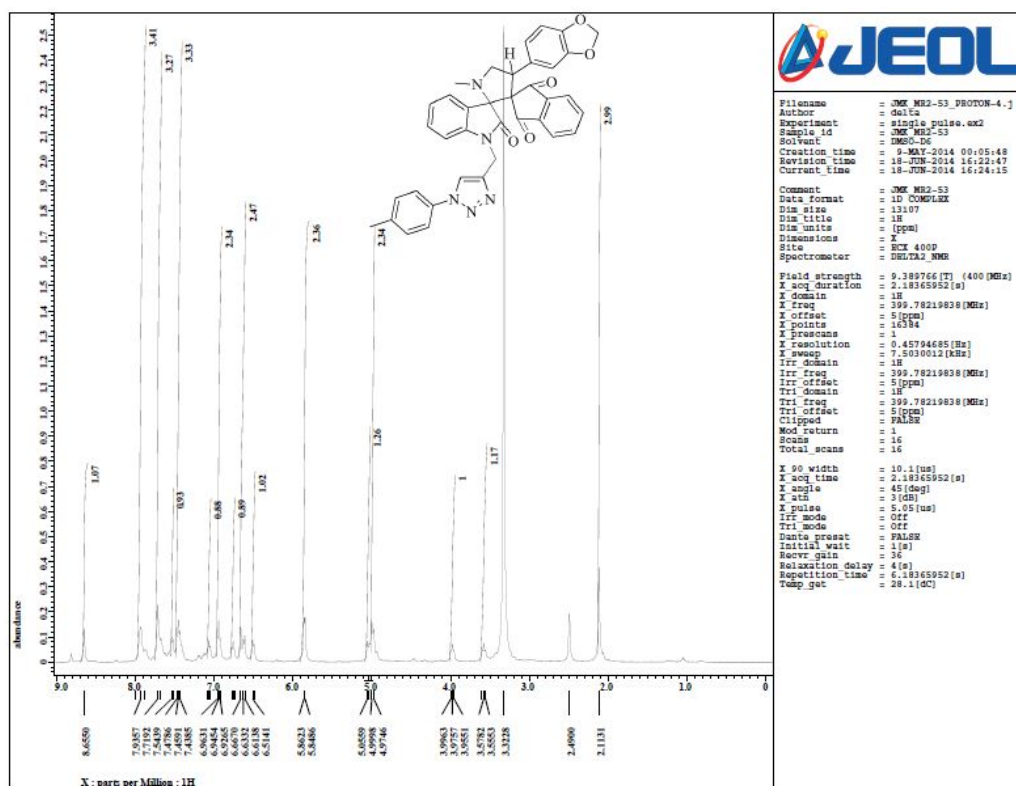

Figure 50. <sup>13</sup>C NMR spectrum of compound 6q (100 MHz, CDCl<sub>3</sub>).

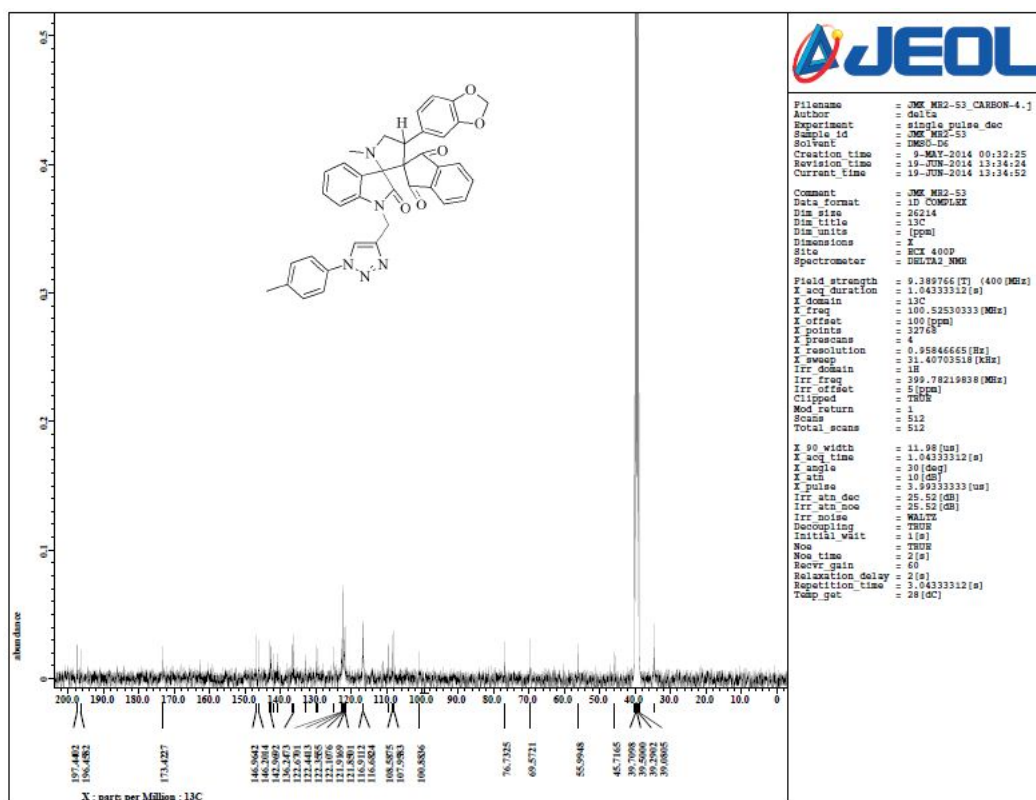



Figure 51. Mass spectrum of compound 6q.

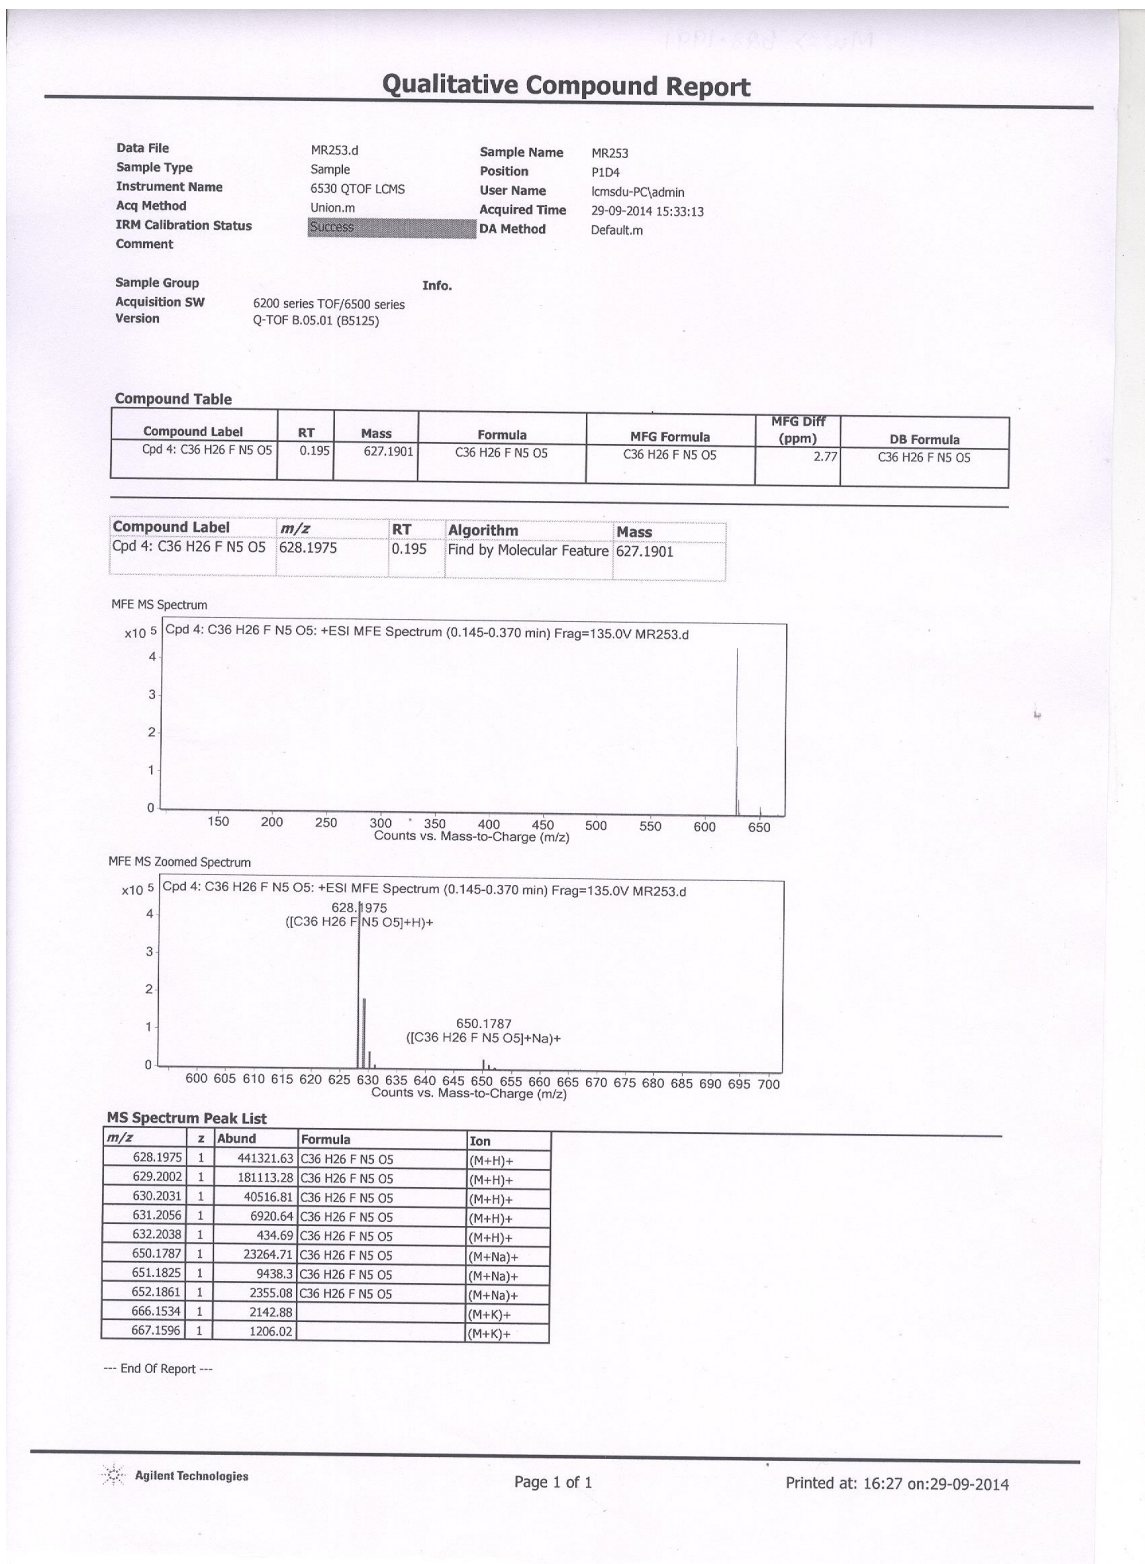

Figure 52. <sup>1</sup>H NMR spectrum of compound 6r (400 MHz, CDCl<sub>3</sub>).

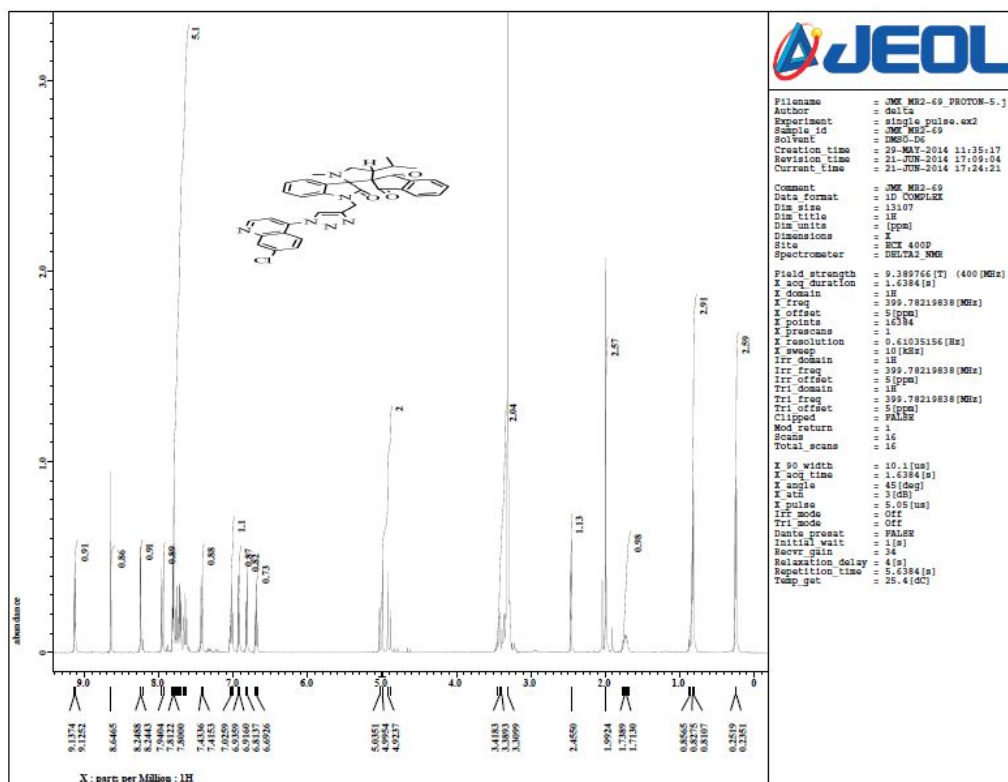

Figure 53. <sup>13</sup>C NMR spectrum of compound 6r (100 MHz, CDCl<sub>3</sub>).

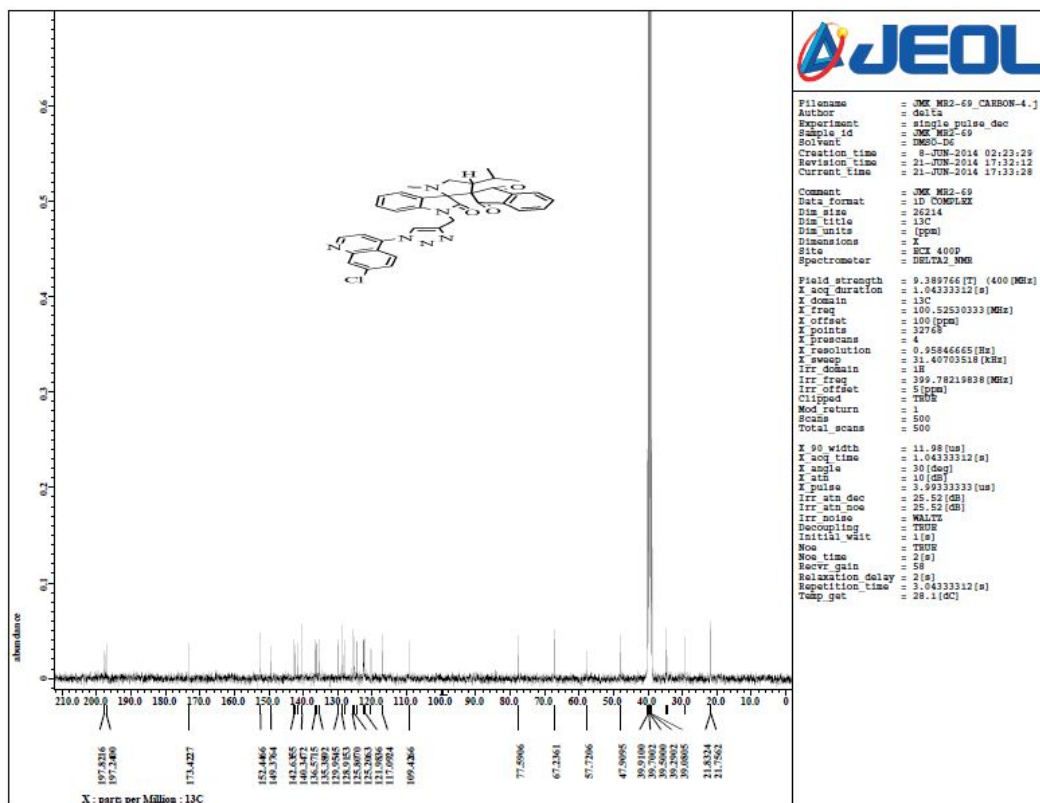

Figure 54. Mass spectrum of compound 6r.

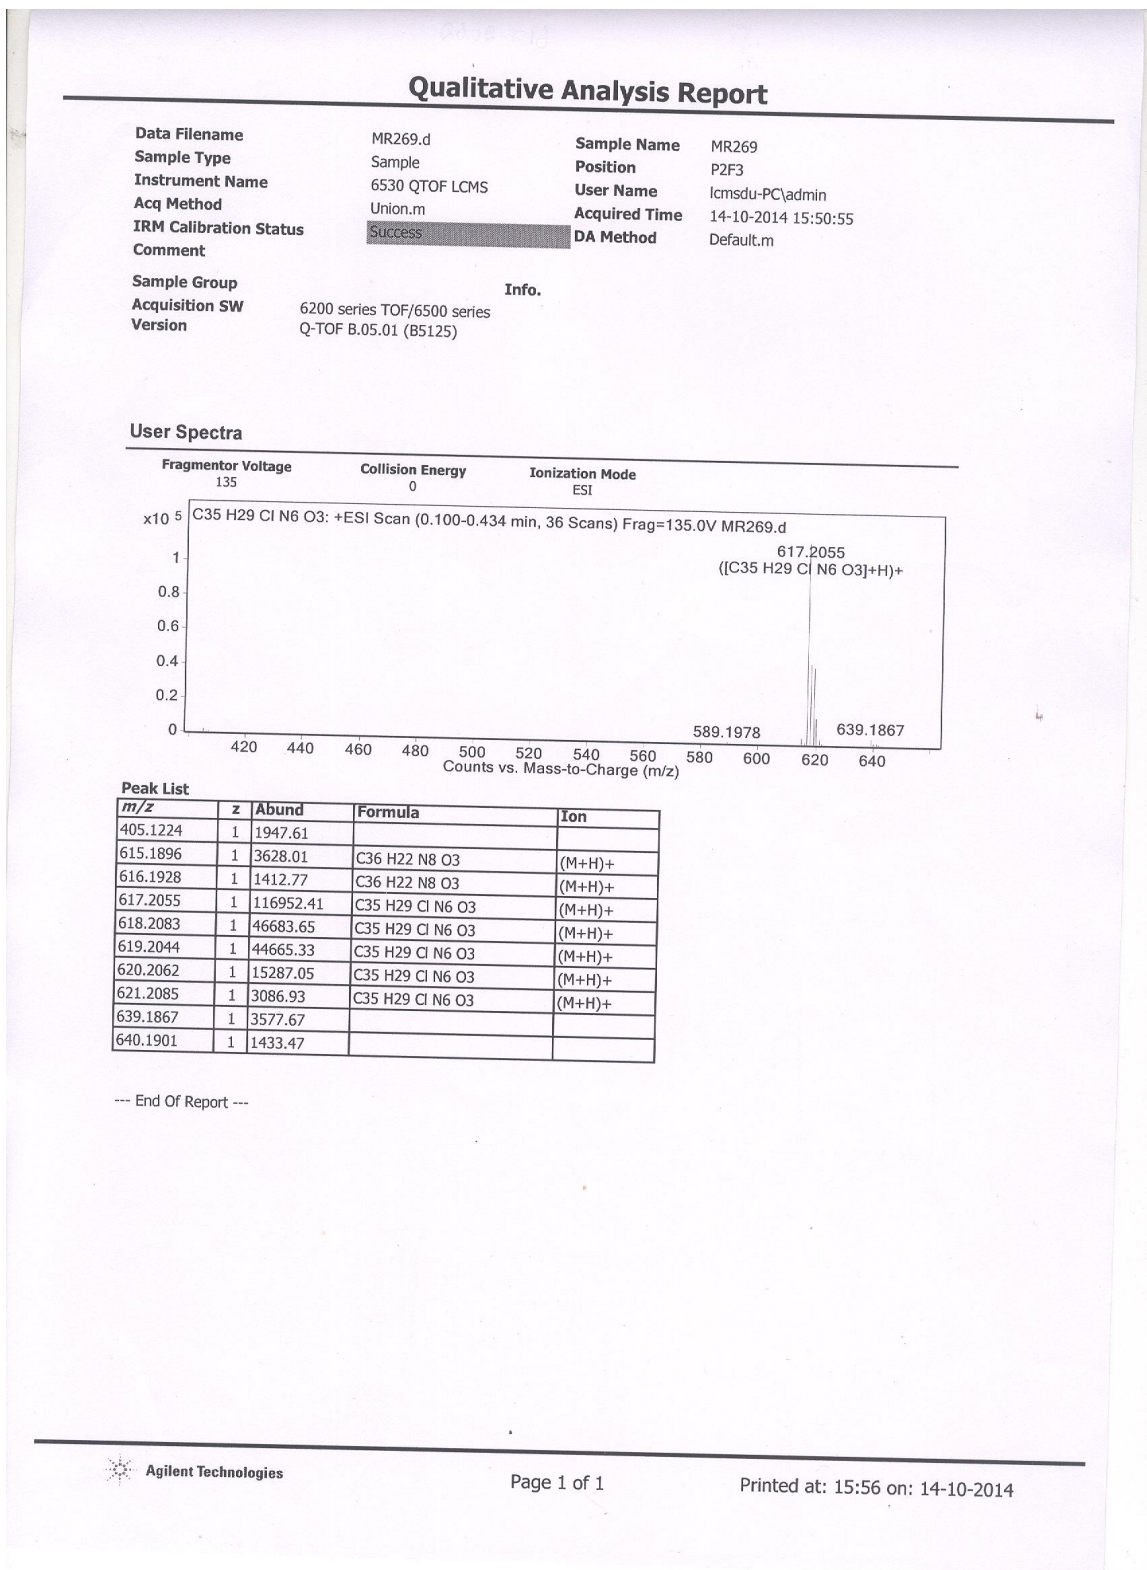



Figure 55. <sup>1</sup>H NMR spectrum of compound 6s (400 MHz, CDCl<sub>3</sub>).

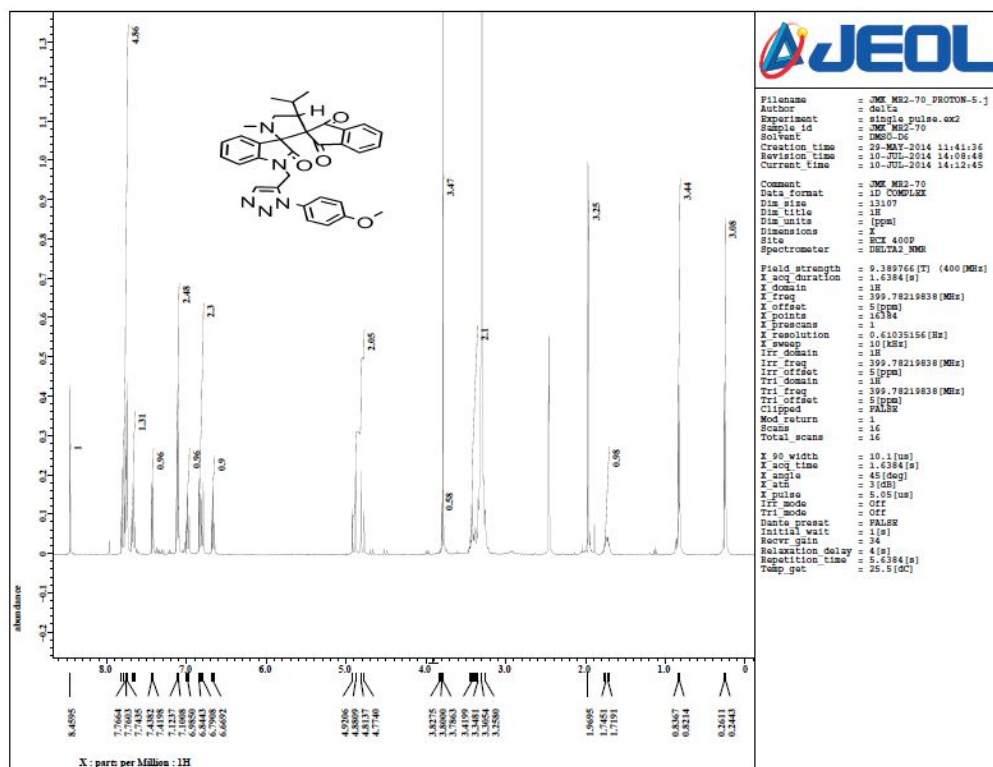

Figure 56. <sup>13</sup>C NMR spectrum of compound 6s (100 MHz, CDCl<sub>3</sub>).

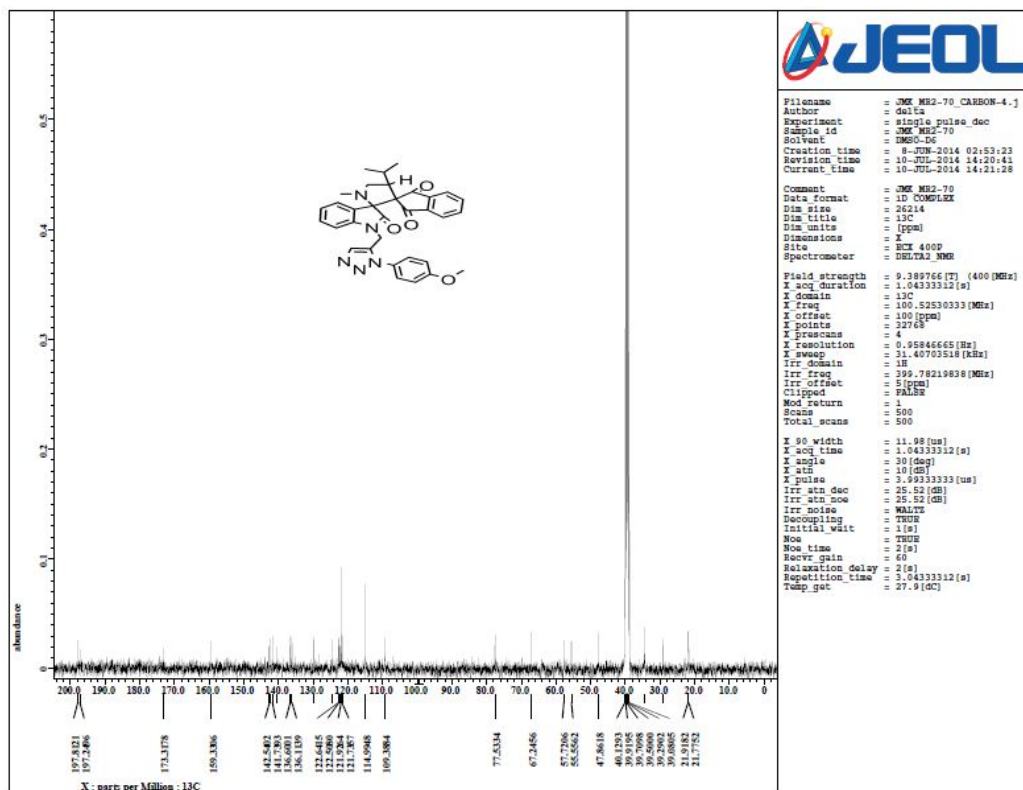



Figure 57. Mass spectrum of compound 6s.

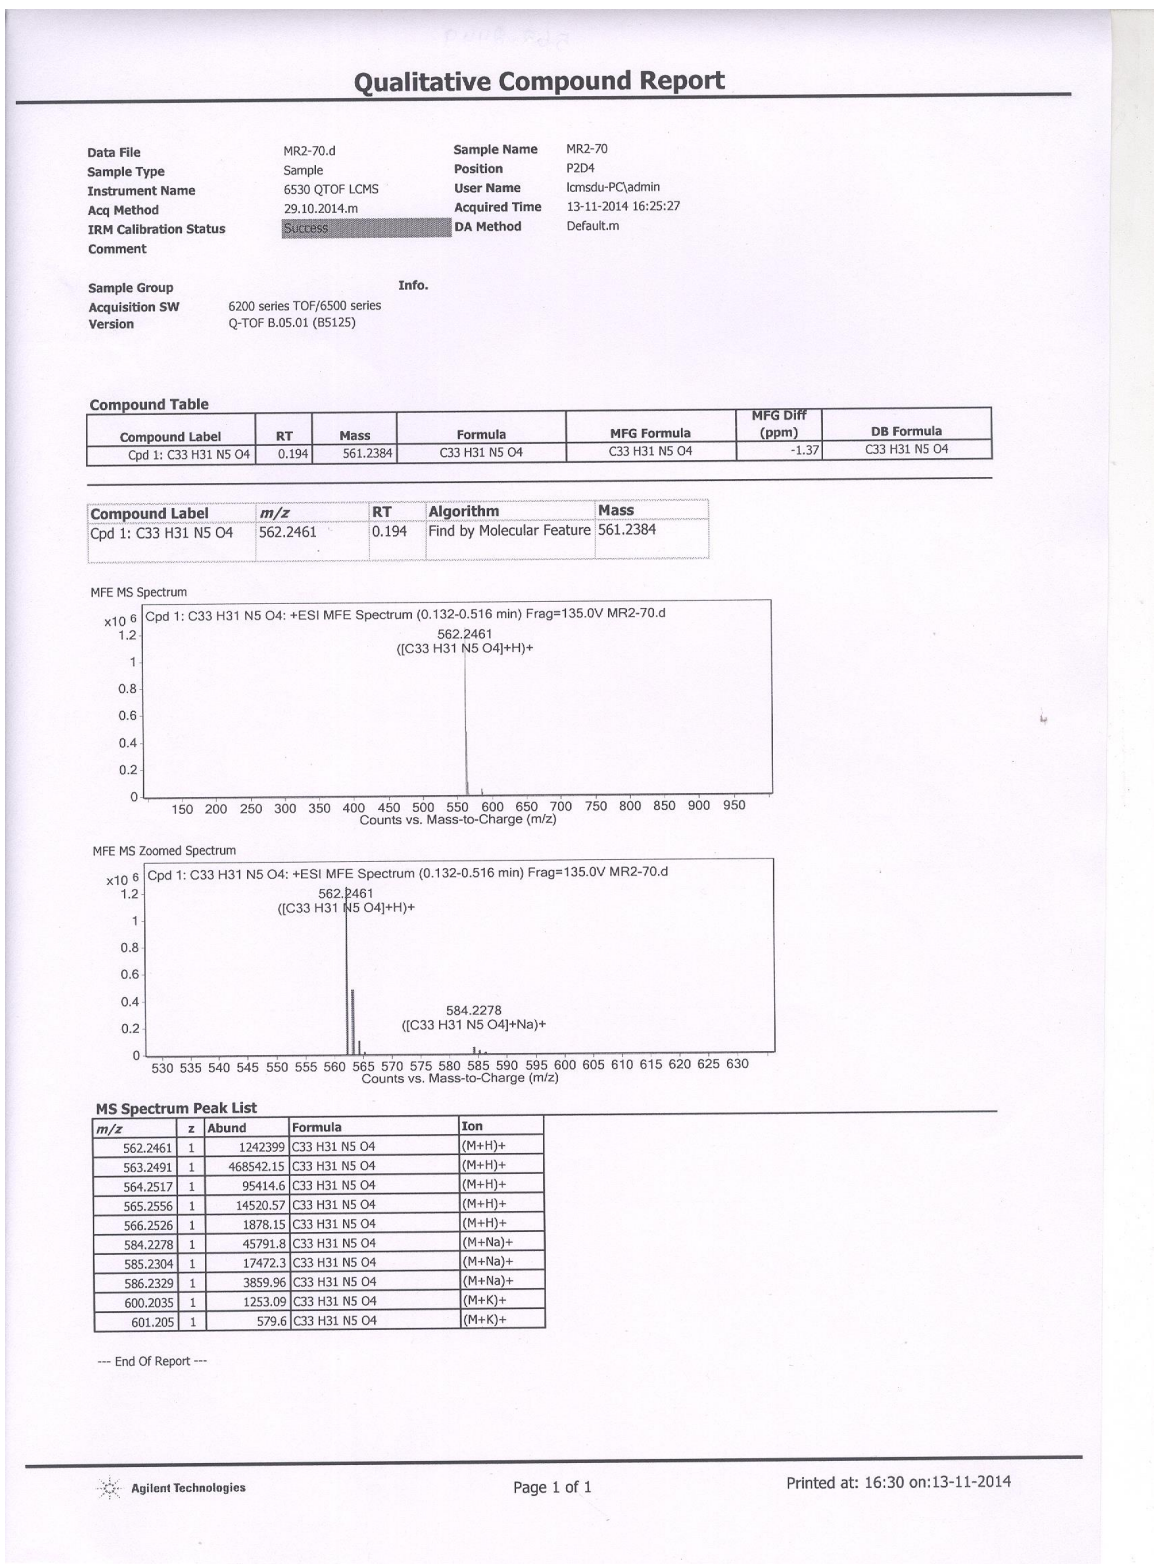

Supplement: c5ra03505h1.pdf [file c5ra03505h1.pdf]
